# Supplementary material
Source: publisher figshare collection journal article supplement (https://wiley.figshare.com/articles/dataset/_/3521588)
Supplement: Supplementary file 1 [file 1]

Table 5. pH and alkalinity of Adirondack study lakes.

| Lake         | Date lake sampled | Depth of integ. sample m | pH          |            |             |            |             |            | Alkalinity/Acidity   |           |        |
|--------------|-------------------|--------------------------|-------------|------------|-------------|------------|-------------|------------|----------------------|-----------|--------|
|              |                   |                          | Surface     |            | Lake ave.   |            | Integ.      |            | Surface              | Lake ave. | Integ. |
|              |                   |                          | before aer. | after aer. | before aer. | after aer. | before aer. | after aer. | — $\mu\text{eq/L}$ — |           |        |
| Arbutus L.   | 5/30/78           | 7.0                      | 6.54        | 6.72       | ND          | ND         | 6.29        | 6.70       | 50.0                 | ND        | 52.0   |
|              | 6/29/78           | 6.5                      | 6.79        | 7.00       | ND          | ND         | 6.45        | 7.02       | 70.0                 | ND        | 90.0   |
|              | 7/24/78           | 7.2                      | 6.67        | 6.86       | ND          | ND         | 6.30        | 7.06       | 59.1                 | ND        | 76.1   |
|              | 8/13/78           | 7.0                      | 6.67        | 6.98       | ND          | ND         | 6.24        | 7.09       | 75.5                 | ND        | 90.8   |
|              | 5/28/79           | 7.6                      | 6.43        | 6.71       | 6.43        | 6.74       | 6.23        | 6.74       | 52.5                 | 109.1     | 74.9   |
|              | 6/20/79           | 7.0                      | 6.67        | 6.81       | 6.38        | 6.83       | 6.28        | 6.84       | 54.6                 | 57.2      | 56.0   |
|              | 8/25/79           | 7.0                      | 6.85        | 6.98       | 6.70        | 7.01       | 6.43        | 7.05       | 73.5                 | 78.8      | 98.7   |
| Avalanche L. | 6/23/78           | 6.5                      | 4.93        | 4.89       | ND          | ND         | 4.95        | 4.93       | -6.0                 | ND        | -6.0   |
|              | 7/20/78           | 6.0                      | 4.91        | 4.88       | ND          | ND         | 4.94        | 4.95       | -6.2                 | ND        | -6.9   |
|              | 8/17/78           | 7.0                      | 4.94        | 4.89       | ND          | ND         | 5.17        | 4.95       | -6.1                 | ND        | -1.8   |
|              | 5/18/79           | 6.0                      | 4.79        | 4.79       | 4.80        | 4.77       | 4.79        | 4.78       | -11.4                | -8.2      | -11.2  |
|              | 6/19/79           | 7.0                      | 4.86        | 4.84       | 4.87        | 4.83       | 4.85        | 4.83       | 7.8                  | -4.1      | -10.3  |
|              | 8/9/79            | 7.0                      | 4.85        | 4.89       | 4.82        | 4.82       | 4.89        | 4.89       | -8.2                 | -7.9      | -5.5   |
| Bear P.      | 5/23/78           | 18.0                     | 4.92        | 5.02       | ND          | ND         | 4.97        | 5.07       | -4.0                 | ND        | -12.0  |
|              | 7/12/78           | 16.0                     | 5.07        | 5.08       | ND          | ND         | 5.07        | 4.98       | -12.6                | ND        | -10.1  |
|              | 8/10/78           | 16.0                     | 4.97        | 5.03       | ND          | ND         | 5.02        | 5.09       | 9.5                  | ND        | -8.6   |
|              | 5/25/79           | 16.0                     | 4.95        | 4.95       | 4.95        | 4.98       | 4.93        | 4.98       | -8.3                 | -11.2     | -10.5  |
|              | 6/26/79           | 16.0                     | 4.84        | 4.81       | 4.79        | 4.78       | 4.79        | 4.84       | -4.7                 | -17.5     | -3.3   |
|              | 8/23/79           | 16.0                     | 4.90        | 4.88       | 4.99        | 5.00       | 4.99        | 4.97       | -11.2                | -1.8      | -7.1   |

| Lake                | Date<br>lake<br>sampled | Depth<br>of<br>integ.<br>sample<br>m | pH             |               |                |               |                |               | Alkalinity/Acidity |           |        |
|---------------------|-------------------------|--------------------------------------|----------------|---------------|----------------|---------------|----------------|---------------|--------------------|-----------|--------|
|                     |                         |                                      | Surface        |               | Lake ave.      |               | Integ.         |               | Surface            | Lake ave. | Integ. |
|                     |                         |                                      | before<br>aer. | after<br>aer. | before<br>aer. | after<br>aer. | before<br>aer. | after<br>aer. | µeq/L              |           |        |
| Bog P.              | 5/23/78                 | 4.0                                  | 5.19           | 5.92          | ND             | ND            | 5.15           | 5.42          | 19.3               | ND        | -1.5   |
|                     | 7/12/78                 | 4.0                                  | 5.31           | 5.51          | ND             | ND            | 5.45           | 6.53          | 14.1               | ND        | 27.7   |
|                     | 8/10/78                 | 3.0                                  | 5.38           | 5.35          | ND             | ND            | 5.52           | 6.51          | -7.4               | ND        | 36.4   |
|                     | 5/25/79                 | 3.5                                  | 5.14           | 5.37          | 5.18           | 5.51          | 5.18           | 5.54          | -2.8               | 17.7      | 19.7   |
|                     | 6/26/79                 | 3.5                                  | 5.12           | 5.19          | 5.36           | 5.40          | 5.23           | 5.40          | 3.4                | 61.0      | 65.6   |
|                     | 8/23/79                 | 4.0                                  | 5.50           | 5.50          | 5.53           | 5.60          | 5.57           | 5.73          | 7.3                | 41.4      | 85.1   |
| Cat Mt. P.          | 7/9/78                  | 9.0                                  | 4.98           | 4.97          | ND             | ND            | 5.12           | 5.30          | -5.2               | ND        | 4.1    |
|                     | 8/19/78                 | 9.0                                  | 5.12           | 4.99          | ND             | ND            | 5.43           | 5.52          | -5.7               | ND        | 4.6    |
|                     | 5/11/79                 | 8.0                                  | 5.08           | 5.10          | 5.10           | 5.16          | ND             | ND            | ND                 | ND        | ND     |
|                     | 6/11/79                 | 9.0                                  | 5.07           | 5.16          | 5.14           | 5.17          | 5.19           | 5.42          | -2.3               | 1.8       | 4.6    |
|                     | 8/17/79                 | 7.0                                  | 5.13           | 5.11          | 5.12           | 5.07          | 5.12           | 5.07          | -5.5               | -5.7      | -7.1   |
| Clear P.            | 5/12/78                 | 13.0                                 | ND             | ND            | ND             | ND            | 6.64           | 7.14          | ND                 | ND        | 123.9  |
|                     | 6/20/78                 | 14.0                                 | 7.14           | 7.30          | ND             | ND            | 6.75           | 7.25          | 120.0              | ND        | 148.0  |
|                     | 7/15/78                 | 16.0                                 | 7.10           | 7.31          | ND             | ND            | 6.69           | 7.38          | 124.3              | ND        | 147.1  |
|                     | 8/9/78                  | 13.0                                 | 7.14           | 7.31          | ND             | ND            | 7.02           | 7.39          | 125.9              | ND        | 138.1  |
|                     | 5/8/79                  | 16.0                                 | 6.96           | 6.97          | 6.79           | 7.05          | 6.57           | 7.01          | 107.8              | 140.4     | 137.8  |
|                     | 6/9/79                  | 16.0                                 | 7.00           | 7.17          | 6.76           | 7.23          | 6.58           | 7.29          | 114.1              | 132.7     | 147.0  |
|                     | 8/7/79                  | 16.0                                 | 6.70           | 7.27          | 6.70           | 7.37          | 6.64           | 7.39          | 114.1              | 113.4     | 137.8  |
| Copperas P.<br>(FC) | 5/15/78                 | 5.0                                  | ND             | ND            | ND             | ND            | ND             | ND            | ND                 | ND        | ND     |
|                     | 6/8/78                  | 6.0                                  | 7.97           | 7.84          | ND             | ND            | 7.05           | 7.86          | 350.0              | ND        | 386.0  |
|                     | 7/14/78                 | 5.0                                  | 7.80           | 7.87          | ND             | ND            | 7.32           | 7.71          | 384.2              | ND        | 364.6  |
|                     | 8/5/78                  | 5.0                                  | 7.52           | 7.76          | ND             | ND            | 7.18           | 7.80          | 393.4              | ND        | 417.5  |
|                     | 5/21/79                 | 6.0                                  | 7.49           | 7.65          | 7.45           | 7.69          | 6.98           | 7.77          | 312.4              | 337.5     | 413.7  |
|                     | 6/23/79                 | 6.0                                  | 7.76           | 7.69          | 7.45           | 7.71          | 7.00           | 7.79          | 359.3              | 383.8     | 453.5  |
|                     | 8/27/79                 | 4.0                                  | 7.74           | 7.80          | 7.35           | 7.78          | 7.24           | 7.80          | 395.9              | 405.3     | 406.6  |

| Lake                | Date<br>lake<br>sampled | Depth<br>of<br>integ.<br>sample<br>m | pH             |               |                |               |                |               | Alkalinity/Acidity |           |        |
|---------------------|-------------------------|--------------------------------------|----------------|---------------|----------------|---------------|----------------|---------------|--------------------|-----------|--------|
|                     |                         |                                      | Surface        |               | Lake ave.      |               | Integ.         |               | Surface            | Lake ave. | Integ. |
|                     |                         |                                      | before<br>aer. | after<br>aer. | before<br>aer. | after<br>aer. | before<br>aer. | after<br>aer. | µeq/L              |           |        |
| Copperas P.<br>(WN) | 5/11/78                 | 16.0                                 | 6.63           | 7.26          | ND             | ND            | 6.82           | 7.27          | 150.0              | ND        | 164.0  |
|                     | 6/14/78                 | 13.0                                 | 7.36           | 7.30          | ND             | ND            | 6.69           | 7.33          | 134.0              | ND        | 146.0  |
|                     | 7/13/78                 | 13.0                                 | 7.34           | 7.43          | ND             | ND            | 6.84           | 7.39          | 138.9              | ND        | 147.2  |
|                     | 8/8/78                  | 12.0                                 | 7.53           | 7.53          | ND             | ND            | 6.81           | 7.38          | 203.9              | ND        | 170.0  |
|                     | 5/10/79                 | 16.0                                 | 7.14           | 7.05          | 6.76           | 7.11          | 6.66           | 7.06          | 137.3              | 162.1     | 146.5  |
|                     | 6/6/79                  | 16.0                                 | 7.27           | 7.20          | 6.73           | 7.33          | 6.56           | 7.28          | 131.3              | 164.9     | 165.3  |
|                     | 8/5/79                  | 16.0                                 | 7.32           | 7.35          | 6.97           | 7.42          | 6.57           | 7.42          | 185.1              | 179.4     | 181.3  |
| Cowhorn P.          | 5/25/78                 | 12.5                                 | 5.88           | 6.04          | ND             | ND            | 5.64           | 6.26          | 10.0               | ND        | 24.0   |
|                     | 7/9/78                  | 6.0                                  | 6.15           | 6.38          | ND             | ND            | 5.81           | 6.42          | 34.0               | ND        | 34.0   |
|                     | 8/19/78                 | 7.0                                  | 6.32           | 6.40          | ND             | ND            | 5.88           | 6.67          | 26.3               | ND        | 35.9   |
|                     | 5/11/79                 | 13.0                                 | 5.30           | 5.48          | 5.59           | 6.13          | 5.16           | 5.42          | 1.7                | 21.5      | 3.6    |
|                     | 6/11/79                 | 12.0                                 | 6.29           | 6.26          | 5.96           | 6.39          | 5.68           | 6.46          | 29.1               | 25.9      | 30.7   |
|                     | 8/17/79                 | 13.0                                 | 6.27           | 6.23          | 6.04           | 6.56          | 6.30           | 7.08          | 36.9               | 54.9      | 140.1  |
| Crane Mt. P.        | 5/18/78                 | 6.0                                  | 6.39           | 6.72          | ND             | ND            | 6.30           | 6.73          | 46.0               | ND        | 58.0   |
|                     | 6/16/78                 | 6.0                                  | 6.55           | 6.59          | ND             | ND            | 6.28           | 6.74          | 34.0               | ND        | 64.0   |
|                     | 8/1/78                  | 5.0                                  | 6.40           | 6.65          | ND             | ND            | 6.41           | 6.67          | 77.6               | ND        | 78.8   |
|                     | 5/7/79                  | 5.0                                  | 6.23           | 6.27          | 6.23           | 6.33          | 6.05           | 6.25          | 32.5               | 34.5      | 42.4   |
|                     | 6/12/79                 | 5.0                                  | 6.31           | 6.45          | 6.35           | 6.50          | 6.21           | 6.57          | 22.7               | 29.8      | 37.9   |
|                     | 8/16/79                 | 5.5                                  | 6.44           | 6.54          | 6.56           | 6.62          | 6.53           | 6.62          | 38.2               | 38.7      | 44.3   |
| Deep L.             | 5/27/78                 | 17.0                                 | 4.64           | 4.62          | ND             | ND            | 4.70           | 4.73          | -22.0              | ND        | -12.0  |
|                     | 6/28/78                 | 13.0                                 | 4.67           | 4.63          | ND             | ND            | 4.66           | 4.69          | -10.0              | ND        | -8.0   |
|                     | 8/7/78                  | 16.0                                 | 4.72           | 4.66          | ND             | ND            | 4.82           | 4.76          | -39.6              | ND        | -6.7   |
|                     | 5/31/79                 | 16.0                                 | 4.69           | 4.69          | 4.62           | 4.62          | 4.71           | 4.72          | -8.1               | -21.3     | 22.6   |
|                     | 6/24/79                 | 16.0                                 | 4.65           | 4.74          | 4.70           | 4.70          | 4.69           | 4.65          | -15.6              | -25.5     | 12.1   |
|                     | 9/1/79                  | 16.0                                 | 4.70           | 4.67          | 4.67           | 4.68          | 4.68           | 4.68          | -14.1              | -13.5     | -17.7  |

| Lake           | Date<br>lake<br>sampled | Depth<br>of<br>integ.<br>sample<br>m | pH             |               |                |               |                |               | Alkalinity/Acidity |           |        |
|----------------|-------------------------|--------------------------------------|----------------|---------------|----------------|---------------|----------------|---------------|--------------------|-----------|--------|
|                |                         |                                      | Surface        |               | Lake ave.      |               | Integ.         |               | Surface            | Lake ave. | Integ. |
|                |                         |                                      | before<br>aer. | after<br>aer. | before<br>aer. | after<br>aer. | before<br>aer. | after<br>aer. | µeq/L              |           |        |
|                |                         |                                      |                |               |                |               |                |               |                    |           |        |
| Deer L.        | 5/30/78                 | 3.0                                  | 6.72           | 6.93          | ND             | ND            | 6.82           | 6.89          | 92.0               | ND        | 92.0   |
|                | 6/6/78                  | 3.0                                  | 6.94           | 7.23          | ND             | ND            | 6.99           | 7.26          | 104.0              | ND        | 128.0  |
|                | 7/24/78                 | 3.0                                  | 6.63           | 6.95          | ND             | ND            | 6.46           | 7.02          | 119.2              | ND        | 105.9  |
|                | 8/13/78                 | 3.0                                  | 6.95           | 7.24          | ND             | ND            | 7.00           | 7.23          | 110.9              | ND        | 113.0  |
|                | 5/28/79                 | 3.0                                  | 6.90           | 7.02          | 6.89           | 7.02          | 6.87           | 7.03          | 99.6               | 99.7      | 92.1   |
|                | 6/20/79                 | 3.0                                  | 7.49           | 7.51          | 7.02           | 7.51          | 6.55           | 7.65          | 303.5              | 262.9     | 366.2  |
|                | 8/25/79                 | 3.0                                  | 6.96           | 7.23          | 6.88           | 7.23          | 6.88           | 7.23          | 116.0              | 112.8     | 115.0  |
| Dunk P.        | 5/17/78                 | 12.0                                 | 7.04           | 7.44          | ND             | ND            | 7.24           | 7.44          | 231.5              | ND        | 237.4  |
|                | 6/22/78                 | 8.0                                  | 7.45           | 7.61          | ND             | ND            | 6.80           | 7.62          | 236.0              | ND        | 238.0  |
|                | 7/26/78                 | 8.6                                  | 7.71           | 7.70          | ND             | ND            | 6.70           | 7.70          | 268.0              | ND        | 260.0  |
|                | 8/11/78                 | 9.2                                  | 7.20           | 7.56          | ND             | ND            | 6.40           | 7.51          | 270.5              | ND        | 265.9  |
|                | 5/31/79                 | 12.0                                 | 7.13           | 7.42          | 6.96           | 7.40          | 6.66           | 7.59          | 190.9              | 172.6     | 344.1  |
|                | 6/28/79                 | 12.0                                 | 7.49           | 7.51          | 7.02           | 7.51          | 6.55           | 7.65          | 303.6              | 262.9     | 366.2  |
|                | 8/28/79                 | 12.0                                 | 7.31           | 7.57          | 7.03           | 7.51          | 6.62           | 7.65          | 273.1              | 322.7     | 372.7  |
| E. Copperas P. | 5/15/78                 | 4.0                                  | 4.50           | 4.40          | ND             | ND            | 4.93           | 4.95          | -56.0              | ND        | -4.0   |
|                | 6/8/78                  | 4.0                                  | 4.58           | 4.55          | ND             | ND            | 4.86           | 5.09          | -24.0              | ND        | 2.0    |
|                | 7/14/78                 | 4.0                                  | 4.57           | 4.55          | ND             | ND            | 4.69           | 4.68          | -32.3              | ND        | -16.5  |
|                | 8/5/78                  | 4.0                                  | 4.56           | 4.50          | ND             | ND            | 4.62           | 4.62          | -33.5              | ND        | -23.7  |
|                | 5/21/79                 | 4.0                                  | 4.46           | 4.43          | 4.64           | 4.61          | 4.81           | 4.90          | 11.1               | -16.1     | 0.6    |
|                | 6/23/79                 | 4.0                                  | 4.50           | 4.48          | 4.60           | 4.61          | 4.60           | 4.45          | -13.6              | -14.2     | -20.4  |
|                | 8/27/79                 | 4.0                                  | 4.47           | 4.48          | 4.64           | 4.64          | 4.43           | 4.43          | -33.2              | -19.7     | -41.9  |
| Frank P.       | 6/22/78                 | 11.5                                 | 6.50           | 6.72          | ND             | ND            | 6.09           | 6.77          | ND                 | ND        | 49.7   |
|                | 7/26/78                 | 11.0                                 | 6.64           | 6.82          | ND             | ND            | 6.16           | 6.90          | 37.8               | ND        | 50.6   |
|                | 8/11/78                 | 9.0                                  | 6.45           | 6.64          | ND             | ND            | 6.46           | 6.72          | 37.5               | ND        | 47.0   |
|                | 5/31/79                 | 11.0                                 | 6.24           | 6.50          | 6.27           | 6.49          | 5.96           | 6.63          | 22.0               | 30.8      | 34.9   |
|                | 6/28/79                 | 11.0                                 | 6.40           | 6.48          | 6.30           | 6.62          | 5.98           | 6.70          | 30.2               | 35.3      | 41.7   |
|                | 8/28/79                 | 11.0                                 | 6.32           | 6.55          | 6.21           | 6.57          | 6.01           | 6.69          | 36.9               | 41.6      | 46.7   |

| Lake             | Date<br>lake<br>sampled | Depth<br>of<br>integ.<br>sample<br>m | pH             |               |                |               |                |               | Alkalinity/Acidity |           |        |
|------------------|-------------------------|--------------------------------------|----------------|---------------|----------------|---------------|----------------|---------------|--------------------|-----------|--------|
|                  |                         |                                      | Surface        |               | Lake ave.      |               | Integ.         |               | Surface            | Lake ave. | Integ. |
|                  |                         |                                      | before<br>aer. | after<br>aer. | before<br>aer. | after<br>aer. | before<br>aer. | after<br>aer. | µeq/L              |           |        |
| Giant's Washbowl | 5/10/78                 | 7.0                                  | 6.61           | 7.08          | ND             | ND            | 6.80           | 7.30          | 94.5               | ND        | 148.3  |
|                  | 6/6/78                  | 10.0                                 | 7.01           | 7.29          | ND             | ND            | 6.82           | 7.36          | 126.0              | ND        | 160.0  |
|                  | 7/13/78                 | 5.0                                  | 7.15           | 7.40          | ND             | ND            | 7.18           | 7.48          | 158.9              | ND        | 158.9  |
|                  | 8/8/78                  | 5.0                                  | 7.16           | 7.41          | ND             | ND            | 7.05           | 7.52          | 178.8              | ND        | 210.2  |
|                  | 5/5/79                  | 6.0                                  | 6.53           | 6.82          | 6.62           | 6.82          | 6.46           | 6.82          | 50.0               | 50.1      | 50.1   |
|                  | 6/6/79                  | 5.0                                  | 6.77           | 7.25          | 6.79           | 7.26          | 6.73           | 7.29          | 114.0              | 108.4     | 120.6  |
|                  | 8/4/79                  | 6.0                                  | 7.10           | 7.33          | 7.06           | 7.39          | 6.88           | 7.47          | 158.7              | 225.7     | 209.8  |
| Green P.         | 5/23/78                 | 8.0                                  | 5.87           | 6.14          | ND             | ND            | 5.73           | ND            | 16.0               | ND        | 26.0   |
|                  | 7/12/78                 | 8.5                                  | 6.21           | 6.27          | ND             | ND            | 6.16           | 6.48          | -1.9               | ND        | 28.4   |
|                  | 8/10/78                 | 7.0                                  | 6.01           | 6.22          | ND             | ND            | 6.17           | 6.23          | 6.9                | ND        | 6.9    |
|                  | 5/25/79                 | 8.0                                  | ND             | ND            | 5.99           | 6.15          | 5.87           | 6.24          | ND                 | 16.3      | 15.3   |
|                  | 6/26/79                 | 7.0                                  | 6.09           | 6.08          | 6.01           | 6.13          | 5.94           | 6.26          | 16.4               | 13.8      | 18.4   |
|                  | 8/23/79                 | 7.0                                  | 6.32           | 6.24          | 6.30           | 6.32          | 6.23           | 6.34          | 16.3               | 23.4      | 16.9   |
| Gull P.          | 5/12/78                 | 11.0                                 | 6.87           | 7.27          | ND             | ND            | 6.61           | 7.40          | 149.9              | ND        | 199.6  |
|                  | 6/20/78                 | 7.0                                  | 7.44           | 7.24          | ND             | ND            | 6.80           | 7.33          | 112.0              | ND        | 124.0  |
|                  | 7/15/78                 | 9.0                                  | 7.02           | 7.29          | ND             | ND            | 6.66           | 7.46          | 128.0              | ND        | 164.0  |
|                  | 8/9/78                  | 11.0                                 | 7.08           | 7.27          | ND             | ND            | 6.53           | 7.55          | 130.5              | ND        | 257.4  |
|                  | 5/8/79                  | 10.5                                 | 6.70           | 6.94          | 6.57           | 7.06          | 6.51           | 7.18          | 132.4              | 211.2     | 210.1  |
|                  | 6/9/79                  | 11.0                                 | 7.30           | 7.34          | 6.70           | 7.32          | 6.43           | 7.45          | 98.1               | 167.7     | 227.0  |
|                  | 8/7/79                  | 11.0                                 | 6.90           | 7.40          | 6.63           | 7.58          | 6.52           | 7.62          | 152.1              | 204.1     | 259.1  |
| Heart L.         | 5/14/78                 | 12.5                                 | 6.22           | 6.60          | ND             | ND            | 6.21           | 6.48          | 30.0               | ND        | 32.0   |
|                  | 6/4/78                  | 10.0                                 | 6.61           | 6.69          | ND             | ND            | 6.12           | 6.67          | 42.0               | ND        | 50.0   |
|                  | 7/22/78                 | 9.0                                  | 6.90           | 6.61          | ND             | ND            | 6.58           | 6.74          | 39.1               | ND        | 40.2   |
|                  | 8/16/78                 | 13.0                                 | 6.80           | 6.62          | ND             | ND            | 6.60           | 6.91          | 72.6               | ND        | 96.1   |
|                  | 5/16/79                 | 12.0                                 | 6.47           | 6.42          | 6.24           | 6.45          | 6.05           | 6.49          | 38.8               | 36.0      | 38.5   |
|                  | 6/16/79                 | 12.0                                 | 6.64           | 6.47          | 6.40           | 6.74          | 6.00           | 6.68          | 26.6               | 36.1      | 47.5   |
|                  | 8/11/79                 | 13.0                                 | 6.57           | 6.59          | 6.35           | 6.69          | 6.11           | 6.98          | 33.0               | 39.0      | 80.6   |

| Lake                  | Date lake sampled | Depth of integ. sample m | pH          |            |             |            |             |            | Alkalinity/Acidity |           |        |
|-----------------------|-------------------|--------------------------|-------------|------------|-------------|------------|-------------|------------|--------------------|-----------|--------|
|                       |                   |                          | Surface     |            | Lake ave.   |            | Integ.      |            | Surface            | Lake ave. | Integ. |
|                       |                   |                          | before aer. | after aer. | before aer. | after aer. | before aer. | after aer. | µeq/L              |           |        |
| Huntley P.            | 5/17/78           | 10.5                     | 7.19        | 7.68       | ND          | ND         | 6.98        | 7.73       | 330.9              | ND        | 446.0  |
|                       | 6/22/78           | ND                       | 7.66        | 7.82       | ND          | ND         | ND          | ND         | 378.0              | ND        | ND     |
|                       | 7/26/78           | 6.4                      | 7.89        | 7.93       | ND          | ND         | 7.27        | 7.90       | 419.6              | ND        | 425.4  |
|                       | 8/12/78           | 6.0                      | 8.54        | 7.82       | ND          | ND         | 6.86        | 7.92       | 487.0              | ND        | 541.7  |
|                       | 5/31/79           | 12.0                     | 7.51        | 7.64       | 7.20        | 7.68       | 7.00        | 7.72       | 381.4              | 395.5     | 387.4  |
|                       | 6/28/79           | 12.0                     | 7.85        | 7.69       | 7.14        | 7.69       | 6.87        | 7.79       | 404.1              | 409.5     | 446.7  |
|                       | 8/28/79           | 11.0                     | 7.85        | 7.77       | 7.18        | 7.75       | 6.91        | 7.77       | 456.5              | 495.7     | 533.6  |
| Jenkins P.            | 6/1/78            | 13.0                     | 6.19        | 6.10       | ND          | ND         | 5.90        | 6.12       | 10.0               | ND        | 16.0   |
|                       | 7/31/78           | 16.0                     | 6.33        | 6.55       | ND          | ND         | 6.21        | 6.51       | 75.0               | ND        | 67.0   |
|                       | 6/4/79            | 16.0                     | 6.19        | 6.34       | 5.69        | 5.98       | 5.69        | 5.98       | 27.2               | 8.3       | 8.3    |
|                       | 7/6/79            | ND                       | 6.39        | 6.44       | ND          | ND         | ND          | ND         | 13.4               | ND        | ND     |
|                       | 8/30/79           | 16.0                     | 6.52        | 6.58       | 6.31        | 6.53       | 6.23        | 6.60       | 11.1               | 31.5      | 32.0   |
| L. Arnold             | 5/23/79           | 2.0                      | 4.80        | 4.77       | 4.80        | 4.76       | 4.77        | 4.76       | -15.4              | -12.9     | -10.1  |
|                       | 8/2/79            | 2.0                      | 4.88        | 4.87       | 4.88        | 4.87       | 4.86        | 4.84       | -10.1              | -9.0      | -10.2  |
| L. Colden             | 6/23/78           | 7.0                      | 4.99        | 5.12       | ND          | ND         | 5.03        | 5.04       | 0.0                | ND        | 0.0    |
|                       | 8/17/78           | 5.0                      | 4.79        | 4.87       | ND          | ND         | 5.17        | 4.97       | -3.9               | ND        | -2.4   |
|                       | 8/9/79            | -                        | 4.96        | 4.94       | ND          | ND         | ND          | ND         | -9.0               | ND        | ND     |
| L. Tear of the Clouds | 5/22/79           | 0.5                      | 4.63        | 4.63       | 4.63        | 4.63       | 4.63        | 4.63       | -37.3              | -37.3     | -37.3  |
|                       | 8/2/79            | 0.5                      | 4.65        | 4.57       | 4.65        | 4.57       | 4.65        | 4.67       | -25.5              | -25.5     | -25.5  |
| Little Pine P.        | 8/4/78            | 1.0                      | ND          | ND         | ND          | ND         | 8.16        | 7.88       | ND                 | ND        | 460.0  |
|                       | 5/9/79            | 1.0                      | 7.81        | 7.62       | 7.70        | 7.54       | 7.81        | 7.56       | 340.9              | 359.9     | 329.8  |
|                       | 6/8/79            | 1.0                      | 7.47        | 7.84       | 7.50        | 7.86       | 7.50        | 7.83       | 379.6              | 382.5     | 379.7  |
|                       | 8/6/79            | 1.0                      | 7.17        | 7.80       | 7.01        | 7.80       | 7.01        | 7.80       | 454.2              | 461.0     | 461.0  |

| Lake              | Date<br>lake<br>sampled | Depth<br>of<br>integ.<br>sample<br>m | pH             |               |                |               |                |               | Alkalinity/Acidity |           |        |
|-------------------|-------------------------|--------------------------------------|----------------|---------------|----------------|---------------|----------------|---------------|--------------------|-----------|--------|
|                   |                         |                                      | Surface        |               | Lake ave.      |               | Integ.         |               | Surface            | Lake ave. | Integ. |
|                   |                         |                                      | before<br>aer. | after<br>aer. | before<br>aer. | after<br>aer. | before<br>aer. | after<br>aer. | µeq/L              |           |        |
| Little Shallow P. | 5/26/78                 | 1.0                                  | 6.75           | 7.25          | ND             | ND            | 6.67           | 7.26          | 165.7              | ND        | 139.8  |
|                   | 7/10/78                 | 1.5                                  | 6.70           | 7.37          | ND             | ND            | 6.68           | 7.39          | 152.3              | ND        | 153.4  |
|                   | 8/20/78                 | 1.0                                  | 6.42           | 7.29          | ND             | ND            | 6.68           | 7.29          | 172.0              | ND        | 187.5  |
|                   | 5/12/79                 | 1.5                                  | 6.75           | 7.22          | 6.75           | 7.08          | 6.77           | 7.16          | 120.8              | 119.7     | 128.4  |
|                   | 6/13/79                 | 1.5                                  | 6.70           | 7.25          | 6.74           | 7.27          | 6.76           | 7.27          | 144.7              | 153.3     | 113.5  |
|                   | 8/20/79                 | 1.0                                  | 6.63           | 7.32          | 6.60           | 7.32          | 6.60           | 7.32          | 191.4              | 188.2     | 188.2  |
|                   |                         |                                      |                |               |                |               |                |               |                    |           |        |
| Livingston P.     | 6/24/78                 | 7.0                                  | 5.25           | 5.34          | ND             | ND            | 5.49           | 5.89          | 4.0                | ND        | 10.0   |
|                   | 7/20/78                 | 7.0                                  | 5.63           | 6.19          | ND             | ND            | 5.57           | 5.61          | 4.9                | ND        | 7.7    |
|                   | 8/17/78                 | 7.0                                  | 6.02           | 5.79          | ND             | ND            | 6.16           | 6.19          | 6.5                | ND        | 22.9   |
|                   | 5/18/79                 | 7.0                                  | 5.20           | 5.26          | 5.24           | 5.35          | 5.47           | 6.00          | 1.2                | 4.1       | 15.3   |
|                   | 6/19/79                 | 7.0                                  | 5.34           | 5.35          | 5.52           | 5.67          | 5.67           | 6.07          | 2.7                | 10.8      | 2.4    |
|                   | 8/9/79                  | 7.0                                  | 5.76           | 5.88          | 5.78           | 5.95          | 5.86           | 6.32          | 7.2                | 6.4       | 20.3   |
|                   |                         |                                      |                |               |                |               |                |               |                    |           |        |
| Long P.           | 6/1/78                  | 5.5                                  | 5.44           | 5.29          | ND             | ND            | 5.37           | 5.46          | 0.0                | ND        | 8.0    |
|                   | 7/31/78                 | 6.0                                  | 5.93           | 6.06          | ND             | ND            | 6.11           | 6.22          | 12.5               | ND        | 56.4   |
|                   | 6/4/79                  | 6.0                                  | 5.48           | 5.60          | 5.50           | 5.65          | 5.54           | 5.80          | 7.2                | 11.3      | 12.4   |
|                   | 7/6/79                  | 6.0                                  | 5.97           | 6.18          | 5.90           | 6.20          | 5.81           | 6.21          | 18.4               | 17.5      | 16.8   |
|                   | 8/30/79                 | 6.0                                  | 6.21           | 6.46          | 6.25           | 6.44          | 6.21           | 6.44          | 41.2               | 41.8      | 32.5   |
|                   |                         |                                      |                |               |                |               |                |               |                    |           |        |
| Mountain P.       | 5/21/78                 | 13.0                                 | 4.62           | 4.63          | ND             | ND            | 4.89           | 5.02          | -20.0              | ND        | -20.0  |
|                   | 6/13/78                 | 11.9                                 | 4.78           | 4.81          | ND             | ND            | 4.91           | 4.97          | -20.4              | ND        | -9.5   |
|                   | 7/22/78                 | 8.5                                  | 4.74           | 4.70          | ND             | ND            | 4.78           | 4.74          | -17.0              | ND        | -28.8  |
|                   | 8/18/78                 | 8.0                                  | 4.71           | 4.62          | ND             | ND            | 4.95           | 4.93          | -15.8              | ND        | -7.8   |
|                   | 5/14/79                 | 12.0                                 | 4.72           | 4.73          | 4.76           | 4.75          | 4.69           | 4.70          | -9.4               | -12.4     | -11.1  |
|                   | 6/5/79                  | 13.0                                 | 4.70           | 4.70          | 4.75           | 4.73          | 4.74           | 4.72          | -5.1               | -15.4     | -14.6  |
|                   | 8/22/79                 | 12.0                                 | 4.71           | 4.65          | 4.71           | 4.72          | 4.97           | 5.05          | -23.9              | -15.3     | -8.4   |
|                   |                         |                                      |                |               |                |               |                |               |                    |           |        |

| Lake      | Date<br>lake<br>sampled | Depth<br>of<br>integ.<br>sample<br>m | pH             |               |                |               |                |               | Alkalinity/Acidity |           |        |
|-----------|-------------------------|--------------------------------------|----------------|---------------|----------------|---------------|----------------|---------------|--------------------|-----------|--------|
|           |                         |                                      | Surface        |               | Lake ave.      |               | Integ.         |               | Surface            | Lake ave. | Integ. |
|           |                         |                                      | before<br>aer. | after<br>aer. | before<br>aer. | after<br>aer. | before<br>aer. | after<br>aer. | µeq/L              |           |        |
| Nick's P. | 5/31/78                 | 5.5                                  | 5.05           | 4.93          | ND             | ND            | 5.10           | 5.21          | -12.0              | ND        | 4.0    |
|           | 7/8/78                  | 6.0                                  | 5.25           | 5.32          | ND             | ND            | 5.23           | 5.35          | 6.4                | ND        | 7.2    |
|           | 7/17/78                 | 5.5                                  | 5.13           | 5.16          | ND             | ND            | 5.32           | 5.39          | 1.5                | ND        | 1.5    |
|           | 8/14/78                 | 4.0                                  | 5.16           | 5.12          | ND             | ND            | ND             | 5.09          | 0.0                | ND        | 22.0   |
|           | 5/18/79                 | 5.0                                  | 5.01           | 5.05          | 5.01           | 5.09          | 5.09           | 5.23          | -2.0               | -2.9      | 0.0    |
|           | 6/22/79                 | 5.0                                  | 5.22           | 5.22          | 5.23           | 5.30          | 5.23           | 5.32          | -0.1               | 2.5       | 12.3   |
|           | 8/22/79                 | 5.0                                  | 5.46           | 5.58          | 5.43           | 5.44          | 5.42           | 5.51          | 3.3                | 2.9       | 2.8    |
|           |                         |                                      |                |               |                |               |                |               |                    |           |        |
| Parch P.  | 6/27/78                 | 10.5                                 | 7.12           | 7.22          | ND             | ND            | 6.46           | 7.25          | 84.0               | ND        | 106.0  |
|           | 8/6/78                  | 9.0                                  | 6.82           | 6.96          | ND             | ND            | 6.49           | 7.02          | 96.3               | ND        | 83.0   |
|           | 5/6/79                  | 11.0                                 | 6.65           | 6.63          | 6.55           | 6.75          | 6.38           | 6.70          | 83.1               | 90.1      | 92.3   |
|           | 6/7/79                  | 10.0                                 | 6.98           | 7.09          | 6.64           | 7.16          | 6.35           | 7.23          | 72.7               | 92.0      | 105.8  |
|           | 8/8/79                  | 11.0                                 | 6.40           | 7.08          | 6.53           | 7.15          | 6.34           | 7.23          | 81.4               | 115.1     | 89.1   |
| Pine P.   | 5/22/78                 | 16.5                                 | 6.86           | 6.98          | ND             | ND            | 6.52           | 7.04          | 68.8               | ND        | 93.2   |
|           | 6/17/78                 | 11.0                                 | 7.01           | 7.10          | ND             | ND            | 6.96           | 7.10          | 71.6               | ND        | 75.4   |
|           | 8/4/78                  | 16.0                                 | 6.94           | 7.07          | ND             | ND            | 6.66           | 7.16          | 68.1               | ND        | 88.9   |
|           | 5/9/79                  | 16.0                                 | 6.78           | 6.82          | 6.70           | 6.88          | 6.68           | 6.93          | 78.7               | 82.9      | 64.4   |
|           | 6/8/79                  | 14.0                                 | 6.96           | 7.04          | 6.93           | 7.04          | 6.85           | 7.07          | 72.3               | 72.9      | 72.3   |
|           | 8/6/79                  | 16.0                                 | 6.80           | 6.95          | 6.71           | 7.05          | 6.64           | 7.06          | 104.9              | 79.9      | 83.9   |
| Rock P.   | 5/11/78                 | 9.0                                  | ND             | ND            | ND             | ND            | 6.30           | 7.08          | ND                 | ND        | 107.0  |
|           | 6/14/78                 | 9.2                                  | 6.76           | 6.81          | ND             | ND            | 6.12           | 7.05          | 98.0               | ND        | 60.0   |
|           | 7/16/78                 | 9.0                                  | 6.69           | 6.99          | ND             | ND            | 6.22           | 7.15          | 73.3               | ND        | 101.3  |
|           | 8/3/78                  | 7.5                                  | 6.82           | 7.05          | ND             | ND            | 6.32           | 7.17          | 76.2               | ND        | 59.8   |
|           | 5/4/79                  | 9.0                                  | 6.59           | 6.35          | 6.29           | 6.45          | 6.11           | 6.50          | 70.0               | 76.1      | 98.3   |
|           | 6/5/79                  | 10.0                                 | 6.66           | 6.90          | 6.72           | 7.02          | 6.52           | 7.14          | 72.6               | 81.1      | 103.2  |
|           | 8/5/79                  | 9.0                                  | 6.90           | 7.02          | 6.39           | 7.11          | 6.33           | 7.25          | 82.0               | 114.0     | 130.4  |



| Lake              | Date<br>lake<br>sampled | Depth<br>of<br>integ.<br>sample<br>m | pH             |               |                |               |                |               | Alkalinity/Acidity |           |        |
|-------------------|-------------------------|--------------------------------------|----------------|---------------|----------------|---------------|----------------|---------------|--------------------|-----------|--------|
|                   |                         |                                      | Surface        |               | Lake ave.      |               | Integ.         |               | Surface            | Lake ave. | Integ. |
|                   |                         |                                      | before<br>aer. | after<br>aer. | before<br>aer. | after<br>aer. | before<br>aer. | after<br>aer. | µeq/L              |           |        |
| Round P.          | 5/10/78                 | 9.5                                  | 6.43           | 6.84          | ND             | ND            | 6.44           | 6.84          | 64.0               | ND        | 64.0   |
|                   | 6/6/78                  | 10.0                                 | 6.82           | 7.09          | ND             | ND            | 6.30           | 7.03          | 76.0               | ND        | 86.6   |
|                   | 7/19/78                 | 10.0                                 | 6.91           | 7.02          | ND             | ND            | 6.43           | 7.14          | 68.7               | ND        | 90.5   |
|                   | 8/16/78                 | 9.5                                  | 7.12           | 6.98          | ND             | ND            | 6.60           | ND            | 73.9               | ND        | 100.8  |
|                   | 5/17/79                 | 9.0                                  | 6.71           | 6.86          | 6.56           | 6.89          | 6.40           | 6.87          | 61.5               | 66.6      | 69.0   |
|                   | 6/18/79                 | 9.0                                  | 6.72           | 7.03          | 6.62           | 7.03          | 6.51           | 7.05          | 62.8               | 62.0      | 64.1   |
|                   | 8/13/79                 | 10.0                                 | 6.97           | 6.98          | 6.63           | 7.05          | 6.41           | 7.15          | 73.4               | 89.6      | 102.8  |
| Upper Wallface P. | 6/10/78                 | 8.0                                  | 4.96           | 5.07          | ND             | ND            | 5.01           | 5.06          | -4.0               | ND        | 0.0    |
|                   | 7/18/78                 | 7.0                                  | 4.98           | 5.00          | ND             | ND            | 4.98           | 4.95          | 5.4                | ND        | 5.1    |
|                   | 8/15/78                 | 8.0                                  | 4.90           | 4.95          | ND             | ND            | 4.99           | 4.92          | -0.7               | ND        | -5.7   |
|                   | 5/15/79                 | 8.0                                  | 4.81           | 4.78          | 4.86           | 4.87          | 4.88           | 4.89          | 3.4                | -5.7      | 1.6    |
|                   | 6/17/79                 | 8.0                                  | 4.98           | 4.99          | 4.93           | 4.97          | 4.91           | 4.95          | -5.7               | -1.5      | -0.5   |
|                   | 8/12/79                 | 7.0                                  | 4.99           | 5.00          | 5.00           | 4.99          | 4.99           | 4.99          | -8.7               | -6.3      | -9.4   |
| Washbowl          | 5/26/78                 | 1.5                                  | 4.50           | 4.48          | ND             | ND            | 4.50           | 4.44          | -36.0              | ND        | -36.0  |
|                   | 7/10/78                 | 2.0                                  | 4.85           | 5.06          | ND             | ND            | 4.38           | 4.38          | 5.9                | ND        | -43.9  |
|                   | 8/20/78                 | 1.0                                  | 4.48           | 4.36          | ND             | ND            | 4.54           | 4.36          | -46.9              | ND        | -40.1  |
|                   | 5/12/79                 | 1.6                                  | 4.39           | 4.31          | 4.39           | 4.36          | 4.43           | 4.40          | -45.5              | -33.6     | -41.8  |
|                   | 6/13/79                 | 1.0                                  | 4.44           | 4.40          | 4.42           | 4.39          | 4.42           | 4.39          | -27.9              | -31.3     | -31.3  |
|                   | 8/20/79                 | 1.3                                  | 4.57           | 4.55          | 4.53           | 4.52          | 4.55           | 4.53          | -8.9               | -20.0     | -23.8  |
| Wolf L.           | 5/30/78                 | 12.5                                 | 6.47           | 6.80          | ND             | ND            | 6.55           | 6.77          | 48.0               | ND        | 56.0   |
|                   | 6/29/78                 | 11.0                                 | 6.84           | 7.00          | ND             | ND            | 6.55           | 6.50          | 72.0               | ND        | 68.0   |
|                   | 7/24/78                 | 10.5                                 | 7.67           | 7.27          | ND             | ND            | 6.65           | 7.35          | 60.0               | ND        | 79.4   |
|                   | 8/13/78                 | 11.0                                 | 6.83           | 7.02          | ND             | ND            | 6.39           | 7.04          | 78.0               | ND        | 72.0   |
|                   | 5/28/79                 | 12.0                                 | 6.71           | 6.85          | 6.64           | 6.86          | 6.42           | 6.90          | 17.7               | 106.6     | 80.2   |
|                   | 6/20/79                 | 11.0                                 | 6.80           | 6.92          | 6.33           | 6.93          | 6.45           | 6.97          | 57.4               | 64.0      | 74.3   |
|                   | 8/25/79                 | 12.0                                 | 6.90           | 7.07          | 6.74           | 7.07          | 6.42           | 7.10          | 82.0               | 80.5      | 113.2  |
