# Supplementary material
Source: publisher figshare collection journal article supplement (https://wiley.figshare.com/articles/dataset/_/3521588)
Supplement: Supplementary file 2 [file 1]

Table 9. Concentrations of Al and Si, ion balance analyses, and conductivity

1  
check analyses for Adirondack study lakes.

| Lake name    |        |        | 2     |       |      | 3           |     |      |      | 4            |       |      |
|--------------|--------|--------|-------|-------|------|-------------|-----|------|------|--------------|-------|------|
|              |        |        | Total | Max.  |      | Ion Balance |     |      |      | Conductivity |       |      |
|              | Sample | Sample | Al    | Al    | Si   | Sum         | Sum | Cat. | Pct. |              |       | Pct. |
| Lake name    | date   | type   | ug/L  | ueq/L | ug/L | cat.        | an. | -an. | err. | Meas.        | Calc. | err. |
| ARBUTUS L.   | 780530 | Int    |       |       | 4.9  | 223         | 210 | 13   | 3    | 28.2         | 28    | 1    |
|              | 780629 | Int    |       |       | 4.0  | 228         | 225 | 3    | 1    | 26.6         | 28    | -5   |
|              | 780813 | Surf   |       |       | 3.4  | 221         | 196 | 25   | 6    | 27.5         | 26    | 6    |
|              | 780813 | Bot    |       |       | 6.1  | 341         | 212 | 129  | 23   | 27.5         | 28    | -2   |
|              | 790825 | Surf   | 21    | 0     | 3.4  | 225         | 207 | 19   | 4    | 25.5         | 27    | -6   |
|              | 790825 | LA     | 30    | 0     | 6.1  | 229         | 215 | 14   | 3    | 25.5         | 28    | -9   |
|              | 790825 | Int    | 45    | 0     | 4.0  | 230         | 230 | 0    | 0    | 28.3         | 28    | 0    |
| AVALANCHE L. | 780623 | Int    |       |       | 3.3  | 116         | 138 | -21  | -8   | 20.2         | 21    | -3   |
|              | 780817 | Surf   |       |       | 3.9  | 138         | 188 | -50  | -15  | 21.7         | 26    | -22  |
|              | 780817 | Bot    |       |       | 4.3  | 390         | 141 | 249  | 47   | 25.4         | 37    | -45  |
|              | 790809 | Surf   | 455   | 34    | 3.9  | 179         | 157 | 22   | 7    | 27.4         | 25    | 11   |
|              | 790809 | LA     | 471   | 37    | 4.3  | 184         | 162 | 22   | 6    | 24.8         | 26    | -4   |
|              | 790809 | Int    | 476   | 35    | 3.3  | 180         | 162 | 18   | 5    | 24.2         | 25    | -3   |
| BEAR P.      | 780523 | Int    |       |       | 1.1  | 149         | 170 | -21  | -7   | 26.9         | 25    | 9    |
|              | 780712 | Int    |       |       | .4   | ID          | 190 | ID   | ID   | ND           | ID    | ID   |
|              | 780810 | Surf   |       |       | .2   | 160         | 156 | 4    | 1    | 26.0         | 24    | 7    |
|              | 780810 | Bot    |       |       | .6   | 169         | 172 | -3   | -1   | 26.1         | 27    | -2   |
|              | 790823 | Surf   | 96    | 7     | .2   | 166         | 156 | 10   | 3    | 24.6         | 26    | -4   |
|              | 790823 | LA     | 104   | 7     | .6   | 154         | 160 | -6   | -2   | 24.8         | 24    | 3    |
|              | 790823 | Int    | 104   | 7     | .4   | 156         | 152 | 4    | 1    | 25.2         | 24    | 6    |

|            |             |             | 2     |       | 3           |      |     |      | 4            |       |                 |
|------------|-------------|-------------|-------|-------|-------------|------|-----|------|--------------|-------|-----------------|
|            |             |             | Total | Max.  | Ion Balance |      |     |      | Conductivity |       |                 |
|            |             |             | Al    | Al    | Si          | Sum  | Sum | Cat. | Pct.         |       |                 |
| Lake name  | Sample date | Sample type | ug/L  | ueq/L | ug/L        | cat. | an. | -an. | err.         | Meas. | Pct. Calc. err. |
| <hr/>      |             |             |       |       |             |      |     |      |              |       |                 |
| BOG P.     | 780523      | Int         |       |       | 1.4         | 95   | 69  | 27   | 16           | 14.4  | 12 15           |
|            | 780712      | Int         |       |       | .2          | ID   | 73  | ID   | ID           | ND    | ID ID           |
|            | 780810      | Surf        |       |       | .2          | 85   | 75  | 10   | 6            | 14.9  | 12 18           |
|            | 780810      | Bot         |       |       | 3.6         | 256  | 104 | 152  | 42           | 14.1  | 20 -43          |
|            | 790823      | Surf        | 32    | 2     | .2          | 75   | 67  | 8    | 6            | 12.9  | 10 21           |
|            | 790823~     | LA          | 33    | 1     | .2          | 95   | 107 | -12  | -6           | 11.9  | 13 -11          |
|            | 790823      | Int         | 34    | 1     | 3.6         | 103  | 103 | 0    | 0            | 14.9  | 13 9            |
| <hr/>      |             |             |       |       |             |      |     |      |              |       |                 |
| CAT MT. P. | 790709      | Int         |       |       | 1.8         | ID   | 170 | ID   | ID           | ND    | ID ID           |
|            | 780819      | Surf        |       |       | .3          | 135  | 142 | -7   | -2           | 22.4  | 22 1            |
|            | 780819      | Bot         |       |       | 2.6         | 184  | 151 | 33   | 10           | 21.8  | 23 -6           |
|            | 790817      | Surf        | 126   | 8     | .3          | 141  | 148 | -7   | -3           | 24.3  | 22 10           |
|            | 790817      | LA          | 128   | 8     | 2.6         | 141  | 127 | 14   | 5            | 21.0  | 20 3            |
|            | 790817      | Int         | 130   | 8     | 1.8         | 141  | 133 | 8    | 3            | 23.3  | 21 11           |
| <hr/>      |             |             |       |       |             |      |     |      |              |       |                 |
| CLEAR P.   | 780512      | Int         |       |       | 3.2         | 316  | 309 | 7    | 1            | 36.9  | 38 -4           |
|            | 780620      | Int         |       |       | 2.9         | 299  | 299 | 0    | 0            | 35.8  | 36 -1           |
|            | 780809      | Surf        |       |       | 2.4         | 304  | 294 | 10   | 2            | 43.6  | 36 17           |
|            | 780809      | Bot         |       |       | 3.1         | 515  | 350 | 166  | 19           | 34.3  | 45 -30          |
|            | 790807      | Surf        | 7     | 0     | 2.4         | 292  | 273 | 19   | 3            | 30.0  | 35 -15          |
|            | 790807      | LA          | 7     | 0     | 3.1         | 299  | 270 | 29   | 5            | 34.2  | 35 -2           |
|            | 790807      | Int         | 6     | 0     | 2.9         | 307  | 290 | 17   | 3            | 35.2  | 36 -2           |

|                       |        |      | 2     |       | 3           |      |     |      | 4            |       |       |      |
|-----------------------|--------|------|-------|-------|-------------|------|-----|------|--------------|-------|-------|------|
|                       |        |      | Total | Max.  | Ion Balance |      |     |      | Conductivity |       |       |      |
| Sample                | Sample |      | Al    | Al    | Si          | Sum  | Sum | Cat. | Pct.         |       | Pct.  |      |
| Lake name             | date   | type | ug/L  | ueq/L | ug/L        | cat. | an. | -an. | err.         | Meas. | Calc. | err. |
| <hr/>                 |        |      |       |       |             |      |     |      |              |       |       |      |
| COPPERAS P.<br>(F.C.) | 780515 | Int  |       |       | 3.8         | 538  | ID  | ID   | ID           | 43.1  | ID    | ID   |
|                       | 780608 | Int  |       |       | 3.8         | 502  | 485 | 18   | 2            | 48.5  | 54    | -10  |
|                       | 780805 | Surf |       |       | 4.8         | 581  | 499 | 82   | 8            | 46.9  | 59    | -26  |
|                       | 780805 | Bot  |       |       | 3.5         | 1119 | 481 | 637  | 40           | 48.6  | 64    | -31  |
|                       | 790827 | Surf |       |       | 5.0         | 462  | 462 | 0    | 0            | 31.3  | 51    | -62  |
|                       | 790827 | LA   |       |       | 4.0         | 469  | 469 | 0    | 0            | 44.6  | 51    | -14  |
|                       | 790827 | Int  |       |       | 4.0         | 477  | 477 | 0    | 0            | 52.7  | 52    | 2    |
| COPPERAS P.<br>(W.N.) | 780511 | Int  |       |       | 2.7         | 389  | 344 | 45   | 6            | 33.9  | 44    | -29  |
|                       | 780614 | Int  |       |       | 1.5         | 340  | 302 | 38   | 6            | 35.8  | 38    | -7   |
|                       | 780808 | Surf |       |       | 1.1         | 333  | 333 | 0    | 0            | 34.4  | 39    | -14  |
|                       | 780808 | Bot  |       |       | 4.1         | ID   | ID  | ID   | ID           | 35.9  | ID    | ID   |
|                       | 790805 | Surf | 6     | 0     | 1.1         | 296  | 296 | 0    | 0            | 32.5  | 36    | -10  |
|                       | 790579 | LA   | 7     | 0     | 4.1         | 313  | 313 | 0    | 0            | 33.4  | 37    | -10  |
|                       | 790805 | Int  |       |       | 1.5         | 314  | 314 | 0    | 0            | 33.7  | 37    | -10  |
| COWHORN P.            | 780525 | Int  |       |       | 3.4         | 155  | 151 | 4    | 1            | ND    | ID    | ID   |
|                       | 780709 | Int  |       |       | 2.1         | 171  | 155 | 17   | 5            | ND    | 22    |      |
|                       | 780819 | Surf |       |       | .6          | 169  | 150 | 19   | 6            | 23.1  | 21    | 10   |
|                       | 780819 | Bot  |       |       | 5.3         | 263  | 121 | 142  | 37           | 23.1  | 22    | 7    |
|                       | 790817 | Surf | 11    | 1     | .6          | 179  | 172 | 7    | 2            | 21.9  | 23    | -4   |
|                       | 790817 | LA   | 53    | 0     | 5.3         | 186  | 186 | 0    | 0            | 21.8  | 24    | -11  |
|                       | 790817 | Int  | 119   | 0     | 2.1         | 215  | 215 | 0    | 0            | 30.7  | 26    | 14   |

| Lake name    | Sample date | Sample type | 2          |             | 3           |             |            |              | 4            |       |       |              |
|--------------|-------------|-------------|------------|-------------|-------------|-------------|------------|--------------|--------------|-------|-------|--------------|
|              |             |             | Total      | Max.        | Ion Balance |             |            |              | Conductivity |       |       |              |
|              |             |             | Al<br>ug/L | Al<br>ueq/L | Si<br>ug/L  | Sum<br>cat. | Sum<br>an. | Cat.<br>-an. | Pct.<br>err. | Meas. | Calc. | Pct.<br>err. |
| CRANE MT. P. | 780518      | Int         |            |             | 2.8         | 216         | 216        | 0            | 0            | 24.1  | 28    | -16          |
|              | 780616      | Int         |            |             | 2.5         | 195         | 195        | 0            | 0            | 25.9  | 25    | 2            |
|              | 780801      | Surf        |            |             | 1.6         | ID          | ID         | ID           | ID           | ND    | ID    | ID           |
|              | 780801      | Bot         |            |             | 1.6         | 276         | 253        | 24           | 5            | 25.4  | 29    | -14          |
|              | 790816      | Surf        | 8          | 0           | 1.6         | 190         | 193        | -3           | -1           | 23.0  | 25    | -10          |
|              | 790816      | LA          | 56         | 0           | 1.6         | 208         | 194        | 15           | 4            | 24.2  | 26    | -9           |
|              | 790816      | Int         | 68         | 0           | 2.6         | 195         | 200        | -5           | -1           | 30.1  | 26    | 14           |
| DEEP L.      | 780527      | Int         |            |             | 2.5         | 123         | 185        | -62          | -20          | ND    | ID    | ID           |
|              | 780628      | Int         |            |             | 1.8         | 113         | 181        | -68          | -23          | 26.4  | 27    | -1           |
|              | 780807      | Surf        |            |             | 1.4         | ID          | ID         | ID           | ID           | ND    | ID    | ID           |
|              | 780807      | Bot         |            |             | 2.7         | ID          | ID         | ID           | ID           | 27.3  | ID    | ID           |
|              | 790901      | Surf        | 667        | 58          | 1.4         | 203         | 162        | 41           | 11           | 25.4  | 28    | -9           |
|              | 790901      | LA          | 611        | 53          | 2.7         | 195         | 169        | 26           | 7            | 27.9  | 28    | 0            |
|              | 790901      | Int         | 758        | 65          | 1.7         | 213         | 176        | 37           | 9            | 28.8  | 29    | 0            |
| DEER L.      | 780530      | Int         |            |             | 5.1         | ID          | ID         | ID           | ID           | 28.1  | ID    | ID           |
|              | 780606      | Int         |            |             | 4.2         | ID          | ID         | ID           | ID           | 28.5  | ID    | ID           |
|              | 780813      | Surf        |            |             | 3.6         | ID          | ID         | ID           | ID           | 30.6  | ID    | ID           |
|              | 780813      | Bot         |            |             | 3.7         | ID          | ID         | ID           | ID           | 31.2  | ID    | ID           |
|              | 790825      | Surf        | 34         | 0           | 3.6         | 270         | 255        | 15           | 3            | 27.5  | 32    | -16          |
|              | 790825      | LA          | 28         | 0           | 3.7         | 271         | 252        | 19           | 4            | 28.1  | 32    | -13          |
|              | 790825      | Int         | 29         | 0           | 4.2         | 271         | 259        | 12           | 2            | 31.6  | 32    | -2           |

| Lake name        | Sample date | Sample type | 2     |      |      | 3           |      |              |      | 4     |       |      |
|------------------|-------------|-------------|-------|------|------|-------------|------|--------------|------|-------|-------|------|
|                  |             |             | Total | Max. | Si   | Ion Balance |      | Conductivity |      |       |       |      |
|                  |             |             | Al    | Al   |      | Sum         | Sum  | Cat.         | Pct. | Meas. | Calc. | Pct. |
| ug/L             | ueq/L       | ug/L        | cat.  | an.  | -an. | err.        | err. |              |      |       |       |      |
| DUNK P.          | 780517      | Int         |       |      | 6.7  | ID          | ID   | ID           | ID   | 41.4  |       | ID   |
|                  | 780622      | Int         |       |      | 5.1  | 443         | 425  | 17           | 2    | 46.1  | 51    | -11  |
|                  | 780811      | Surf        |       |      | 4.2  | ID          | ID   | ID           | ID   | 46.9  |       | ID   |
|                  | 780811      | Bot         |       |      | 8.4  | ID          | ID   | ID           | ID   | 45.3  | ID    | ID   |
|                  | 790828      | Surf        | 34    | 0    | 4.2  | 461         | 427  | 34           | 4    | 46.4  | 51    | -11  |
|                  | 790828      | LA          | 38    | 0    | 8.4  | 476         | 475  | 1            | 0    | 46.3  | 54    | -17  |
|                  | 790828      | Int         | 45    | 0    | 5.1  | 549         | 514  | 35           | 3    | 56.4  | 60    | -6   |
| EAST COPPERAS P. | 780515      | Int         |       |      | 1.3  | 108         | 110  | -2           | -1   | 21.5  | 18    | 14   |
|                  | 780608      | Int         |       |      | .2   | 92          | 114  | -22          | -11  | 24.5  | 17    | 31   |
|                  | 780805      | Surf        |       |      | 0    | 101         | 159  | -58          | -22  | 31.9  | 28    | 12   |
|                  | 780805      | Bot         |       |      | 3.1  | 113         | 103  | 10           | 5    | 21.4  | 24    | -13  |
|                  | 790827      | Surf        | 49    | 5    | 0    | 113         | 80   | 33           | 17   | 20.7  | 22    | -9   |
|                  | 790827      | LA          | 54    | 5    | 3.1  | 108         | 94   | 14           | 7    | 21.6  | 20    | 6    |
|                  | 790827      | Int         | 55    | 5    | .2   | 112         | 89   | 23           | 12   | 26.4  | 24    | 8    |
| FRANK P.         | 780622      | Int         |       |      | 2.5  | 188         | 205  | -17          | -4   | 26.5  | 25    | 4    |
|                  | 780811      | Surf        |       |      | 1.9  | 190         | 164  | 26           | 7    | 24.4  | 23    | 7    |
|                  | 780811      | Bot         |       |      | 2.3  | 231         | 162  | 69           | 17   | 24.1  | 22    | 9    |
|                  | 790828      | Surf        | 26    | 0    | 1.9  | 183         | 152  | 31           | 9    | 24.3  | 22    | 11   |
|                  | 790828      | LA          | 33    | 0    | 2.3  | 187         | 168  | 20           | 6    | 23.0  | 23    | 1    |
|                  | 790828      | Int         | 49    | 0    | 2.5  | 194         | 170  | 25           | 7    | 23.7  | 23    | 2    |

| Lake name          | Sample date | Sample type | 2          |             | 3           |             |            |              | 4            |       |       |              |
|--------------------|-------------|-------------|------------|-------------|-------------|-------------|------------|--------------|--------------|-------|-------|--------------|
|                    |             |             | Total      | Max.        | Ion Balance |             |            |              | Conductivity |       |       |              |
|                    |             |             | Al<br>ug/L | Al<br>ueq/L | Si<br>ug/L  | Sum<br>cat. | Sum<br>an. | Cat.<br>-an. | Pct.<br>err. | Meas. | Calc. | Pct.<br>err. |
| GIANTS<br>WASHBOWL | 780510      | Int         |            |             | 5.7         | 308         | 308        |              |              | 34.7  | 37    | -8           |
|                    | 780606      | Int         |            |             | 4.2         | 342         | 342        | 0            | 0            | 37.8  | 42    | -10          |
|                    | 780808      | Surf        |            |             | .5          | 316         | 316        | 0            | 0            | 35.1  | 38    | -9           |
|                    | 780808      | Bot         |            |             | 5.4         | 680         | 389        | 290          | 20           | 39.3  | 51    | -29          |
|                    | 790804      | Surf        | 57         | 0           | .5          | 306         | 297        | 9            | 2            | 30.3  | 36    | -19          |
|                    | 790804      | LA          | 57         | 0           | 5.4         | 251         | 251        | 0            | 0            | 34.4  | 30    | 11           |
|                    | 790804      | Int         | 60         | 0           | 4.2         | 366         | 347        | 19           | 3            | 37.5  | 42    | -11          |
| GREEN P.           | 780523      | Int         |            |             | .9          | 156         | 161        | -5           | -2           | 21.3  | 21    | 2            |
|                    | 780712      | Int         |            |             | .1          | 166         | 133        | 33           | 11           | ND    | 20    | ID           |
|                    | 780810      | Surf        |            |             | .2          | 166         | 154        | 12           | 4            | 20.9  | 22    | -4           |
|                    | 780810      | Bot         |            |             | 0           | 179         | 117        | 62           | 21           | 18.7  | 19    | -3           |
|                    | 790823      | Surf        | 13         | 1           | .2          | 150         | 131        | 18           | 6            | ND    | 19    | ID           |
|                    | 790823      | LA          | 16         | 1           | 0           | 150         | 138        | 12           | 4            | 18.6  | 19    | -2           |
|                    | 790823      | Int         | 15         | 1           | .1          | 150         | 144        | 7            | 2            | 19.6  | 20    | 0            |
| GULL P.            | 780512      | Int         |            |             | 2.2         | 333         | 326        | 7            | 1            | 37.7  | 38    | -1           |
|                    | 780620      | Int         |            |             | .9          | 301         | 254        | 47           | 9            | ND    | 33    | ID           |
|                    | 780809      | Surf        |            |             | .4          | 307         | 274        | 33           | 6            | ND    | 35    | ID           |
|                    | 780809      | Bot         |            |             | 3.5         | ID          | 336        | ID           | ID           | 38.8  | ID    | ID           |
|                    | 790807      | Surf        | 7          | 0           | .4          | 299         | 283        | 16           | 3            | 33.5  | 35    | -3           |
|                    | 790807      | LA          | 23         | 0           | 3.5         | 354         | 327        | 27           | 4            | 38.5  | 40    | -3           |
|                    | 790807      | Int         | 32         | 0           | .1          | 379         | 379        | 0            | 0            | 39.1  | 44    | -12          |

|             |             |             | 2       |          | 3           |          |         |           | 4            |       |       |           |
|-------------|-------------|-------------|---------|----------|-------------|----------|---------|-----------|--------------|-------|-------|-----------|
|             |             |             | Total   | Max.     | Ion Balance |          |         |           | Conductivity |       |       |           |
| Sample Lake | Sample date | Sample type | Al ug/L | Al ueq/L | Si ug/L     | Sum cat. | Sum an. | Cat. -an. | Pct. err.    | Meas. | Calc. | Pct. err. |
| <hr/>       |             |             |         |          |             |          |         |           |              |       |       |           |
| HEART L.    | 780514      | Int         |         |          | 2.2         | ID       | ID      | ID        | ID           | 23.1  |       | ID        |
|             | 780604      | Int         |         |          | 2.0         | 176      | 197     | -21       | -6           | 21.5  | 24    | -12       |
|             | 780816      | Surf        |         |          | 1.5         | 173      | 173     | 0         | 0            | 19.9  | 22    | -12       |
|             | 780816      | Bot         |         |          | 2.9         | 278      | 173     | 105       | 23           | 22.7  | 21    | 8         |
|             | 790811      | Surf        | 36      | 0        | 1.6         | 166      | 152     | 14        | 4            | 20.9  | 21    | 1         |
|             | 790811      | LA          | 44      | 0        | 2.9         | 170      | 159     | 11        | 3            | 20.2  | 21    | -5        |
|             | 790811      | Int         | 61      | 0        | 2.0         | 191      | 191     | 0         | 0            | 22.1  | 24    | -8        |
| HUNTLEY P.  | 780517      | Int         |         |          | 8.1         | 558      | 558     | 0         | 0            | 59.2  | 63    | -7        |
|             | 780812      | Surf        |         |          | 5.6         | 582      | 582     | 0         | 0            | 60.0  | 65    | -8        |
|             | 780812      | Bot         |         |          | 0.7         | 1288     | 606     | 681       | 36           | 65.3  | 73    | -12       |
|             | 790828      | Surf        | 50      | 0        | 5.6         | 574      | 574     | 0         | 0            | 57.9  | 64    | -11       |
|             | 790828      | LA          | 47      | 0        | 0.7         | 612      | 612     | 0         | 0            | 58.0  | 68    | -17       |
|             | 790828      | Int         | 47      | 0        | 5.6         | 623      | 623     | 0         | 0            | 64.9  | 69    | -7        |
| JENKINS P.  | 780601      | Int         |         |          | 5.2         | 237      | 188     | 49        | 12           | ND    | ID    | ID        |
|             | 780731      | Int         |         |          | 2.8         | 225      | 183     | 43        | 10           | 29.2  | 27    | 8         |
|             | 780731      | Surf        |         |          | 4.7         | 219      | 219     | 0         | 0            | 27.8  | 28    | -3        |
|             | 790830      | Surf        | 14      | 0        | ND          | 217      | 180     | 37        | 9            | 29.1  | 26    | 9         |
|             | 790830      | LA          | 30      | 0        | ND          | 217      | 199     | 18        | 4            | ND    | 27    | 0         |
|             | 790830      | Int         | 38      | 0        | 2.8         | 218      | 204     | 14        | 3            | 28.8  | 28    | 4         |

|                |             |             | 2          |             |      | 3<br>Ion Balance |     |      |      | Conducti |    |
|----------------|-------------|-------------|------------|-------------|------|------------------|-----|------|------|----------|----|
|                |             |             | Total      | Max.        | Si   | Sum              | Sum | Cat. | Pct. |          |    |
| Lake name      | Sample date | Sample type | Al<br>ug/L | Al<br>ueq/L | ug/L | cat.             | an. | -an. | err. | Meas.    |    |
| L. ARNOLD      | 790802      | Surf        | 462        | 35          | ND   | 167              | 139 | 29   | 9    | 19.7     | 23 |
|                | 790802      | LA          | 470        | 35          | ND   | 168              | 133 | 35   | 12   | ND       | 22 |
|                | 790802      | Int         | 479        | 38          | ND   | 173              | 130 | 43   | 14   | 21.1     | 22 |
| L. COLDEN      | 780623      | Int         |            |             | 3.9  | 131              | 191 | -60  | -19  | 21.3     | 25 |
|                | 780817      | Surf        |            |             | 4.6  | 163              | 151 | 13   | 4    | ND       | 25 |
|                | 780817      | Bot         |            |             | 3.8  | 163              | 157 | 6    | 2    | 25.0     | 25 |
| L. TEAR        | 790802      | Surf        | 673        | 58          | ND   | 209              | 166 | 43   | 11   | 19.0     | 30 |
| OF THE CLOUDS  | 790802      | LA          | 673        | 58          | ND   | 209              | 166 | 43   | 11   | ND       | 30 |
|                | 790802      | Int         | 673        | 58          | ND   | 203              | 166 | 37   | 10   | 28.4     | 28 |
| LITTLE PINE P. | 780804      | Bot         |            |             | ND   | ID               | ID  | ID   | ID   | 69.6     | ID |
|                | 790806      | Surf        | 6          | 0           | ND   | 600              | 600 | 0    | 0    | 51.6     | 67 |
|                | 790806      | LA          | 5          | 0           | ND   | 607              | 607 | 0    | 0    | 64.5     | 68 |
|                | 790806      | Int         | 5          | 0           | ND   | 607              | 607 | 0    | 0    | 58.6     | 68 |



|                      |             |             | 2     |       | 3           |      |     |      | Conducti |         |
|----------------------|-------------|-------------|-------|-------|-------------|------|-----|------|----------|---------|
|                      |             |             | Total | Max.  | Ion Balance |      |     |      |          |         |
|                      |             |             | Al    | Al    | Si          | Sum  | Sum | Cat. | Pct.     |         |
| Lake name            | Sample date | Sample type | ug/L  | ueq/L | ug/L        | cat. | an. | -an. | err.     | Meas.   |
| LITTLE<br>SHALLOW P. | 780526      | Int         |       |       | 9.6         | 348  | 348 | 0    | 0        | ND ID   |
|                      | 780710      | Int         |       |       | 9.4         | ID   | ID  | ID   | ID       | ND ID   |
|                      | 780820      | Surf        |       |       | 9.5         | 392  | 370 | 22   | 3        | 43.9 46 |
|                      | 780820      | Bot         |       |       | 0.1         | 572  | 380 | 192  | 20       | 42.9 45 |
|                      | 7905820     | Surf        |       |       | 9.5         | 371  | 359 | 12   | 2        | 36.4 43 |
|                      | 790820      | LA          | 18    | 0     | 9.4         | 369  | 369 | 0    | 0        | 40.8 45 |
|                      | 790820      | Int         | 18    | 0     | 0.1         | 369  | 369 | 0    | 0        | 49.8 45 |
| LIVINGSTON P.        | 780624      | Int         |       |       | 5.4         | 171  | 173 | -2   | -1       | 23.7 24 |
|                      | 780817      | Surf        |       |       | 5.0         | 150  | 179 | -30  | -9       | 22.1 23 |
|                      | 780817      | Bot         |       |       | 5.3         | 221  | 178 | 43   | 11       | 24.3 25 |
|                      | 790809      | Surf        | 128   | 5     | 5.0         | 179  | 162 | 17   | 5        | 25.4 23 |
|                      | 790809      | LA          | 141   | 6     | 5.3         | 177  | 157 | 20   | 6        | 23.8 22 |
|                      | 790809      | Int         | 227   | 9     | 5.4         | 189  | 176 | 13   | 4        | 24.1 24 |
| LONG P.              | 780601      | Int         |       |       | 5.2         | 195  | 202 | -7   | -2       | 30.6 28 |
|                      | 780731      | Surf        |       |       | 3.8         | 205  | 190 | 15   | 4        | 26.4 27 |
|                      | 780731      | Bot         |       |       | 2.5         | ID   | ID  | ID   | ID       | ND 26   |
|                      | 790830      | Surf        | 58    | 2     | 3.8         | 209  | 203 | 6    | 1        | 29.1 27 |
|                      | 790830      | LA          | 58    | 2     | 2.5         | 214  | 210 | 5    | 1        | 29.0 28 |
|                      | 790830      | Int         | 58    | 2     | 5.2         | 213  | 189 | 24   | 6        | 27.0 26 |

| Lake name   | Sample date | Sample type | 2        |         |      | 3           |         |           |           | 4            |       |           |
|-------------|-------------|-------------|----------|---------|------|-------------|---------|-----------|-----------|--------------|-------|-----------|
|             |             |             | Total Al | Max. Al | Si   | Ion Balance |         |           |           | Conductivity |       |           |
|             |             |             | ug/L     | ueq/L   | ug/L | Sum cat.    | Sum an. | Cat. -an. | Pct. err. | Meas.        | Calc. | Pct. err. |
| MOUNTAIN P. | 780521      | Int         |          |         | .4   | 74          | 64      | 10        | 7         | 14.7         | 12    | 16        |
|             | 780613      | Int         |          |         | .2   | 74          | 74      | -1        | 0         | 14.3         | 13    | 6         |
|             | 780818      | Surf        |          |         | .3   | 92          | 92      | -1        | 0         | 14.0         | 20    | -41       |
|             | 780818      | Bot         |          |         | .8   | 83          | 29      | 54        | 48        | 14.0         | 12    | 18        |
|             | 790822      | Surf        | 15       | 1       | .3   | 81          | 53      | 28        | 21        | 13.9         | 15    | -11       |
|             | 790822      | LA          | 13       | 1       | .8   | 69          | 53      | 16        | 13        | 13.2         | 14    | -5        |
|             | 790822      | Int         | 15       | 1       | .2   | 69          | 45      | 24        | 21        | 12.6         | 10    | 19        |
| NICK'S P.   | 780531      | Int         |          |         | 2.1  | 127         | 117     | 11        | 4         | 24.1         | 18    | 24        |
|             | 780708      | Int         |          |         | .8   | 129         | 123     | 6         | 2         | 19.2         | 18    | 5         |
|             | 780814      | Surf        |          |         | .3   | 139         | 122     | 17        | 6         | 19.7         | 20    | -2        |
|             | 780814      | Bot         |          |         | .3   | 147         | 145     | 2         | 1         | 20.4         | 21    | -1        |
|             | 790822      | Surf        | 59       | 3       | .3   | 130         | 115     | 14        | 6         | 21.5         | 17    | 20        |
|             | 790822      | LA          | 60       | 3       | .3   | 131         | 120     | 11        | 4         | 19.2         | 18    | 7         |
|             | 790822      | Int         | 63       | 3       | .8   | 130         | 115     | 15        | 6         | 18.6         | 17    | 7         |
| PARCH P.    | 780627      | Int         |          |         | 1.4  | 185         | 185     |           |           | 21.2         | 22    | -5        |
|             | 780806      | Surf        |          |         | 1.0  | 205         | 193     | 13        | 3         | ND           | 24    | ID        |
|             | 780806      | Bot         |          |         | 2.6  | 314         | 165     | 148       | 31        | 21.6         | 24    | -10       |
|             | 790808      | Surf        | 18       | 0       | .1   | 194         | 190     | 4         | 1         | 18.5         | 24    | -27       |
|             | 790808      | LA          | 13       | 0       | 2.6  | 200         | 200     | 0         | 0         | 22.6         | 24    | -5        |
|             | 790808      | Int         | 26       | 0       | 1.4  | 220         | 179     | 41        | 10        | 24.2         | 24    | 1         |

| Lake name | Sample date | Sample type | 2          |             |            | 3           |            |              |              | 4            |       |              |
|-----------|-------------|-------------|------------|-------------|------------|-------------|------------|--------------|--------------|--------------|-------|--------------|
|           |             |             | Total      | Max.        | Si<br>ug/L | Ion Balance |            |              |              | Conductivity |       |              |
|           |             |             | Al<br>ug/L | Al<br>ueq/L |            | Sum<br>cat. | Sum<br>an. | Cat.<br>-an. | Pct.<br>err. | Meas.        | Calc. | Pct.<br>err. |
| PINE P.   | 780522      | Int         |            |             | 1.1        | 235         | 235        | 0            | 0            | 29.4         | 29    | 0            |
|           | 780617      | Int         |            |             | .7         | 235         | 230        | 5            | 1            | 32.1         | 29    | 9            |
|           | 780804      | Surf        |            |             | .3         | 234         | 218        | 16           | 4            | ND           | 28    | ID           |
|           | 780804      | Bot         |            |             | 1.1        | 350         | 228        | 122          | 21           | 28.1         | 30    | -7           |
|           | 790806      | Surf        | 27         | 0           | .3         | 233         | 233        | 0            | 0            | 24.2         | 29    | -18          |
|           | 790608      | LA          | 21         | 0           | 1.1        | 233         | 233        | 0            | 0            | 27.6         | 29    | -6           |
|           | 790806      | Int         | 21         | 0           | .7         | 234         | 208        | 26           | 6            | 25.0         | 27    | -8           |
| ROCK P.   | 780511      | Int         |            |             | 6.7        | 284         | 284        | 0            | 0            | 43.6         | 36    | 18           |
|           | 780614      | Int         |            |             | 5.8        | 327         | 267        | 59           | 10           | 35.8         | 38    | -6           |
|           | 780803      | Surf        |            |             | 5.3        | 349         | 250        | 99           | 17           | 37.4         | 37    | 0            |
|           | 780803      | Bot         |            |             | 7.8        | 371         | 265        | 106          | 17           | 35.5         | 37    | -4           |
|           | 790805      | Surf        | 29         | 0           | 5.3        | 299         | 275        | 24           | 4            | 30.3         | 36    | -20          |
|           | 790805      | LA          | 43         | 0           | 7.8        | 307         | 307        | 0            | 0            | 35.7         | 38    | -7           |
|           | 790805      | Int         | 59         | 0           | 5.8        | 319         | 315        | 4            | 1            | 34.6         | 39    | -13          |
| ROUND P.  | 780510      | Int         |            |             | 5.3        | 175         | 167        | 8            | 2            | 21.5         | 21    | 1            |
|           | 780606      | Int         |            |             | 5.2        | 187         | 187        | 0            | 0            | 29.1         | 23    | 20           |
|           | 780816      | Surf        |            |             | 4.3        | 180         | 180        | 0            | 0            | 23.0         | 23    | 1            |
|           | 780816      | Bot         |            |             | 5.9        | 336         | 199        | 138          | 26           | 24.4         | 26    | -7           |
|           | 790813      | Surf        | 25         | 0           | 4.3        | 187         | 186        | 1            | 0            | 21.1         | 23    | -10          |
|           | 790813      | LA          | 31         | 0           | 5.5        | 191         | 183        | 8            | 2            | 21.3         | 23    | -6           |
|           | 790813      | Int         | 42         | 0           | 5.2        | 200         | 190        | 10           | 3            | 23.1         | 23    | 0            |

|                   |             |             | 2     |       |      | 3           |     |      |      | 4            |       |      |
|-------------------|-------------|-------------|-------|-------|------|-------------|-----|------|------|--------------|-------|------|
|                   |             |             | Total | Max.  | Si   | Ion Balance |     |      |      | Conductivity |       |      |
|                   |             |             | Al    | Al    | ug/L | Sum         | Sum | Cat. | Pct. |              | Pct.  |      |
| Lake name         | Sample date | Sample type | ug/L  | ueq/L | ug/L | cat.        | an. | -an. | err. | Meas.        | Calc. | err. |
| UPPER WALLFACE P. | 780610      | Int         |       |       | 2.8  | 111         | 180 | -69  | -24  | 22.8         | 23    | -2   |
|                   | 780815      | Surf        |       |       | 2.0  | 100         | 124 | -23  | -10  | 18.5         | 19    | -2   |
|                   | 780815      | Bot         |       |       | 2.6  | 107         | 114 | -6   | -3   | 21.3         | 19    | 9    |
|                   | 790812      | Surf        | 192   | 13    | 2.0  | 120         | 113 | 7    | 3    | 19.8         | 18    | 9    |
|                   | 790812      | LA          | 250   | 17    | 2.6  | 132         | 114 | 18   | 7    | 19.6         | 19    | 4    |
|                   | 790812      | Int         | 409   | 28    | 2.8  | 138         | 115 | 23   | 9    | 19.9         | 19    | 7    |
| WASHBOWL P.       | 780526      | Int         |       |       | .2   | 107         | 77  | 30   | 16   | ND           | ND    |      |
|                   | 780710      | Int         |       |       | .7   | ID          | ID  | ID   | ID   | ND           | ID    | ID   |
|                   | 780820      | Surf        |       |       | .7   | 126         | 105 | 21   | 9    | 25.9         | 29    | -11  |
|                   | 780820      | Bot         |       |       | 1.3  | 128         | 161 | -32  | -15  | 31.1         | 31    | 0    |
|                   | 790820      | Surf        | 38    | 4     | .7   | 108         | 89  | 19   | 10   | 23.3         | 21    | 8    |
|                   | 790820      | LA          | 38    | 4     | .7   | 110         | 90  | 20   | 10   | 23.5         | 22    | 5    |
|                   | 790820      | Int         | 38    | 4     | .7   | 110         | 90  | 20   | 10   | 23.1         | 22    | 5    |
| WOLF L.           | 780530      | Int         |       |       | 5.1  | 234         | ID  | ID   | ID   | 29.1         | ID    | ID   |
|                   | 780629      | Int         |       |       | 4.9  | 248         | 244 | 4    | 1    | 29.0         | 31    | -8   |
|                   | 780813      | Surf        |       |       | 4.6  | 260         | 247 | 13   | 3    | 30.6         | 32    | -4   |
|                   | 780813      | Bot         |       |       | 5.1  | 333         | 214 | 118  | 22   | 30.7         | 30    | 4    |
|                   | 790825      | Surf        | 14    | 0     | 4.6  | 257         | 233 | 24   | 5    | 30.4         | 31    | 0    |
|                   | 790825      | LA          | 19    | 0     | 5.1  | 257         | 228 | 29   | 6    | 29.1         | 30    | -4   |
|                   | 790825      | Int         | 27    | 0     | 4.9  | 258         | 256 | 2    | 0    | 31.8         | 31    | 2    |

Footnotes for Table 9

1. Ion balance and conductivity checks were made to assess the overall accuracy of measurements of ions. Differences between calculated and expected values are due primarily to measurement errors and lack of data on concentrations (eq/L) of Al and organic acids. Organic acids and Al can both contribute significantly to the charge balance. Problems due to their omission are greatest in acid lakes and highly colored lakes, respectively. Errors may also result from estimations of  $\text{HCO}_3^-$ . Major discrepancies in the bottom sample ionic balances probably result because some of the measured elements were in insoluble form, and because ionic forms of Fe and Mn, which can be in high concentrations in anoxic hypolimnia, were not measured. Problems are also caused in checking many of the lakes with developed watersheds. Many of these lakes contain high concentrations of Cl from road salt. There was difficulty in measuring such high concentrations, so there are some significant errors, especially in the conductivity check analyses of these lakes.

ND means no data; ID means insufficient data.

See Tables 5 and 6 for depth of integrated samples.

Surf = surface; LA = lake average; Int = integrated-water-column

2. Methods of calculating maximum possible concentrations (eq/L) of Al are described and discussed in the results section ("Cation-anion balance," p. 21) of the manuscript on the limnology of six lakes. Al was not included in the ion balance or the conductivity check analyses.
3. The ion balances were calculated by summing all measured cations and anions (Table 8) and then subtracting anions from cations. Organic acid and Al were not included. Percent error was determined

as the cation-anion difference divided by the sum of cations plus anions multiplied by 100.

4. The procedure used for conductivity check analysis is described in the results section of the manuscript ("Cation-anion balance," p. 21) on the limnology of six lakes.
