# Supplementary material
Source: publisher figshare collection journal article supplement (https://wiley.figshare.com/articles/dataset/_/3521588)
Supplement: Supplementary file 3 [file 1]

Table 7 . Total phosphorus, chlorophyll a, and pheopigment concentrations ( $\mu\text{g/L}$ ) in Adirondack study lakes.  
ND means no data.

| Lake         | Date<br>lake<br>sampled | Total phosphorus |        |                               | Chlorophyll <u>a</u> |        |                               | Pheopigments |        |                               |
|--------------|-------------------------|------------------|--------|-------------------------------|----------------------|--------|-------------------------------|--------------|--------|-------------------------------|
|              |                         | Lake<br>ave.     | Integ. | Twice<br>Secchi<br>disc depth | Lake<br>ave.         | Integ. | Twice<br>Secchi<br>disc depth | Lake<br>ave. | Integ. | Twice<br>Secchi<br>disc depth |
| Arbutus L.   | 5/30/78                 | 6.4              | 7.7    | 7.7                           | --                   | --     | --                            | --           | --     | --                            |
|              | 6/29/78                 | --               | --     | --                            | --                   | --     | 1.6                           | --           | --     | 0.4                           |
|              | 7/24/78                 | --               | --     | --                            | --                   | --     | 3.1                           | --           | --     | 0.8                           |
|              | 8/13/78                 | --               | --     | --                            | --                   | 3.2    | 3.2                           | --           | 1.8    | 1.8                           |
|              | 5/28/79                 | 8.4              | 8.2    | 8.2                           | 0.9                  | 0.6    | 0.6                           | 0.7          | 0.6    | 0.6                           |
|              | 6/20/79                 | 6.1              | 9.2    | 9.2                           | 1.5                  | 1.4    | 1.4                           | 0.6          | 0.6    | 0.5                           |
|              | 8/25/79                 | 7.9              | 9.1    | 9.1                           | 2.9                  | 3.7    | 3.7                           | 1.3          | 2.0    | 2.0                           |
| Avalanche L. | 6/23/78                 | 3.6              | 3.5    | 3.5                           | --                   | --     | 1.2                           | --           | --     | 0.8                           |
|              | 7/29/78                 | --               | --     | --                            | --                   | --     | 0.7                           | --           | --     | 0.2                           |
|              | 8/17/78                 | --               | --     | --                            | --                   | 1.6    | 1.6                           | --           | 0.6    | 0.6                           |
|              | 5/18/79                 | 5.7              | 5.8    | 5.8                           | 1.2                  | 1.3    | 1.3                           | 0.2          | 0.7    | 0.7                           |
|              | 6/19/79                 | 4.7              | 4.6    | 4.6                           | 1.1                  | 1.1    | 1.1                           | 0.4          | 0.4    | 0.4                           |
|              | 8/9/79                  | 3.7              | 3.7    | 3.7                           | 1.2                  | 1.2    | 1.2                           | 0.2          | 0.6    | 0.6                           |
| Bear P.      | 5/23/78                 | 2.9              | 2.7    | 2.7                           | --                   | --     | 1.1                           | --           | --     | 0.4                           |
|              | 7/12/78                 | --               | --     | --                            | --                   | --     | ND                            | --           | --     | ND                            |
|              | 8/10/78                 | --               | --     | --                            | --                   | ND     | 1.5                           | --           | ND     | 0.5                           |
|              | 5/25/79                 | 4.8              | 5.3    | 5.3                           | 0.6                  | 0.9    | 0.9                           | 0.1          | 0.1    | 0.1                           |
|              | 6/26/79                 | 2.6              | 3.8    | 3.8                           | 1.0                  | 1.2    | 1.2                           | 0.0          | 0.2    | 0.2                           |
|              | 8/23/79                 | 6.3              | 4.8    | 4.8                           | 1.7                  | 2.7    | 2.7                           | 1.6          | 1.0    | 1.0                           |

| Lake                | Date<br>lake<br>sampled | Total phosphorus |        |                               | Chlorophyll a |        |                               | Pheopigments |        |                               |
|---------------------|-------------------------|------------------|--------|-------------------------------|---------------|--------|-------------------------------|--------------|--------|-------------------------------|
|                     |                         | Lake<br>ave.     | Integ. | Twice<br>Secchi<br>disc depth | Lake<br>ave.  | Integ. | Twice<br>Secchi<br>disc depth | Lake<br>ave. | Integ. | Twice<br>Secchi<br>disc depth |
| Bog P.              | 5/23/78                 | 32.5             | 27.0   | 27.0                          | --            | --     | 40.1                          | --           | --     | 32.6                          |
|                     | 7/12/78                 | --               | --     | --                            | --            | --     | ND                            | --           | --     | ND                            |
|                     | 8/10/78                 | --               | --     | --                            | --            | 98.2   | 98.2                          | --           | 37.4   | 37.4                          |
|                     | 5/25/79                 | 29.4             | 30.1   | 30.1                          | 17.9          | 13.2   | 13.2                          | 9.4          | 14.6   | 14.6                          |
|                     | 6/26/79                 | 24.9             | 32.8   | 32.8                          | 15.9          | 27.8   | 27.8                          | 15.8         | 25.9   | 25.9                          |
|                     | 8/23/79                 | 35.4             | 38.4   | 38.4                          | 31.9          | 40.5   | 40.5                          | 9.1          | 12.7   | 12.7                          |
|                     |                         |                  |        |                               |               |        |                               |              |        |                               |
| Cat Mt. P.          | 7/9/78                  | 5.2              | 6.3    | 6.3                           | --            | --     | 0.8                           | --           | --     | 0.2                           |
|                     | 8/19/78                 | --               | --     | --                            | --            | 0.7    | 0.7                           | --           | 0.2    | 0.2                           |
|                     | 5/11/79                 | 5.6              | 5.8    | 5.8                           | 0.6           | 0.8    | 0.8                           | 0.4          | 0.2    | 0.2                           |
|                     | 6/11/79                 | 3.7              | 4.6    | 4.6                           | 1.6           | 2.1    | 2.1                           | 0.8          | 0.8    | 0.8                           |
|                     | 8/17/79                 | 6.4              | 5.2    | 5.2                           | 0.6           | 0.7    | 0.7                           | 0.2          | 0.2    | 0.2                           |
| Clear P.            | 5/12/78                 | 3.8              | 3.8    | 3.8                           | --            | --     | --                            | --           | --     | --                            |
|                     | 6/20/78                 | --               | --     | --                            | --            | --     | 3.3                           | --           | --     | 0.5                           |
|                     | 7/15/78                 | --               | --     | --                            | --            | --     | 3.0                           | --           | --     | 0.8                           |
|                     | 8/9/78                  | --               | --     | --                            | --            | ND     | 2.7                           | --           | ND     | 0.4                           |
|                     | 5/8/79                  | 4.3              | 5.2    | 5.2                           | 0.6           | 1.4    | 1.4                           | 0.3          | 0.6    | 0.6                           |
|                     | 6/9/79                  | 4.2              | 4.4    | 4.4                           | 1.8           | 3.0    | 3.0                           | 0.4          | 0.7    | 0.7                           |
|                     | 8/7/79                  | 4.3              | 5.3    | 5.3                           | 2.1           | 1.8    | 1.8                           | 0.3          | 0.1    | 0.1                           |
| Copperas P.<br>F.C. | 5/15/78                 | 13.8             | 17.3   | 17.3                          | --            | --     | --                            | --           | --     | --                            |
|                     | 6/8/78                  | --               | --     | --                            | --            | --     | 12.3                          | --           | --     | 2.6                           |
|                     | 7/14/78                 | --               | --     | --                            | --            | --     | 5.0                           | --           | --     | 0.9                           |
|                     | 8/5/78                  | --               | --     | --                            | --            | ND     | 4.7                           | --           | ND     | 1.1                           |
|                     | 5/21/79                 | 14.9             | 27.1   | 27.1                          | 5.4           | 13.1   | 13.1                          | 0.7          | 2.4    | 2.4                           |
|                     | 6/23/79                 | ND               | ND     | ND                            | 3.5           | 11.3   | 11.3                          | 0.7          | 9.6    | 9.6                           |
|                     | 8/27/79                 | 10.9             | 13.1   | 13.1                          | 4.3           | 6.6    | 6.6                           | 0.9          | 1.3    | 1.3                           |

| Lake              | Date<br>lake<br>sampled | Total phosphorus |        |                               | Chlorophyll a |        |                               | Pheopigments |        |                               |
|-------------------|-------------------------|------------------|--------|-------------------------------|---------------|--------|-------------------------------|--------------|--------|-------------------------------|
|                   |                         | Lake<br>ave.     | Integ. | Twice<br>Secchi<br>disc depth | Lake<br>ave.  | Integ. | Twice<br>Secchi<br>disc depth | Lake<br>ave. | Integ. | Twice<br>Secchi<br>disc depth |
| Copperas P.<br>WN | 5/11/78                 | 16.6             | 12.7   | 9.5                           | --            | --     | --                            | --           | --     | --                            |
|                   | 6/14/78                 | --               | --     | --                            | --            | --     | 3.3                           | --           | --     | 1.4                           |
|                   | 7/13/78                 | --               | --     | --                            | --            | --     | 3.3                           | --           | --     | 0.6                           |
|                   | 8/8/78                  | --               | --     | --                            | --            | ND     | 3.3                           | --           | ND     | 0.9                           |
|                   | 5/10/79                 | 18.9             | 21.2   | 18.6                          | 15.4          | 18.7   | 18.7                          | 2.5          | 2.2    | 2.2                           |
|                   | 6/6/79                  | 17.3             | 16.4   | 16.4                          | 3.7           | 7.9    | 7.9                           | 2.4          | 4.7    | 4.7                           |
|                   | 8/5/79                  | 19.8             | 19.9   | --                            | 4.1           | 4.2    | ND                            | 2.3          | 3.0    | ND                            |
| Cowhorn P.        | 5/25/78                 | 9.9              | 10.5   | 10.5                          | --            | --     | --                            | --           | --     | --                            |
|                   | 7/9/78                  | --               | --     | --                            | --            | --     | 4.3                           | --           | --     | 2.0                           |
|                   | 8/19/78                 | --               | --     | --                            | --            | ND     | 13.0                          | --           | ND     | 6.4                           |
|                   | 5/11/79                 | 13.2             | 15.6   | 11.1                          | 1.5           | 2.2    | 1.4                           | 1.5          | 3.1    | 1.6                           |
|                   | 6/11/79                 | 15.6             | 18.0   | 19.1                          | 6.6           | 7.2    | 6.8                           | 3.5          | 3.2    | 6.8                           |
|                   | 8/17/79                 | 16.9             | 23.6   | 15.6                          | 10.0          | 17.0   | 15.5                          | 8.8          | 17.1   | 8.5                           |
| Crane Mt. P.      | 5/18/78                 | 6.1              | 7.9    | 7.9                           | --            | --     | 1.1                           | --           | --     | 0.6                           |
|                   | 6/16/78                 | --               | --     | --                            | --            | --     | ND                            | --           | --     | ND                            |
|                   | 8/1/78                  | --               | --     | --                            | --            | 4.0    | 4.0                           | --           | 0.5    | 0.5                           |
|                   | 5/7/79                  | 5.1              | 4.8    | 4.8                           | 0.8           | 1.1    | 1.1                           | 0.2          | 0.0    | 0.0                           |
|                   | 6/12/79                 | 7.6              | 7.9    | 7.9                           | 0.7           | 1.1    | 1.1                           | 0.4          | 0.4    | 0.4                           |
|                   | 8/16/79                 | 7.4              | 6.4    | 6.4                           | 1.0           | 1.2    | 1.2                           | 0.2          | 0.2    | 0.2                           |
| Deep L.           | 5/27/78                 | 2.3              | 2.3    | 2.3                           | --            | --     | 1.6                           | --           | --     | 0.8                           |
|                   | 6/28/78                 | --               | --     | --                            | --            | --     | ND                            | --           | --     | ND                            |
|                   | 8/7/78                  | --               | --     | --                            | --            | ND     | 1.8                           | --           | ND     | 0.8                           |
|                   | 5/31/79                 | 4.3              | 3.6    | ND                            | 1.2           | 1.4    | 1.4                           | 0.4          | 0.1    | 0.1                           |
|                   | 6/24/79                 | ND               | ND     | ND                            | 1.2           | 1.6    | 1.6                           | 0.3          | 0.3    | 0.3                           |
|                   | 9/1/79                  | 2.7              | 3.2    | 3.2                           | 0.9           | 1.1    | 1.1                           | 0.1          | 0.3    | 0.3                           |

| Lake              | Date<br>lake<br>sampled | Total phosphorus |        |                               | Chlorophyll a |        |                               | Pheopigments |        |                               |
|-------------------|-------------------------|------------------|--------|-------------------------------|---------------|--------|-------------------------------|--------------|--------|-------------------------------|
|                   |                         | Lake<br>ave.     | Integ. | Twice<br>Secchi<br>disc depth | Lake<br>ave.  | Integ. | Twice<br>Secchi<br>disc depth | Lake<br>ave. | Integ. | Twice<br>Secchi<br>disc depth |
| Deer L.           | 5/30/78                 | 7.3              | 6.9    | 6.9                           | --            | --     | --                            | --           | --     | --                            |
|                   | 6/6/78                  | --               | --     | --                            | --            | --     | 3.0                           | --           | --     | 0.3                           |
|                   | 7/24/78                 | --               | --     | --                            | --            | --     | 5.6                           | --           | --     | 1.1                           |
|                   | 8/13/78                 | --               | --     | --                            | --            | 6.0    | 6.0                           | --           | 0.8    | 0.8                           |
|                   | 5/28/79                 | 11.9             | 13.4   | 13.4                          | 3.7           | 4.0    | 4.0                           | 0.4          | 0.5    | 0.5                           |
|                   | 6/20/79                 | 9.1              | 10.4   | 10.4                          | 2.2           | 2.3    | 2.3                           | 0.8          | 0.6    | 0.6                           |
|                   | 8/25/79                 | 12.3             | 11.6   | 11.6                          | 4.0           | 4.1    | 4.1                           | 1.3          | 1.2    | 1.2                           |
| Dunk P.           | 5/17/78                 | 11.1             | 10.6   | 10.6                          | --            | --     | --                            | --           | --     | --                            |
|                   | 6/22/78                 | --               | --     | --                            | --            | --     | 1.5                           | --           | --     | 0.5                           |
|                   | 7/26/78                 | --               | --     | --                            | --            | --     | 1.9                           | --           | --     | 0.7                           |
|                   | 8/11/78                 | --               | --     | --                            | --            | ND     | 1.9                           | --           | ND     | 0.7                           |
|                   | 5/31/79                 | 16.5             | 31.3   | ND                            | 0.6           | 0.5    | ND                            | 0.1          | 0.5    | ND                            |
|                   | 6/28/79                 | 13.6             | 30.4   | 16.8                          | 2.6           | 1.6    | ND                            | 0.3          | 0.6    | ND                            |
|                   | 8/28/79                 | 12.2             | 34.3   | ND                            | 2.1           | 2.9    | ND                            | 0.7          | 1.9    | ND                            |
| E. Cooperas<br>P. | 5/15/78                 | 45.0             | 48.6   | 48.6                          | --            | --     | --                            | --           | --     | --                            |
|                   | 6/8/78                  | --               | --     | --                            | --            | --     | 8.3                           | --           | --     | 11.8                          |
|                   | 7/14/78                 | --               | --     | --                            | --            | --     | 24.5                          | --           | --     | 18.8                          |
|                   | 8/5/78                  | --               | --     | --                            | --            | 38.5   | 38.5                          | --           | 36.5   | 36.5                          |
|                   | 5/21/79                 | 55.5             | 51.8   | 51.8                          | 31.4          | 8.9    | 8.9                           | 2.1          | 13.9   | 13.9                          |
|                   | 6/23/79                 | ND               | ND     | ND                            | 23.0          | 45.4   | 45.4                          | 21.7         | 18.5   | 18.5                          |
|                   | 8/27/79                 | 32.3             | 21.8   | 21.8                          | 10.7          | 16.0   | 16.0                          | 12.2         | 10.2   | 10.2                          |

| Lake        | Date<br>lake<br>sampled | Total phosphorus |        |                               | Chlorophyll a |        |                               | Pheopigments |        |                               |
|-------------|-------------------------|------------------|--------|-------------------------------|---------------|--------|-------------------------------|--------------|--------|-------------------------------|
|             |                         | Lake<br>ave.     | Integ. | Twice<br>Secchi<br>disc depth | Lake<br>ave.  | Integ. | Twice<br>Secchi<br>disc depth | Lake<br>ave. | Integ. | Twice<br>Secchi<br>disc depth |
| Frank P.    | 6/22/78                 | --               | --     | --                            | --            | --     | 0.8                           | --           | --     | 0.5                           |
|             | 7/26/78                 | --               | --     | --                            | --            | --     | 1.1                           | --           | --     | 0.6                           |
|             | 8/11/78                 | --               | --     | --                            | --            | 1.2    | 1.2                           | --           | 0.5    | 0.5                           |
|             | 5/31/79                 | 6.6              | 7.8    | 7.8                           | 1.0           | 1.0    | 1.0                           | 0.7          | 0.7    | 0.7                           |
|             | 6/28/79                 | 6.8              | 8.2    | 8.2                           | 0.9           | 1.0    | 1.0                           | 0.1          | 0.3    | 0.3                           |
|             | 8/28/79                 | 7.7              | 9.6    | 9.6                           | 0.8           | 1.8    | 1.8                           | 0.3          | 0.9    | 0.9                           |
| G. Washbowl | 5/10/78                 | 6.8              | 7.1    | 7.1                           | --            | --     | --                            | --           | --     | --                            |
|             | 6/6/78                  | --               | --     | --                            | --            | --     | 2.8                           | --           | --     | 0.7                           |
|             | 7/13/78                 | --               | --     | --                            | --            | --     | 2.1                           | --           | --     | 0.4                           |
|             | 8/8/78                  | --               | --     | --                            | --            | 3.5    | 3.5                           | --           | 1.1    | 1.1                           |
|             | 5/5/79                  | 8.9              | 9.2    | 9.2                           | 1.8           | 1.8    | 1.8                           | 0.2          | 0.4    | 0.4                           |
|             | 6/6/79                  | 8.5              | 9.7    | 9.7                           | 2.1           | 2.4    | 2.4                           | 1.0          | 1.1    | 1.1                           |
|             | 8/4/79                  | 11.2             | 12.5   | 12.5                          | 4.7           | 5.5    | 5.5                           | 1.2          | 1.6    | 1.6                           |
| Green P.    | 5/23/78                 | 10.2             | 11.1   | 11.1                          | --            | --     | 4.9                           | --           | --     | 0.8                           |
|             | 7/12/78                 | --               | --     | --                            | --            | --     | ND                            | --           | --     | ND                            |
|             | 8/10/78                 | --               | --     | --                            | --            | 2.7    | 2.7                           | --           | 0.9    | 0.9                           |
|             | 5/25/79                 | 11.0             | 12.5   | 12.5                          | 2.7           | 2.7    | 2.7                           | 0.6          | 1.0    | 1.0                           |
|             | 6/26/79                 | 6.8              | 9.9    | 9.9                           | 2.1           | 2.6    | 2.6                           | 0.3          | 0.4    | 0.4                           |
|             | 8/23/79                 | 6.9              | 7.1    | 7.1                           | 2.6           | 2.3    | 2.3                           | 0.5          | 0.5    | 0.5                           |
| Gull P.     | 5/12/78                 | 17.4             | 22.5   | 22.5                          | --            | --     | --                            | --           | --     | --                            |
|             | 6/20/78                 | --               | --     | --                            | --            | --     | 10.6                          | --           | --     | 2.5                           |
|             | 7/15/78                 | --               | --     | --                            | --            | --     | 11.3                          | --           | --     | 3.4                           |
|             | 8/9/78                  | --               | --     | --                            | --            | 13.8   | 12.8                          | --           | 3.8    | 3.1                           |
|             | 5/8/79                  | 11.5             | 15.5   | ND                            | 2.2           | 3.0    | 3.0                           | 0.8          | 3.1    | 3.1                           |
|             | 6/9/79                  | 12.9             | 19.1   | 15.1                          | 7.1           | 9.1    | 7.4                           | 1.9          | 3.6    | 1.6                           |
|             | 8/7/79                  | 17.4             | 26.9   | 20.5                          | 11.1          | 16.1   | 15.9                          | 2.7          | 4.8    | 3.1                           |

| Lake                     | Date<br>lake<br>sampled | Total phosphorus |        |                               | Chlorophyll a |        |                               | Pheopigments |        |                               |
|--------------------------|-------------------------|------------------|--------|-------------------------------|---------------|--------|-------------------------------|--------------|--------|-------------------------------|
|                          |                         | Lake<br>ave.     | Integ. | Twice<br>Secchi<br>disc depth | Lake<br>ave.  | Integ. | Twice<br>Secchi<br>disc depth | Lake<br>ave. | Integ. | Twice<br>Secchi<br>disc depth |
| L. Tear of<br>the Clouds | 5/22/79                 | 3.2              | 3.2    | 3.2                           | 0.1           | 0.1    | 0.1                           | 0.1          | 0.1    | 0.1                           |
|                          | 8/2/79                  | 3.8              | 3.3    | 3.3                           | 0.8           | 0.8    | 0.8                           | 0.8          | 0.8    | 0.8                           |
| Little Pine<br>P.        | 8/4/78                  | 12.8             | 12.8   | 12.8                          | --            | 4.1    | 4.1                           | --           | 0.6    | 0.6                           |
|                          | 5/9/79                  | 11.5             | 12.6   | 12.6                          | 3.2           | 1.5    | 1.5                           | 0.3          | 0.2    | 0.2                           |
|                          | 6/8/79                  | 12.6             | 13.9   | 13.9                          | 2.4           | 2.1    | 2.1                           | 0.3          | 0.2    | 0.2                           |
|                          | 8/6/79                  | 9.7              | 9.7    | 9.7                           | 0.8           | 0.8    | 0.8                           | 0.0          | 0.0    | 0.0                           |
| Little<br>Shallow<br>P.  | 5/26/78                 | 8.1              | 8.1    | 8.1                           | --            | --     | ND                            | --           | --     | ND                            |
|                          | 7/10/78                 | --               | --     | --                            | --            | --     | 1.3                           | --           | --     | 0.5                           |
|                          | 8/20/78                 | --               | --     | --                            | --            | 12.5   | 12.5                          | --           | 1.6    | 1.6                           |
|                          | 5/12/79                 | 11.0             | 13.0   | 13.0                          | 1.6           | 2.2    | 2.2                           | 0.9          | 0.7    | 0.7                           |
|                          | 6/13/79                 | 11.1             | 11.1   | 11.1                          | 3.7           | 2.9    | 2.9                           | 0.2          | 0.8    | 0.8                           |
|                          | 8/20/79                 | 9.8              | 9.8    | 9.8                           | 1.2           | 1.2    | 1.2                           | 0.3          | 0.3    | 0.3                           |
| Livingston<br>P.         | 6/24/78                 | 4.6              | 2.7    | 2.7                           | --            | --     | 0.9                           | --           | --     | 0.5                           |
|                          | 7/20/78                 | --               | --     | --                            | --            | --     | 0.4                           | --           | --     | 0.1                           |
|                          | 8/17/78                 | --               | --     | --                            | --            | 0.9    | 0.9                           | --           | 0.8    | 0.8                           |
|                          | 5/18/79                 | 4.3              | 4.4    | 4.4                           | 0.4           | 0.8    | 0.8                           | 0.1          | 0.1    | 0.1                           |
|                          | 6/19/79                 | 2.7              | 2.7    | 2.7                           | 0.3           | 0.5    | 0.5                           | 0.0          | 0.0    | 0.0                           |
|                          | 8/9/79                  | 2.1              | 3.8    | 3.8                           | 0.3           | 0.7    | 0.7                           | 0.2          | 0.2    | 0.2                           |
| Long P.                  | 6/1/78                  | 3.2              | 3.3    | 3.3                           | --            | --     | ND                            | --           | --     | ND                            |
|                          | 7/31/78                 | --               | --     | --                            | --            | 0.9    | 0.9                           | --           | 0.3    | 0.3                           |
|                          | 6/4/79                  | 5.7              | 6.2    | 6.2                           | 0.6           | 0.9    | 0.9                           | 0.1          | 0.1    | 0.1                           |
|                          | 7/6/79                  | 4.5              | 4.7    | 4.7                           | 1.0           | 1.1    | 1.1                           | 0.1          | 0.3    | 0.3                           |
|                          | 8/30/79                 | 4.8              | 4.5    | 4.5                           | 1.0           | 1.1    | 1.1                           | 0.1          | 0.0    | 0.0                           |

| Lake        | Date<br>lake<br>sampled | Total phosphorus |        |                               | Chlorophyll <u>a</u> |        |                               | Pheopigments |        |                               |
|-------------|-------------------------|------------------|--------|-------------------------------|----------------------|--------|-------------------------------|--------------|--------|-------------------------------|
|             |                         | Lake<br>ave.     | Integ. | Twice<br>Secchi<br>disc depth | Lake<br>ave.         | Integ. | Twice<br>Secchi<br>disc depth | Lake<br>ave. | Integ. | Twice<br>Secchi<br>disc depth |
| Mountain P. | 5/21/78                 | 20.3             | 23.3   | 28.3                          | --                   | --     | --                            | --           | --     | --                            |
|             | 6/13/78                 | --               | --     | --                            | --                   | --     | 8.4                           | --           | --     | 4.6                           |
|             | 7/22/78                 | --               | --     | --                            | --                   | --     | 2.4                           | --           | --     | 1.0                           |
|             | 8/18/78                 | --               | --     | --                            | --                   | 16.1   | 5.2                           | --           | 4.9    | 1.6                           |
|             | 5/14/79                 | 25.4             | 34.4   | ND                            | 7.8                  | 14.2   | ND                            | 4.6          | 7.0    | ND                            |
|             | 6/5/79                  | 23.8             | 35.6   | ND                            | 8.7                  | 14.6   | 4.7                           | 1.4          | 7.9    | 3.5                           |
|             | 8/22/79                 | 17.0             | 38.7   | ND                            | 8.6                  | 20.5   | ND                            | 3.0          | 16.2   | ND                            |
| Nicks P.    | 5/31/78                 | 4.1              | 3.6    | 3.6                           | --                   | --     | --                            | --           | --     | --                            |
|             | 7/8/78                  | --               | --     | --                            | --                   | --     | 3.8                           | --           | --     | 1.1                           |
|             | 7/17/78                 | --               | --     | --                            | --                   | --     | 4.0                           | --           | --     | 1.6                           |
|             | 8/14/78                 | --               | --     | --                            | --                   | 1.1    | 1.1                           | --           | 0.4    | 0.4                           |
|             | 5/18/79                 | 7.1              | 6.9    | 6.9                           | 3.1                  | 1.1    | 1.1                           | 0.5          | 0.3    | 0.3                           |
|             | 6/22/79                 | ND               | ND     | ND                            | 2.0                  | 1.1    | 1.1                           | -0.1         | 0.1    | 0.1                           |
|             | 8/22/79                 | 6.2              | 8.5    | ND                            | 1.2                  | 1.4    | 1.4                           | 0.2          | 0.2    | 0.2                           |
| Parch P.    | 6/27/78                 | --               | --     | --                            | --                   | --     | 3.1                           | --           | --     | 0.9                           |
|             | 8/6/78                  | --               | --     | --                            | --                   | 3.5    | 3.5                           | --           | 0.8    | 0.8                           |
|             | 5/6/79                  | 12.3             | 12.3   | ND                            | 5.6                  | 4.8    | 4.8                           | 0.8          | 1.4    | 1.4                           |
|             | 6/7/79                  | 11.1             | 13.0   | 13.0                          | 2.9                  | 7.1    | 7.1                           | 0.2          | -2.8   | -2.8                          |
|             | 8/8/79                  | 5.7              | 10.3   | 10.3                          | 3.2                  | 8.4    | 8.4                           | 1.9          | 11.1   | 11.1                          |
| Pine P.     | 5/22/78                 | 6.1              | 7.2    | 7.2                           | --                   | --     | --                            | --           | --     | --                            |
|             | 6/17/78                 | --               | --     | --                            | --                   | --     | 2.3                           | --           | --     | 0.5                           |
|             | 8/4/78                  | --               | --     | --                            | --                   | 3.6    | 3.6                           | --           | 0.9    | 0.9                           |
|             | 5/9/79                  | 6.9              | 8.4    | 8.4                           | 1.9                  | 2.5    | 2.5                           | 0.3          | 0.5    | 0.5                           |
|             | 6/8/79                  | 6.5              | 7.2    | 7.2                           | 2.5                  | 2.7    | 2.8                           | 0.1          | 0.9    | 0.2                           |
|             | 8/6/79                  | 8.4              | 9.9    | 9.9                           | 2.0                  | 2.6    | 2.6                           | 0.4          | 0.7    | 0.7                           |

| Lake              | Date<br>lake<br>sampled | Total phosphorus |        |                               | Chlorophyll a |        |                               | Pheopigments |        |                               |
|-------------------|-------------------------|------------------|--------|-------------------------------|---------------|--------|-------------------------------|--------------|--------|-------------------------------|
|                   |                         | Lake<br>ave.     | Integ. | Twice<br>Secchi<br>disc depth | Lake<br>ave.  | Integ. | Twice<br>Secchi<br>disc depth | Lake<br>ave. | Integ. | Twice<br>Secchi<br>disc depth |
| Rock P.           | 5/11/78                 | 6.6              | 7.2    | 7.2                           | --            | --     | --                            | --           | --     | --                            |
|                   | 6/14/78                 | --               | --     | --                            | --            | --     | 1.6                           | --           | --     | 1.1                           |
|                   | 7/16/78                 | --               | --     | --                            | --            | --     | 2.9                           | --           | --     | 2.0                           |
|                   | 8/3/78                  | --               | --     | --                            | --            | 5.6    | 3.2                           | --           | 5.8    | 2.0                           |
|                   | 5/4/79                  | 6.5              | 7.2    | 7.2                           | 1.1           | 0.9    | 0.9                           | 0.6          | 0.8    | 0.8                           |
|                   | 6/5/79                  | 8.0              | 7.8    | 7.8                           | 3.5           | 1.8    | 1.8                           | -0.7         | 1.2    | 1.2                           |
|                   | 8/5/79                  | 7.6              | 13.1   | 13.1                          | 2.3           | 4.9    | 4.9                           | 1.3          | 4.8    | 4.8                           |
| Round P.          | 5/10/78                 | 4.1              | 4.1    | 4.1                           | --            | --     | --                            | --           | --     | --                            |
|                   | 6/6/78                  | --               | --     | --                            | --            | --     | 3.0                           | --           | --     | 0.7                           |
|                   | 7/19/78                 | --               | --     | --                            | --            | --     | 4.1                           | --           | --     | 2.2                           |
|                   | 8/16/78                 | --               | --     | --                            | --            | 2.8    | 2.8                           | --           | 1.0    | 1.0                           |
|                   | 5/17/79                 | 6.8              | 6.8    | 6.8                           | 1.0           | 1.7    | 1.7                           | 0.7          | 0.6    | 0.6                           |
|                   | 6/18/79                 | 7.6              | 6.9    | 6.9                           | 0.9           | 1.7    | 1.7                           | 0.1          | 0.4    | 0.4                           |
|                   | 8/13/79                 | 6.8              | 6.7    | 6.7                           | 2.6           | 4.6    | 4.6                           | 0.7          | 1.2    | 1.2                           |
| U. Wallface<br>P. | 6/10/78                 | 2.2              | 2.3    | 2.3                           | --            | --     | 1.4                           | --           | --     | 0.8                           |
|                   | 7/18/78                 | --               | --     | --                            | --            | --     | 0.6                           | --           | --     | 0.9                           |
|                   | 8/15/78                 | --               | --     | --                            | --            | 0.2    | 0.2                           | --           | 0.3    | 0.3                           |
|                   | 5/15/79                 | 3.6              | 4.1    | 4.1                           | 1.1           | 1.4    | 1.4                           | 0.2          | 0.0    | 0.0                           |
|                   | 6/17/79                 | 4.3              | 4.4    | 4.4                           | 2.2           | 2.3    | 2.3                           | 0.5          | 1.0    | 1.0                           |
|                   | 8/12/79                 | 2.2              | 2.1    | 2.1                           | 0.4           | 0.2    | 0.2                           | 0.1          | 0.3    | 0.3                           |
| Washbowl          | 5/26/78                 | 70.0             | 27.7   | 27.7                          | --            | --     | --                            | --           | --     | --                            |
|                   | 7/10/78                 | --               | --     | --                            | --            | --     | 15.9                          | --           | --     | 11.6                          |
|                   | 8/20/78                 | --               | --     | --                            | --            | 4.2    | 4.2                           | --           | 1.3    | 1.3                           |
|                   | 5/12/79                 | 63.9             | 77.7   | 77.7                          | 28.0          | 29.1   | 29.1                          | 12.7         | 14.6   | 14.6                          |
|                   | 6/13/79                 | 71.4             | 71.4   | 71.4                          | 20.7          | 26.0   | 26.0                          | 18.7         | 14.7   | 14.7                          |
|                   | 8/20/79                 | 53.2             | 53.2   | 53.2                          | 33.6          | 33.6   | 33.6                          | 14.6         | 14.6   | 14.6                          |



| Lake        | Date<br>lake<br>sampled | Total phosphorus |        |                               | Chlorophyll <u>a</u> |        |                               | Pheopigments |        |                               |
|-------------|-------------------------|------------------|--------|-------------------------------|----------------------|--------|-------------------------------|--------------|--------|-------------------------------|
|             |                         | Lake<br>ave.     | Integ. | Twice<br>Secchi<br>disc depth | Lake<br>ave.         | Integ. | Twice<br>Secchi<br>disc depth | Lake<br>ave. | Integ. | Twice<br>Secchi<br>disc depth |
| Wolf L.     | 5/30/78                 | 3.0              | 2.8    | 2.8                           | --                   | --     | --                            | --           | --     | --                            |
|             | 6/29/78                 | --               | --     | --                            | --                   | --     | 1.1                           | --           | --     | 0.2                           |
|             | 7/24/78                 | --               | --     | --                            | --                   | --     | 1.1                           | --           | --     | 0.3                           |
|             | 8/13/78                 | --               | --     | --                            | --                   | 0.7    | 0.7                           | --           | 0.5    | 0.5                           |
|             | 5/28/79                 | 5.0              | 4.2    | 4.2                           | 0.9                  | 0.9    | 0.9                           | 0.1          | 0.2    | 0.2                           |
|             | 6/20/79                 | 4.5              | 5.2    | 5.2                           | 0.5                  | 0.5    | 0.5                           | 0.1          | 0.1    | 0.1                           |
|             | 8/25/79                 | 5.7              | 7.2    | 7.2                           | 0.9                  | 0.8    | 0.8                           | 0.2          | 0.0    | 0.0                           |
| Bass L.     | 5/21/78                 | 14.0             | 23.2   | 23.2                          | --                   | --     | --                            | --           | --     | --                            |
|             | 6/13/78                 | --               | --     | --                            | --                   | --     | 9.4                           | --           | --     | 13.2                          |
|             | 8/18/78                 | --               | --     | --                            | --                   | 13.1   | 13.1                          | --           | 6.1    | 6.1                           |
| Blue Mt. L. | 5/29/78                 | 3.3              | 3.3    | 3.3                           | --                   | --     | --                            | --           | --     | --                            |
|             | 6/26/78                 | --               | --     | --                            | --                   | --     | 2.2                           | --           | --     | 0.6                           |
|             | 7/28/78                 | --               | --     | --                            | --                   | --     | 1.9                           | --           | --     | 0.7                           |
| Brandy P.   | 5/17/78                 | 12.9             | 12.9   | 12.6                          | --                   | --     | --                            | --           | --     | --                            |
|             | 6/9/78                  | --               | --     | --                            | --                   | --     | 12.1                          | --           | --     | 10.1                          |
|             | 7/16/78                 | --               | --     | --                            | --                   | --     | 17.9                          | --           | --     | 32.6                          |
|             | 8/3/78                  | --               | --     | --                            | --                   | 25.8   | 25.8                          | --           | 25.5   | 25.5                          |
| Brant L.    | 5/9/78                  | 5.7              | 5.7    | 5.7                           | --                   | --     | --                            | --           | --     | --                            |
|             | 6/12/78                 | --               | --     | --                            | --                   | --     | 2.4                           | --           | --     | 0.8                           |
|             | 8/2/78                  | --               | --     | --                            | --                   | ND     | 2.6                           | --           | ND     | 0.8                           |

| Lake       | Date<br>lake<br>sampled | Total phosphorus |        |                               | Chlorophyll a |        |                               | Pheopigments |        |                               |
|------------|-------------------------|------------------|--------|-------------------------------|---------------|--------|-------------------------------|--------------|--------|-------------------------------|
|            |                         | Lake<br>ave.     | Integ. | Twice<br>Secchi<br>disc depth | Lake<br>ave.  | Integ. | Twice<br>Secchi<br>disc depth | Lake<br>ave. | Integ. | Twice<br>Secchi<br>disc depth |
| Heart L.   | 5/14/78                 | 5.2              | 6.0    | 6.0                           | --            | --     | --                            | --           | --     | --                            |
|            | 6/4/78                  | --               | --     | --                            | --            | --     | 10.0                          | --           | --     | 3.4                           |
|            | 7/22/78                 | --               | --     | --                            | --            | --     | 3.9                           | --           | --     | 1.4                           |
|            | 8/16/78                 | --               | --     | --                            | --            | 4.8    | 4.8                           | --           | 2.8    | 2.8                           |
|            | 5/16/79                 | 7.1              | 6.6    | ND                            | 3.6           | 4.3    | 2.9                           | 0.1          | 0.8    | 0.7                           |
|            | 6/16/79                 | 6.9              | 8.9    | 8.5                           | 2.1           | 2.4    | 3.0                           | 1.0          | 1.4    | 1.1                           |
|            | 8/11/79                 | 4.0              | 5.2    | ND                            | 3.0           | 4.1    | 5.3                           | 0.9          | 1.3    | 0.8                           |
| Huntley P. | 5/17/78                 | 6.6              | 6.2    | 6.5                           | --            | --     | --                            | --           | --     | --                            |
|            | 6/22/78                 | --               | --     | --                            | --            | --     | ND                            | --           | --     | ND                            |
|            | 7/26/78                 | --               | --     | --                            | --            | --     | 4.1                           | --           | --     | 1.4                           |
|            | 8/12/78                 | --               | --     | --                            | --            | 4.6    | 3.5                           | --           | 1.9    | 0.8                           |
|            | 5/31/79                 | 8.4              | 7.9    | ND                            | 1.3           | 0.7    | ND                            | 0.5          | 0.3    | ND                            |
|            | 6/28/79                 | 6.6              | 8.1    | 6.7                           | 3.1           | 2.9    | 3.6                           | 1.4          | 2.8    | 0.6                           |
|            | 8/28/79                 | 7.8              | 8.3    | ND                            | 5.2           | 6.6    | --                            | 2.6          | 6.4    | --                            |
| Jenkins P. | 6/1/78                  | 1.5              | 1.6    | 1.6                           | --            | --     | ND                            | --           | --     | ND                            |
|            | 7/31/78                 | --               | --     | --                            | --            | --     | 0.5                           | --           | --     | 0.2                           |
|            | 6/4/79                  | 3.0              | 2.1    | 2.1                           | 0.4           | 0.4    | 0.4                           | 0.1          | 0.2    | 0.2                           |
|            | 7/6/79                  | 2.0              | 2.2    | 2.2                           | 0.5           | 0.5    | 0.5                           | 0.2          | 0.1    | 0.1                           |
|            | 8/30/79                 | 3.2              | 3.3    | 3.3                           | 0.8           | 1.0    | 1.0                           | ~.1          | 0.0    | 0.0                           |
| L. Arnold  | 5/23/79                 | 3.0              | 3.4    | 3.4                           | 0.6           | 0.6    | 0.6                           | 0.1          | 0.1    | 0.1                           |
|            | 8/2/79                  | 5.4              | 5.0    | 5.0                           | 1.3           | 1.0    | 1.0                           | 0.1          | 0.5    | 0.5                           |
| L. Colden  | 6/23/78                 | 2.7              | 3.8    | 3.8                           | --            | --     | 2.7                           | --           | --     | 0.3                           |
|            | 8/17/78                 | --               | --     | --                            | --            | 0.7    | 0.7                           | --           | 0.5    | 0.5                           |
