# Supplementary material
Source: publisher figshare collection journal article supplement (https://wiley.figshare.com/articles/dataset/_/3521588)
Supplement: Supplementary file 4 [file 1]

Table 6 . Secchi disc, Forel-Ule color, platinum cobalt color and conductivity measurements for Adirondack study lakes. A Forel-Ule color of 21+ indicates color was darker brown than highest reading on scale.

| Lake         | Date<br>lake<br>sampled | Depth<br>of<br>integ.<br>sample<br>m | Secchi<br>disc<br>m | Forel-<br>Ule<br>color | Color                 |      |           |      |        |      | Conductivity<br>µS/cm at 25°C |           |        |  |
|--------------|-------------------------|--------------------------------------|---------------------|------------------------|-----------------------|------|-----------|------|--------|------|-------------------------------|-----------|--------|--|
|              |                         |                                      |                     |                        | Platinum-Cobalt units |      |           |      |        |      |                               |           |        |  |
|              |                         |                                      |                     |                        | Surf.                 |      | Lake ave. |      | Integ. |      |                               |           |        |  |
|              |                         |                                      |                     |                        | Appt.                 | True | Appt.     | True | Appt.  | True | Surf.                         | Lake ave. | Integ. |  |
| Arbutus L.   | 5/30/78                 | ND                                   | 4.0                 | ---                    | ND                    | ---  | ---       | ---  | ND     | ND   | 28.2                          | ---       | 28.2   |  |
|              | 6/29/78                 | ND                                   | 5.2                 | ---                    | ND                    | ---  | ---       | ---  | ND     | ND   | 26.0                          | ---       | 26.6   |  |
|              | 7/24/78                 | 7.2                                  | 4.1                 | 16                     | 25                    | ---  | ---       | ---  | 30     | 30   | 26.5                          | ---       | 27.5   |  |
|              | 8/13/78                 | 7.0                                  | 4.8                 | 14                     | 25                    | ---  | ---       | ---  | 35     | 20   | 25.3                          | ---       | 27.5   |  |
|              | 5/28/79                 | 7.6                                  | 5.7                 | 14                     | 25                    | 25   | 30        | 25   | 30     | 25   | 25.5                          | 26.1      | 26.4   |  |
|              | 6/20/79                 | 7.0                                  | 4.3                 | 19                     | 35                    | 35   | 35        | 30   | 35     | 35   | 25.4                          | 25.5      | 25.8   |  |
|              | 8/25/79                 | 7.0                                  | 5.0                 | 18                     | 15                    | 15   | 25        | 15   | 25     | 15   | 27.0                          | 27.8      | 28.3   |  |
| Avalanche L. | 6/23/78                 | 6.5                                  | 4.0                 | 16                     | 35                    | ---  | ---       | ---  | 40     | 35   | 21.9                          | ---       | 20.2   |  |
|              | 7/20/78                 | 6.0                                  | 6.5                 | 17                     | 25                    | ---  | ---       | ---  | 25     | 20   | 21.7                          | ---       | 21.7   |  |
|              | 8/17/78                 | 7.0                                  | 4.8                 | 17                     | 35                    | ---  | ---       | ---  | 35     | 35   | 24.7                          | ---       | 25.4   |  |
|              | 5/18/79                 | 6.0                                  | 4.3                 | 21                     | 45                    | 45   | 45        | 35   | 45     | 35   | 27.4                          | 27.8      | 27.8   |  |
|              | 6/19/79                 | 7.0                                  | 4.7                 | 21                     | 40                    | 30   | 40        | 30   | 40     | 30   | 24.5                          | 24.8      | 23.9   |  |
|              | 8/9/79                  | 7.0                                  | 4.4                 | 15                     | ND                    | ND   | 30        | 15   | 35     | 15   | 25.4                          | 25.2      | 24.2   |  |
| Bear P.      | 5/23/78                 | 18.0                                 | 6.0                 | ---                    | 0                     | ---  | ---       | ---  | 0      | ND   | 26.0                          | ---       | 26.9   |  |
|              | 7/12/78                 | 16.0                                 | 10.4                | 4                      | 0                     | ---  | ---       | ---  | 0      | 0    | 22.8                          | ---       | 26.0   |  |
|              | 8/10/78                 | 16.0                                 | 9.8                 | 5                      | 10                    | ---  | ---       | ---  | 15     | 7.5  | 25.8                          | ---       | 26.1   |  |
|              | 5/25/79                 | 16.0                                 | 10.2                | 6                      | 7.5                   | 7.5  | 15.0      | 7.5  | 15     | 7.5  | 24.6                          | 25.3      | 25.3   |  |
|              | 6/26/79                 | 16.0                                 | 12.7                | 5                      | 7.5                   | 0    | 7.5       | 0    | 7.5    | 0    | 24.3                          | 24.8      | 24.7   |  |
|              | 8/23/79                 | 16.0                                 | 10.3                | 5                      | 2.5                   | 2.5  | 7.5       | 2.5  | 7.5    | 7.5  | 25.3                          | 25.3      | 25.2   |  |

| Lake                  | Date<br>lake<br>sampled | Depth<br>of<br>integ.<br>sample<br>m | Secchi<br>disc<br>m | Forel-<br>Ule<br>color | Color<br>Platinum-Cobalt units |      |           |      |        |      | Conductivity<br>μS/cm at 25°C |      |      |        |
|-----------------------|-------------------------|--------------------------------------|---------------------|------------------------|--------------------------------|------|-----------|------|--------|------|-------------------------------|------|------|--------|
|                       |                         |                                      |                     |                        | Surf.                          |      | Lake ave. |      | Integ. |      | Surf.                         | Lake | ave. | Integ. |
|                       |                         |                                      |                     |                        | Appt.                          | True | Appt.     | True | Appt.  | True |                               |      |      |        |
| Bog P.                | 5/23/78                 | 4.0                                  | 1.6                 | —                      | 55                             | —    | —         | —    | 55     | ND   | 13.4                          | —    | 14.4 |        |
|                       | 7/12/78                 | 4.0                                  | 1.9                 | 21+                    | 90                             | —    | —         | —    | 200    | 80   | 12.5                          | —    | 14.9 |        |
|                       | 8/10/78                 | 3.0                                  | 1.9                 | 21+                    | 75                             | —    | —         | —    | 200    | 125  | 10.5                          | —    | 14.1 |        |
|                       | 5/25/79                 | 3.5                                  | 1.9                 | 21+                    | 70                             | 70   | 145       | 90   | 140    | 100  | 12.9                          | 14.4 | 14.6 |        |
|                       | 6/26/79                 | 3.5                                  | 2.2                 | 21+                    | 50                             | 50   | ND        | ND   | 120    | 65   | 11.9                          | 11.9 | 11.3 |        |
|                       | 8/23/79                 | 4.0                                  | 2.0                 | 21+                    | 55                             | 55   | 85        | 85   | 90     | 90   | 10.0                          | 13.3 | 14.9 |        |
|                       |                         |                                      |                     |                        |                                |      |           |      |        |      |                               |      |      |        |
| Cat Mt. P.            | 7/9/78                  | 9.0                                  | 7.3                 | 14                     | 7.5                            | —    | —         | —    | 15     | 7.5  | 22.1                          | —    | 22.4 |        |
|                       | 8/19/78                 | 9.0                                  | 9.2                 | 10                     | 7.5                            | —    | —         | —    | 15     | 15   | 22.2                          | —    | 21.8 |        |
|                       | 5/11/79                 | 8.0                                  | 5.8                 | 12                     | 10                             | 10   | 15        | 15   | 15     | 15   | 24.3                          | 23.8 | ND   |        |
|                       | 6/11/79                 | 9.0                                  | 6.9                 | 9                      | 7.5                            | 7.5  | 7.5       | 7.5  | 7.5    | 7.5  | 21.9                          | 21.0 | 21.2 |        |
|                       | 8/17/79                 | 7.0                                  | 8.0                 | 8                      | 10                             | 7.5  | 10        | 7.5  | 10     | 10   | 23.7                          | 23.7 | 23.3 |        |
|                       |                         |                                      |                     |                        |                                |      |           |      |        |      |                               |      |      |        |
| Clear P.              | 5/12/78                 | 13.0                                 | 9.0                 | —                      | 0                              | —    | —         | —    | 0      | ND   | ND                            | —    | 36.9 |        |
|                       | 6/20/78                 | 14.0                                 | 6.9                 | 10                     | 7.5                            | —    | —         | —    | 15     | 7.5  | 34.4                          | —    | 35.8 |        |
|                       | 7/15/78                 | 16.0                                 | 8.5                 | 8                      | 2.5                            | —    | —         | —    | 7.5    | 2.5  | 35.5                          | —    | 43.6 |        |
|                       | 8/9/78                  | 13.0                                 | 8.0                 | 8                      | 10                             | —    | —         | —    | 10     | 7.5  | 33.8                          | —    | 34.3 |        |
|                       | 5/8/79                  | 16.0                                 | 9.0                 | 8                      | 7.5                            | 7.5  | 10        | 7.5  | 15     | 7.5  | 30.0                          | 33.7 | 35.6 |        |
|                       | 6/9/79                  | 16.0                                 | 10.0                | 7                      | 5                              | 5    | 5         | 5    | 7.5    | 7.5  | 32.1                          | 34.2 | 35.5 |        |
|                       | 8/7/79                  | 16.0                                 | 8.7                 | 7                      | 10                             | 7.5  | 10        | 5    | 10     | 10   | 33.0                          | 34.0 | 35.2 |        |
|                       |                         |                                      |                     |                        |                                |      |           |      |        |      |                               |      |      |        |
| Copperas P.<br>(F.C.) | 5/15/78                 | 5.0                                  | 1.6                 | —                      | 15                             | —    | —         | —    | 7.5    | ND   | 42.5                          | —    | 43.1 |        |
|                       | 6/8/78                  | 6.0                                  | 3.3                 | —                      | 7.5                            | —    | —         | —    | 30     | 7.5  | 50.6                          | —    | 48.5 |        |
|                       | 7/14/78                 | 5.0                                  | 3.6                 | 12                     | 7.5                            | —    | —         | —    | 20     | 15   | 46.7                          | —    | 46.9 |        |
|                       | 8/5/78                  | 5.0                                  | 3.7                 | 15                     | 15                             | —    | —         | —    | 35     | 15   | 46.1                          | —    | 48.6 |        |
|                       | 5/21/79                 | 6.0                                  | 3.6                 | 14                     | 15                             | 15   | 25        | 15   | 25     | 25   | 31.3                          | 37.5 | 31.7 |        |
|                       | 6/23/79                 | 6.0                                  | 3.3                 | 14                     | 40                             | 30   | 35        | 25   | 35     | 20   | 45.1                          | 44.6 | 50.9 |        |
|                       | 8/27/79                 | 4.0                                  | 3.6                 | 12                     | 15                             | 10   | 25        | 10   | 30     | 10   | 50.7                          | 50.5 | 52.7 |        |
|                       |                         |                                      |                     |                        |                                |      |           |      |        |      |                               |      |      |        |

| Lake              | Date<br>lake<br>sampled | Depth<br>of<br>integ.<br>sample<br>m | Secchi<br>disc<br>m | Forel-<br>Ule<br>color | Color<br>Platinum-Cobalt units |      |           |      |        |      | Conductivity<br>$\mu\text{S}/\text{cm}$ at 25°C |           |        |
|-------------------|-------------------------|--------------------------------------|---------------------|------------------------|--------------------------------|------|-----------|------|--------|------|-------------------------------------------------|-----------|--------|
|                   |                         |                                      |                     |                        | Surf.                          |      | Lake ave. |      | Integ. |      | Surf.                                           | Lake ave. | Integ. |
|                   |                         |                                      |                     |                        | Appt.                          | True | Appt.     | True | Appt.  | True |                                                 |           |        |
| Deer L.           | 5/30/78                 | 3.0                                  | 3.3                 | --                     | ND                             | --   | --        | --   | ND     | ND   | 28.2                                            | --        | 28.1   |
|                   | 6/6/78                  | 3.0                                  | 2.9                 | 17                     | 25                             | --   | --        | --   | 35     | 25   | 29.4                                            | --        | 28.5   |
|                   | 7/24/78                 | 3.0                                  | 2.8                 | 15                     | 35                             | --   | --        | --   | 25     | 20   | 34.1                                            | --        | 30.6   |
|                   | 8/13/78                 | 3.0                                  | 3.0                 | 16                     | 30                             | --   | --        | --   | 30     | 25   | 30.5                                            | --        | 31.2   |
|                   | 5/28/79                 | 3.0                                  | 3.5                 | 16                     | 25                             | 25   | 25        | 25   | 25     | 25   | 27.5                                            | 28.2      | 28.6   |
|                   | 6/20/79                 | 3.0                                  | 3.0                 | 17                     | 35                             | 25   | 35        | 25   | 35     | 25   | 28.4                                            | 28.1      | 28.1   |
|                   | 8/25/79                 | 3.0                                  | 2.9                 | 16                     | 15                             | 15   | 15        | 15   | 20     | 15   | 31.3                                            | 31.3      | 31.6   |
| Dunk P.           | 5/17/78                 | 12.0                                 | 3.0                 | --                     | 35                             | --   | --        | --   | ND     | ND   | 40.2                                            | --        | 41.4   |
|                   | 6/22/78                 | 8.0                                  | 3.8                 | 21+                    | 40                             | --   | --        | --   | 40     | 40   | 45.2                                            | --        | 46.1   |
|                   | 7/26/78                 | 8.6                                  | 4.3                 | 19                     | 35                             | --   | --        | --   | 45     | 40   | 46.4                                            | --        | 46.9   |
|                   | 8/11/78                 | 9.2                                  | 4.6                 | 19                     | 40                             | --   | --        | --   | 50     | 40   | 48.7                                            | --        | 45.3   |
|                   | 5/31/79                 | 12.0                                 | ND                  | 21+                    | 40                             | 40   | 45        | 45   | 40     | 35   | 46.4                                            | 47.4      | 56.0   |
|                   | 6/28/79                 | 12.0                                 | 4.7                 | 21+                    | 40                             | 40   | 40        | 40   | 50     | 40   | 45.4                                            | 46.3      | 53.9   |
|                   | 8/28/79                 | 12.0                                 | 4.2                 | 21+                    | 45                             | 35   | 55        | 45   | 50     | 45   | 47.7                                            | 47.4      | 56.4   |
| E. Copperas<br>P. | 5/15/78                 | 4.0                                  | 1.5                 | --                     | 50                             | --   | --        | --   | 65     | ND   | 18.9                                            | --        | 21.5   |
|                   | 6/8/78                  | 4.0                                  | 2.4                 | --                     | 70                             | --   | --        | --   | 70     | 80   | 24.5                                            | --        | 24.5   |
|                   | 7/14/78                 | 4.0                                  | 2.3                 | 21+                    | 50                             | --   | --        | --   | 70     | 60   | 28.5                                            | --        | 31.9   |
|                   | 8/5/78                  | 4.0                                  | 2.7                 | 21+                    | 60                             | --   | --        | --   | 80     | 80   | 20.2                                            | --        | 21.4   |
|                   | 5/21/79                 | 4.0                                  | 1.9                 | 21                     | 65                             | 45   | 90        | 70   | 90     | 70   | 20.7                                            | 18.7      | 17.6   |
|                   | 6/23/79                 | 4.0                                  | 2.3                 | 21+                    | 40                             | 30   | 105       | 75   | 70     | 40   | 21.8                                            | 21.6      | 21.6   |
|                   | 8/27/79                 | 4.0                                  | 2.4                 | 21                     | 35                             | 25   | 55        | 35   | 55     | 35   | 25.1                                            | 22.7      | 26.4   |

| Lake                | Date<br>lake<br>sampled | Depth<br>of<br>integ.<br>sample<br>m | Secchi<br>disc<br>m | Forel-<br>Ule<br>color | Color<br>Platinum-Cobalt units |      |           |      |        |      | Conductivity<br>$\mu\text{S/cm}$ at 25°C |           |        |
|---------------------|-------------------------|--------------------------------------|---------------------|------------------------|--------------------------------|------|-----------|------|--------|------|------------------------------------------|-----------|--------|
|                     |                         |                                      |                     |                        | Surf.                          |      | Lake ave. |      | Integ. |      | Surf.                                    | Lake ave. | Integ. |
|                     |                         |                                      |                     |                        | Appt.                          | True | Appt.     | True | Appt.  | True |                                          |           |        |
| Frank P.            | 6/22/78                 | 11.5                                 | 7.9                 | 12                     | 7.5                            | --   | --        | --   | 7.5    | 7.5  | ND                                       | --        | 26.5   |
|                     | 7/26/78                 | 11.0                                 | 7.9                 | 10                     | 15                             | --   | --        | --   | 20     | ND   | 23.6                                     | --        | 24.4   |
|                     | 8/11/78                 | 9.0                                  | 8.4                 | 10                     | 10                             | --   | --        | --   | 15     | 7.5  | 23.8                                     | --        | 24.1   |
|                     | 5/31/79                 | 11.0                                 | 8.6                 | 12                     | 10                             | 7.5  | 7.5       | 7.5  | 7.5    | 7.5  | 24.3                                     | 24.4      | 25.3   |
|                     | 6/28/79                 | 11.0                                 | 6.3                 | 12                     | 7.5                            | 5.0  | 10        | 10   | 10     | 10   | 23.0                                     | 23.0      | 24.0   |
|                     | 8/28/79                 | 11.0                                 | 8.1                 | 10                     | ND                             | ND   | 15        | 7.5  | 15     | 7.5  | 23.1                                     | 22.7      | 23.7   |
| Giant's<br>Washbowl | 5/10/78                 | 7.0                                  | 5.3                 | --                     | 5                              | --   | --        | --   | 10     | ND   | 27.5                                     | --        | 34.7   |
|                     | 6/6/78                  | 10.0                                 | 5.0                 | --                     | 15                             | --   | --        | --   | 15     | 0    | 35.5                                     | --        | 37.8   |
|                     | 7/13/78                 | 5.0                                  | 5.6                 | 12                     | 7.5                            | --   | --        | --   | 20     | 15   | 34.7                                     | --        | 35.1   |
|                     | 8/8/78                  | 5.0                                  | 4.8                 | 15                     | 15                             | --   | --        | --   | 15     | 15   | 35.0                                     | --        | 39.3   |
|                     | 5/5/79                  | 6.0                                  | 4.6                 | 16                     | 25                             | ND   | 25        | 20   | 25     | 15   | 30.3                                     | 30.3      | 30.9   |
|                     | 6/6/79                  | 5.0                                  | 5.9                 | 17                     | 15                             | 15   | 15        | 15   | 15     | 15   | 33.5                                     | 34.4      | 34.4   |
|                     | 8/4/79                  | 6.0                                  | 4.3                 | 16                     | 15                             | 15   | 20        | 15   | 25     | 15   | 32.1                                     | 35.8      | 37.5   |
| Green P.            | 5/23/78                 | 8.0                                  | 6.5                 | --                     | 2.5                            | --   | --        | --   | 7.5    | ND   | 21.1                                     | --        | 21.3   |
|                     | 7/12/78                 | 8.5                                  | ND                  | --                     | 5                              | --   | --        | --   | 7.5    | 2.5  | 20.0                                     | --        | 20.9   |
|                     | 8/10/78                 | 7.0                                  | 6.4                 | 12                     | 15                             | --   | --        | --   | 25     | 10   | 18.6                                     | --        | 18.7   |
|                     | 5/25/79                 | 8.0                                  | 6.7                 | 7                      | ND                             | ND   | 15        | 15   | 15     | 15   | ND                                       | 19.3      | 19.8   |
|                     | 6/26/79                 | 7.0                                  | 7.4                 | 12                     | 15                             | 2.5  | 15        | 2.5  | 15     | 2.5  | 19.2                                     | 18.6      | 18.6   |
|                     | 8/23/79                 | 7.0                                  | 6.3                 | 10                     | 10                             | 7.5  | 15        | 15   | 7.5    | 5    | 19.0                                     | 19.7      | 19.6   |
| Gull P.             | 5/12/78                 | 11.0                                 | 4.3                 | --                     | 7.5                            | --   | --        | --   | 15     | ND   | 32.5                                     | --        | 37.7   |
|                     | 6/20/78                 | 7.0                                  | 3.5                 | --                     | 25                             | --   | --        | --   | 25     | 15   | 32.0                                     | --        | ND     |
|                     | 7/15/78                 | 9.0                                  | 4.4                 | 15                     | 15                             | --   | --        | --   | 25     | 7.5  | ND                                       | --        | ND     |
|                     | 8/9/78                  | 9.2                                  | 4.6                 | 15                     | 15                             | --   | --        | --   | 35     | ND   | 33.1                                     | --        | 38.8   |
|                     | 5/8/79                  | 10.5                                 | 4.6                 | 15                     | 15                             | ND   | 20        | 25   | 25     | 25   | 33.5                                     | 36.0      | 37.6   |
|                     | 6/9/79                  | 11.0                                 | 3.9                 | 16                     | 15                             | 10   | 15        | 10   | 25     | 20   | 31.0                                     | 38.5      | 34.2   |
|                     | 8/7/79                  | 11.0                                 | 4.6                 | 14                     | 20                             | 20   | 30        | 20   | 45     | 20   | 33.6                                     | 37.4      | 39.1   |

| Lake       | Date<br>lake<br>sampled | Depth<br>of<br>integ.<br>sample<br>m | Secchi<br>disc<br>m | Forel-<br>Ule<br>color | Color<br>Platinum-Cobalt units |      |           |      |        |      | Conductivity<br>µS/cm at 25°C |           |        |
|------------|-------------------------|--------------------------------------|---------------------|------------------------|--------------------------------|------|-----------|------|--------|------|-------------------------------|-----------|--------|
|            |                         |                                      |                     |                        | Surf.                          |      | Lake ave. |      | Integ. |      | Surf.                         | Lake ave. | Integ. |
|            |                         |                                      |                     |                        | Appt.                          | True | Appt.     | True | Appt.  | True |                               |           |        |
| Heart L.   | 5/14/78                 | 12.5                                 | 5.5                 | --                     | 0                              | --   | --        | --   | 5      | ND   | 22.4                          | --        | 23.1   |
|            | 6/4/78                  | 10.0                                 | 5.1                 | --                     | 5                              | --   | --        | --   | 7.5    | 2.5  | 21.1                          | --        | 21.5   |
|            | 6/7/78                  | ND                                   | 5.6                 | ND                     | ND                             | --   | --        | --   | ND     | ND   | ND                            | --        | ND     |
|            | 7/21/78                 | 9.0                                  | 4.6                 | 12                     | 15                             | --   | --        | --   | 25     | 10   | 19.7                          | --        | 19.9   |
|            | 8/16/78                 | 13.0                                 | 5.7                 | 10                     | 15                             | --   | --        | --   | 15     | 7.5  | 20.9                          | --        | 22.7   |
|            | 5/16/79                 | 12.0                                 | 4.0                 | 13                     | 25                             | 25   | 15        | 15   | 25     | 25   | 20.9                          | 21.1      | 21.2   |
|            | 6/16/79                 | 12.0                                 | 4.3                 | 12                     | 15                             | 5    | 15        | 7.5  | 15     | 7.5  | 19.7                          | 20.2      | 20.7   |
|            | 8/11/79                 | 13.0                                 | 4.8                 | 10                     | 10                             | 7.5  | 10        | 10   | 10     | 10   | 20.3                          | 20.7      | 22.1   |
| Huntley P. | 5/17/78                 | 10.5                                 | 3.5                 | --                     | 35                             | --   | --        | --   | 35     | ND   | 54.1                          | --        | 59.2   |
|            | 6/22/78                 | ND                                   | ND                  | --                     | 35                             | --   | --        | --   | ND     | ND   | 59.5                          | --        | ND     |
|            | 7/26/78                 | 6.4                                  | 3.2                 | 16                     | 35                             | --   | --        | --   | 35     | 25   | 60.0                          | --        | 60.0   |
|            | 8/12/78                 | 6.0                                  | 2.9                 | 16                     | 30                             | --   | --        | --   | 45     | 25   | 60.1                          | --        | 65.3   |
|            | 5/31/79                 | 12.0                                 | 4.9                 | 21                     | 25                             | 25   | 35        | 25   | 25     | 25   | 57.9                          | 60.1      | 62.2   |
|            | 6/28/79                 | 12.0                                 | 3.9                 | 19                     | 30                             | 20   | 30        | 20   | 30     | 20   | 57.7                          | 58.0      | 61.8   |
|            | 8/28/79                 | 11.0                                 | 3.3                 | 16                     | 25                             | 25   | 35        | 25   | 35     | 25   | 61.6                          | 59.9      | 64.9   |
|            |                         |                                      |                     |                        |                                |      |           |      |        |      |                               |           |        |
| Jenkins P. | 6/1/78                  | 13.0                                 | 8.5                 | --                     | 0                              | --   | --        | --   | 0      | 0    | 29.1                          | --        | 29.2   |
|            | 7/31/78                 | 16.0                                 | 10.7                | 5                      | 15                             | --   | --        | --   | 15     | 7.5  | ND                            | --        | 27.8   |
|            | 6/4/79                  | 16.0                                 | 13.3                | 6                      | 2.5                            | 2.5  | 2.5       | 2.5  | 2.5    | 2.5  | 29.1                          | 29.3      | 29.5   |
|            | 7/6/79                  | 16.0                                 | 13.8                | 6                      | 2.5                            | 2.5  | 2.5       | 2.5  | ND     | ND   | 28.1                          | ND        | ND     |
|            | 8/30/79                 | 16.0                                 | 10.3                | 6                      | 2.5                            | 2.5  | 2.5       | 2.5  | 2.5    | 2.5  | 28.9                          | 29.2      | 28.8   |
| L. Arnold  | 5/23/79                 | 2.0                                  | 2.4                 | 15                     | 25                             | 25   | 30        | 25   | 35     | 30   | 19.7                          | 19.7      | 19.9   |
|            | 8/2/79                  | 2.0                                  | 2.3                 | 12                     | 15                             | 15   | 15        | 15   | 15     | 15   | 21.9                          | 21.4      | 21.1   |
| L. Colden  | 6/23/78                 | 7.0                                  | 6.4                 | 16                     | 25                             | --   | --        | --   | 25     | 25   | 23.0                          | --        | 21.3   |
|            | 8/17/78                 | 5.0                                  | 6.3                 | 12                     | 15                             | --   | --        | --   | 25     | 25   | 23.9                          | --        | 25.0   |

| Lake                     | Date<br>lake<br>sampled | Depth<br>of<br>integ.<br>sample<br>m | Secchi<br>disc<br>m | Forel-<br>Ule<br>color | Color<br>Platinum-Cobalt units |      |           |      |        |      | Conductivity<br>$\mu\text{S/cm}$ at 25°C |           |        |
|--------------------------|-------------------------|--------------------------------------|---------------------|------------------------|--------------------------------|------|-----------|------|--------|------|------------------------------------------|-----------|--------|
|                          |                         |                                      |                     |                        | Surf.                          |      | Lake ave. |      | Integ. |      | Surf.                                    | Lake ave. | Integ. |
|                          |                         |                                      |                     |                        | Appt.                          | True | Appt.     | True | Appt.  | True |                                          |           |        |
| L. Tear of<br>the Clouds | 5/22/79                 | 0.5                                  | 0.8                 | ND                     | 35                             | 30   | 35        | 30   | 35     | 30   | 19.0                                     | 22.0      | 22.0   |
|                          | 8/2/79                  | 0.5                                  | 0.8                 | ND                     | 30                             | 30   | 30        | 30   | 30     | 30   | 28.4                                     | 28.4      | 28.4   |
| L. Pine P.               | 8/4/78                  | 1.0                                  | ND                  | ND                     | ND                             | --   | --        | --   | 15     | ND   | ND                                       | --        | 69.6   |
|                          | 5/9/79                  | 1.0                                  | 1.7                 | 14                     | 15                             | 15   | 15        | 15   | 15     | 15   | 61.6                                     | 56.3      | 61.6   |
|                          | 6/8/79                  | 1.0                                  | 1.5                 | 17                     | 15                             | 15   | 15        | 15   | 15     | 15   | 63.4                                     | 64.5      | 64.7   |
|                          | 8/6/79                  | 1.0                                  | 1.0                 | 16                     | 20                             | 20   | 20        | 20   | 20     | 20   | 58.7                                     | 58.6      | 58.6   |
| Little<br>Shallow        | 5/26/78                 | 1.0                                  | 1.6                 | --                     | 2.5                            | --   | --        | --   | 2.5    | ND   | ND                                       | --        | ND     |
|                          | 7/10/78                 | 1.5                                  | 1.5                 | 18                     | 25                             | --   | --        | --   | 30     | 25   | 41.8                                     | --        | 43.9   |
|                          | 8/20/78                 | 1.0                                  | 1.6                 | 17                     | 35                             | --   | --        | --   | 35     | 25   | 42.6                                     | --        | 42.9   |
|                          | 5/12/79                 | 1.5                                  | 1.7                 | 14                     | 15                             | 15   | 15        | 10   | 15     | 7.5  | 36.4                                     | 36.2      | 36.0   |
|                          | 6/13/79                 | 1.5                                  | 0.8                 | 16                     | 15                             | 15   | 20        | 15   | 20     | 20   | 40.7                                     | 40.8      | 41.0   |
|                          | 8/20/79                 | 1.0                                  | 0.7                 | 14                     | 20                             | 15   | 20        | 15   | 20     | 20   | 50.3                                     | 50.0      | 49.8   |
| Livingston<br>P.         | 6/24/78                 | 7.0                                  | 6.9                 | 12                     | 15                             | --   | --        | --   | 15     | 7.5  | 23.8                                     | ND        | 23.7   |
|                          | 7/20/78                 | 7.0                                  | 7.7                 | 8                      | 15                             | --   | --        | --   | 15     | 15   | 24.9                                     | ND        | 22.1   |
|                          | 8/17/78                 | 7.0                                  | 7.8                 | 10                     | 15                             | --   | --        | --   | 15     | 15   | 23.4                                     | ND        | 24.3   |
|                          | 5/18/79                 | 7.0                                  | 7.0                 | 12                     | 15                             | 15   | 15        | 15   | 15     | 15   | 25.4                                     | 25.9      | 25.4   |
|                          | 6/19/79                 | 7.0                                  | 7.2                 | 12                     | 15                             | 10   | 15        | 10   | 15     | 10   | 23.8                                     | 23.8      | 23.7   |
|                          | 8/9/79                  | 7.0                                  | 7.0                 | 8                      | 10                             | 5    | 5         | 2.5  | 10     | 10   | 22.8                                     | 23.2      | 24.1   |
| Long P.                  | 6/1/78                  | 5.5                                  | 4.8                 | --                     | 7.5                            | --   | --        | --   | 7.5    | 2.5  | 30.0                                     | --        | 30.6   |
|                          | 7/31/78                 | 6.0                                  | 6.6                 | 10                     | 15                             | --   | --        | --   | 20     | 15   | 25.7                                     | --        | 26.4   |
|                          | 6/4/79                  | 6.0                                  | 6.7                 | 15                     | 7.5                            | 7.5  | 10        | 10   | 10     | 10   | 29.1                                     | 29.1      | 29.1   |
|                          | 7/6/79                  | 6.0                                  | 6.5                 | 12                     | 15                             | 15   | 15        | 15   | 15     | 15   | 30.0                                     | 29.0      | 28.3   |
|                          | 8/30/79                 | 6.0                                  | 6.8                 | 10                     | 7.5                            | 7.5  | 7.5       | 7.5  | 7.5    | 7.5  | 27.1                                     | 27.1      | 27.0   |

| Lake           | Date<br>lake<br>sampled | Depth<br>of<br>integ.<br>sample<br>m | Secchi<br>disc<br>m | Forel-<br>Ule<br>color | Color<br>Platinum-Cobalt units |      |           |      |        |      | Conductivity<br>µS/cm at 25°C |      |      |        |
|----------------|-------------------------|--------------------------------------|---------------------|------------------------|--------------------------------|------|-----------|------|--------|------|-------------------------------|------|------|--------|
|                |                         |                                      |                     |                        | Surf.                          |      | Lake ave. |      | Integ. |      | Surf.                         | Lake | ave. | Integ. |
|                |                         |                                      |                     |                        | Appt.                          | True | Appt.     | True | Appt.  | True |                               |      |      |        |
| Mountain<br>P. | 5/21/78                 | 13.0                                 | 4.0                 | —                      | 0                              | —    | —         | —    | 7.5    | ND   | 14.8                          | —    | 14.7 |        |
|                | 6/13/78                 | 11.9                                 | 7.3                 |                        | 2.5                            | —    | —         | —    | 15     | 7.5  | 13.9                          | —    | 14.3 |        |
|                | 7/22/78                 | 8.5                                  | 4.2                 | 7                      | 7.5                            | —    | —         | —    | 15     | ND   | 14.4                          | —    | 14.0 |        |
|                | 8/18/78                 | 8.0                                  | 3.9                 | 7                      | 10                             | —    | —         | —    | 25     | 7.5  | 16.7                          | —    | 14.0 |        |
|                | 5/18/79                 | 12.0                                 | 4.2                 | 8                      | 15                             | 10   | 25        | 20   | 25     | 15   | 13.9                          | 13.5 | 14.6 |        |
|                | 6/5/79                  | 13.0                                 | 4.0                 | 6                      | 2.5                            | 2.5  | 2.5       | 2.5  | 7.5    | 7.5  | 12.5                          | 13.2 | 14.2 |        |
|                | 8/22/79                 | 12.0                                 | 3.7                 | 6                      | 7.5                            | 5    | 10        | 2.5  | 25     | 7.5  | 15.7                          | 15.1 | 12.6 |        |
| Nicks P.       | 5/31/78                 | 5.5                                  | 4.0                 | —                      | 15                             | —    | —         | —    | 15     | ND   | 24.4                          | —    | 24.1 |        |
|                | 7/8/78                  | 6.0                                  | 5.4                 | 12                     | 15                             | —    | —         | —    | 15     | 7.5  | 19.4                          | —    | 19.2 |        |
|                | 7/17/78                 | 5.5                                  | 5.1                 | 16                     | 25                             | —    | —         | —    | 35     | 15   | 20.8                          | —    | 19.7 |        |
|                | 8/14/78                 | 4.0                                  | 4.8                 | 16                     | 30                             | —    | —         | —    | 35     | 20   | 19.8                          | —    | 20.4 |        |
|                | 5/18/79                 | 5.0                                  | 4.8                 | 15                     | ND                             | 15   | 20        | 15   | 25     | ND   | 21.5                          | 22.1 | 21.2 |        |
|                | 6/22/79                 | 5.0                                  | 6.1                 | 12                     | 15                             | 15   | 15        | 15   | 15     | 15   | 20.1                          | 19.2 | 19.1 |        |
|                | 8/22/79                 | 5.0                                  | 6.0                 | 14                     | 20                             | 15   | 20        | 15   | 20     | 15   | 18.6                          | 18.6 | 18.6 |        |
| Parch P.       | 6/27/78                 | 10.5                                 | 5.3                 | 14                     | 15                             | —    | —         | —    | 25     | 15   | 20.8                          | —    | 21.2 |        |
|                | 8/6/78                  | 9.0                                  | 7.0                 | 12                     | 15                             | —    | —         | —    | 20     | 15   | 20.8                          | —    | 21.6 |        |
|                | 5/6/79                  | 11.0                                 | 5.0                 | 15                     | 15                             | 15   | 15        | 15   | 15     | 15   | 18.5                          | 19.8 | 19.2 |        |
|                | 6/7/79                  | 10.0                                 | 6.2                 | 14                     | 7.5                            | 7.5  | 15        | 5    | 15     | 7.5  | 21.8                          | 22.6 | 23.6 |        |
|                | 8/8/79                  | 11.0                                 | 6.6                 | 10                     | 10                             | 10   | 20        | 10   | 40     | 20   | 21.5                          | 22.2 | 24.2 |        |
| Pine P.        | 5/22/78                 | 16.5                                 | 6.5                 | —                      | 2.5                            | —    | —         | —    | 2.5    | ND   | 27.0                          | —    | 29.4 |        |
|                | 6/17/78                 | 11.0                                 | 5.5                 | —                      | 7.5                            | —    | —         | —    | 7.5    | 5    | 27.9                          | —    | 32.1 |        |
|                | 8/4/78                  | 16.0                                 | 9.5                 | 8                      | 7.5                            | —    | —         | —    | 7.5    | 7.5  | 27.0                          | —    | 28.1 |        |
|                | 5/9/79                  | 16.0                                 | 8.5                 | 7                      | 10                             | 10   | 10        | 10   | 10     | 10   | 24.2                          | 24.9 | 24.9 |        |
|                | 6/8/79                  | 14.0                                 | 7.0                 | 6                      | 7.5                            | 7.5  | 7.5       | 7.5  | 7.5    | 7.5  | 27.6                          | 27.6 | 27.4 |        |
|                | 8/6/79                  | 16.0                                 | 7.8                 | 8                      | 5                              | 0    | 5         | 2.5  | 10     | 2.5  | 32.3                          | 24.9 | 25.0 |        |

| Lake                    | Date<br>lake<br>sampled | Depth<br>of<br>integ.<br>sample<br>m | Secchi<br>disc<br>m | Forel-<br>Ule<br>color | Color<br>Platinum-Cobalt units |      |           |      |        |      | Conductivity<br>$\mu\text{S/cm at } 25^\circ\text{C}$ |           |        |
|-------------------------|-------------------------|--------------------------------------|---------------------|------------------------|--------------------------------|------|-----------|------|--------|------|-------------------------------------------------------|-----------|--------|
|                         |                         |                                      |                     |                        | Surf.                          |      | Lake ave. |      | Integ. |      | Surf.                                                 | Lake ave. | Integ. |
|                         |                         |                                      |                     |                        | Appt.                          | True | Appt.     | True | Appt.  | True |                                                       |           |        |
| Rock P.                 | 5/11/78                 | 9.0                                  | 4.6                 | --                     | 25                             | --   | --        | --   | 45     | ND   | 38.4                                                  | --        | 43.6   |
|                         | 6/14/78                 | 9.2                                  | 4.9                 | 17                     | 35                             | --   | --        | --   | 45     | 35   | 38.2                                                  | --        | 35.8   |
|                         | 7/16/78                 | 9.0                                  | 4.5                 | 18                     | 35                             | --   | --        | --   | 40     | 35   | 35.4                                                  | --        | 37.4   |
|                         | 8/3/78                  | 7.5                                  | 3.7                 | 17                     | 35                             | --   | --        | --   | ND     | 30   | 36.6                                                  | --        | 35.5   |
|                         | 5/4/79                  | 9.0                                  | 5.3                 | 17                     | 35                             | 30   | 35        | 30   | 35     | 30   | 30.3                                                  | 34.5      | 38.6   |
|                         | 6/5/79                  | 10.0                                 | 5.2                 | 20                     | 25                             | 15   | 25        | 25   | 30     | 25   | 35.4                                                  | 35.7      | 37.3   |
|                         | 8/5/79                  | 9.0                                  | 4.2                 | 18                     | 20                             | 20   | 30        | 25   | 40     | 30   | 33.3                                                  | 32.7      | 34.6   |
| Round P.                | 5/10/78                 | 9.5                                  | 7.3                 | --                     | 5                              | --   | --        | --   | 5      | ND   | 17.7                                                  | --        | 21.5   |
|                         | 6/6/78                  | 10.0                                 | 5.6                 | --                     | 0                              | --   | --        | --   | 0      | 0    | 30.6                                                  | --        | 29.1   |
|                         | 7/19/78                 | 10.0                                 | 6.8                 | 10                     | 15                             | --   | --        | --   | 20     | 10   | 21.5                                                  | --        | 23.0   |
|                         | 8/16/78                 | 9.5                                  | 6.0                 | 12                     | 15                             | --   | --        | --   | 20     | 7.5  | 22.7                                                  | --        | 24.4   |
|                         | 5/17/79                 | 9.0                                  | 4.9                 | 13                     | 15                             | 15   | 7.5       | 5    | 5      | 2.5  | 21.1                                                  | 21.2      | 21.3   |
|                         | 6/18/79                 | 9.0                                  | 6.5                 | 10                     | 10                             | 10   | 15        | 15   | 15     | 15   | 20.7                                                  | 21.3      | 21.3   |
|                         | 8/13/79                 | 10.0                                 | 5.4                 | 14                     | 15                             | 10   | 15        | 10   | 25     | 20   | 22.4                                                  | 22.2      | 23.1   |
| Upper<br>Wallface<br>P. | 6/10/78                 | 8.0                                  | 4.5                 | --                     | 15                             | --   | --        | --   | 25     | 15   | 21.3                                                  | --        | 22.8   |
|                         | 7/18/78                 | 7.0                                  | 6.3                 | 7.0                    | 7.5                            | --   | --        | --   | 15     | 7.5  | 19.4                                                  | --        | 18.5   |
|                         | 8/15/78                 | 8.0                                  | 8.6                 | 8.0                    | 7.5                            | --   | --        | --   | 15     | 7.5  | 21.2                                                  | --        | 21.3   |
|                         | 5/15/79                 | 8.0                                  | 6.1                 | 16                     | 30                             | 25   | 25        | 35   | 35     | 25   | 19.8                                                  | 20.6      | 21.0   |
|                         | 6/17/79                 | 8.0                                  | 4.7                 | 14                     | 15                             | 15   | 25        | 15   | 25     | 15   | 18.9                                                  | 19.6      | 19.6   |
|                         | 8/12/79                 | 7.0                                  | 7.5                 | 7                      | 10                             | 10   | 10        | 5    | 10     | 10   | 20.2                                                  | 19.8      | 19.9   |
| Washbowl<br>P.          | 5/26/78                 | 1.5                                  | 1.8                 | --                     | 70                             | --   | --        | --   | 70     | ND   | ND                                                    | --        | ND     |
|                         | 7/10/78                 | 2.0                                  | 1.3                 | 21                     | 200                            | --   | --        | --   | 190    | 90   | 21.4                                                  | --        | 25.9   |
|                         | 8/20/78                 | 1.0                                  | 1.5                 | 21+                    | 100                            | --   | --        | --   | 100    | 100  | 29.7                                                  | --        | 31.1   |
|                         | 5/12/79                 | 1.6                                  | 1.0                 | 21+                    | 80                             | 35   | 130       | 80   | 150    | 100  | 23.3                                                  | 22.3      | 22.8   |
|                         | 6/13/79                 | 1.0                                  | 1.1                 | 21+                    | 140                            | 90   | 90        | 45   | 90     | 45   | 23.0                                                  | 23.5      | 23.5   |
|                         | 8/20/79                 | 1.3                                  | 0.9                 | 21+                    | 100                            | 40   | 100       | 50   | 95     | 55   | 22.4                                                  | 22.2      | 23.1   |



| Lake                  | Date<br>lake<br>sampled | Depth<br>of<br>integ.<br>sample<br>m | Secchi<br>disc<br>m | Forel-<br>Ule<br>color | Color                 |      |           |      |        |      | Conductivity<br>μS/cm at 25°C |           |        |
|-----------------------|-------------------------|--------------------------------------|---------------------|------------------------|-----------------------|------|-----------|------|--------|------|-------------------------------|-----------|--------|
|                       |                         |                                      |                     |                        | Platinum-Cobalt units |      |           |      |        |      | Surf.                         | Lake ave. | Integ. |
|                       |                         |                                      |                     |                        | Surf.                 |      | Lake ave. |      | Integ. |      |                               |           |        |
|                       |                         |                                      |                     |                        | Appt.                 | True | Appt.     | True | Appt.  | True | Surf.                         | Lake ave. | Integ. |
| Copperas P.<br>(W.N.) | 5/11/78                 | 16.0                                 | 6.0                 | --                     | 2.5                   | --   | --        | --   | 7.5    | ND   | 34.0                          | --        | 33.9   |
|                       | 6/14/78                 | 13.0                                 | 7.0                 | --                     | 7.5                   | --   | --        | --   | 15     | 7.5  | 34.2                          | --        | 35.8   |
|                       | 7/13/78                 | 13.0                                 | 6.1                 | 12                     | 7.5                   | --   | --        | --   | 2.5    | 2.5  | 32.8                          | --        | 34.4   |
|                       | 8/8/78                  | 12.0                                 | 5.7                 | 12                     | 25                    | --   | --        | --   | 25     | 15   | 34.3                          | --        | 35.9   |
|                       | 5/10/79                 | 16.0                                 | 4.7                 | 13                     | 10                    | 7.5  | 10        | 7.5  | 10     | 7.5  | 32.5                          | 33.8      | 35.8   |
|                       | 6/6/79                  | 16.0                                 | 8.4                 | 12                     | 5                     | 5    | 15        | 10   | 15     | 10   | 31.2                          | 33.4      | 37.1   |
|                       | 8/5/79                  | 16.0                                 | 5.7                 | 12                     | 10                    | 10   | 15        | 10   | 15     | 10   | 30.2                          | 36.8      | 33.7   |
| Cowhorn P.            | 5/25/78                 | 12.5                                 | 3.9                 | --                     | 2.5                   | --   | --        | --   | 7.5    | ND   | ND                            | --        | ND     |
|                       | 7/9/78                  | 6.0                                  | 2.8                 | 19                     | 25                    | --   | --        | --   | 30     | 25   | 22.4                          | --        | 23.1   |
|                       | 8/19/78                 | 7.0                                  | 3.5                 | 14                     | 35                    | --   | --        | --   | 45     | 35   | 21.3                          | --        | 23.1   |
|                       | 5/11/79                 | 13.0                                 | 3.9                 | 17                     | 25                    | 15   | 30        | 25   | 15     | 7.5  | 21.9                          | 23.9      | 23.4   |
|                       | 6/11/79                 | 12.0                                 | 3.7                 | 19                     | 25                    | 15   | 25        | 20   | 20     | 20   | 20.7                          | 21.8      | 21.8   |
|                       | 8/17/79                 | 13.0                                 | 3.2                 | 17                     | 35                    | 25   | 40        | 35   | 45     | 40   | 24.5                          | 25.8      | 30.7   |
|                       | Crane Mt. P.            | 5/18/78                              | 6.0                 | ND                     | --                    | 7.5  | --        | --   | --     | 7.5  | ND                            | 24.2      | --     |
| 6/16/78               |                         | 6.0                                  | 4.2                 | --                     | 7.5                   | --   | --        | --   | 15     | 5    | 28.3                          | --        | 25.9   |
| 8/1/78                |                         | 5.0                                  | 3.8                 | 15                     | 15                    | --   | --        | --   | 20     | 10   | 24.3                          | --        | 25.4   |
| 5/7/79                |                         | 5.0                                  | 3.3                 | 12                     | 15                    | 15   | 20        | 15   | 20     | 20   | 23.0                          | 23.5      | 23.2   |
| 6/12/79               |                         | 5.0                                  | 4.3                 | 14                     | 7.5                   | 7.5  | 15        | 15   | 15     | 7.5  | 23.7                          | 24.2      | 24.2   |
| 8/16/79               |                         | 5.5                                  | 4.7                 | 14                     | 10                    | 10   | 20        | 10   | 20     | 15   | 28.6                          | 28.6      | 30.1   |
| Deep L.               | 5/27/78                 | 17.0                                 | ND                  | ND                     | 15                    | --   | --        | --   | 7.5    | ND   | ND                            | --        | ND     |
|                       | 6/28/78                 | 13.0                                 | 7.6                 | 10                     | 15                    | --   | --        | --   | 15     | ND   | 32.7                          | --        | 26.4   |
|                       | 8/7/78                  | 16.0                                 | 9.0                 | 6                      | 7.5                   | --   | --        | --   | 7.5    | 7.5  | 25.4                          | --        | 27.3   |
|                       | 5/31/79                 | 16.0                                 | 7.2                 | 7                      | 15                    | 15   | 10        | 7.5  | 15     | 7.5  | 25.4                          | 29.7      | 26.8   |
|                       | 6/24/79                 | 16.0                                 | 7.7                 | 7                      | 7.5                   | 5    | 15        | 15   | 15     | 7.5  | 30.1                          | 27.9      | 28.7   |
|                       | 9/1/79                  | 16.0                                 | 10.7                | 5                      | 7.5                   | 2.5  | 7.5       | 2.5  | 5      | 2.5  | 30.9                          | 29.9      | 28.8   |

| Lake        | Date<br>lake<br>sampled | Depth<br>of<br>integ.<br>sample<br>m | Secchi<br>disc<br>m | Forel-<br>Ule<br>color | Color                 |      |           |      |        |      | Conductivity<br>µS/cm at 25°C |           |        |  |
|-------------|-------------------------|--------------------------------------|---------------------|------------------------|-----------------------|------|-----------|------|--------|------|-------------------------------|-----------|--------|--|
|             |                         |                                      |                     |                        | Platinum-Cobalt units |      |           |      |        |      |                               |           |        |  |
|             |                         |                                      |                     |                        | Surf.                 |      | Lake ave. |      | Integ. |      |                               |           |        |  |
|             |                         |                                      |                     |                        | Appt.                 | True | Appt.     | True | Appt.  | True | Surf.                         | Lake ave. | Integ. |  |
| Wolf L.     | 5/30/78                 | 12.5                                 | 8.0                 | —                      | ND                    | —    | —         | —    | ND     | ND   | 30.0                          | —         | 29.1   |  |
|             | 6/29/78                 | 11.0                                 | 6.7                 | 12                     | ND                    | —    | —         | —    | ND     | ND   | 29.1                          | —         | 29.0   |  |
|             | 7/24/78                 | 10.5                                 | 7.4                 | 12                     | 15                    | —    | —         | —    | 15     | 25   | 30.5                          | —         | 30.6   |  |
|             | 8/13/78                 | 11.0                                 | 8.0                 | 10                     | 10                    | —    | —         | —    | 20     | 15   | 30.1                          | —         | 30.7   |  |
|             | 5/28/79                 | 12.0                                 | 7.0                 | 12                     | 10                    | 7.5  | 10        | 10   | 10     | 10   | 30.4                          | 30.4      | 30.4   |  |
|             | 6/20/79                 | 11.0                                 | 9.8                 | 12                     | 15                    | 15   | 15        | 15   | 15     | 15   | 29.1                          | 29.1      | 29.1   |  |
|             | 8/25/79                 | 12.0                                 | 8.4                 | 9                      | 2.5                   | 2.5  | 2.5       | 2.5  | 2.5    | 2.5  | 31.4                          | 31.4      | 31.8   |  |
|             |                         |                                      |                     |                        |                       |      |           |      |        |      |                               |           |        |  |
| Bass L.     | 5/21/78                 | 5.5                                  | 3.5                 | —                      | 25                    |      |           |      | 35     | ND   | 13.2                          |           | 16.1   |  |
|             | 6/13/78                 | 6.0                                  | 3.0                 | —                      | 25                    |      |           |      | 70     | 45   | 15.6                          |           | 16.5   |  |
|             | 8/18/78                 | 5.0                                  | 4.5                 | 19                     | 25                    |      |           |      | 40     | 25   | 16.6                          |           | 16.4   |  |
| Blue Mt. L. | 5/29/78                 | 26.0                                 | 8.0                 | —                      | 2.5                   |      |           |      | 2.5    | ND   | ND                            |           | 39.1   |  |
|             | 6/26/78                 | 8.0                                  | 7.5                 | 10                     | 7.5                   |      |           |      | 7.5    | 7.5  | 36.9                          |           | 37.4   |  |
|             | 7/28/78                 | 16.0                                 | 8.8                 | 10                     | 7.5                   |      |           |      | 15     | 15   | 37.4                          |           | 38.3   |  |
| Brandy P.   | 5/7/78                  | 2.0                                  | 1.4                 | —                      | ND                    |      |           |      | 110    | ND   | ND                            |           | 40.6   |  |
|             | 6/9/78                  | 1.5                                  | 0.9                 | —                      | 160                   |      |           |      | 180    | 180  | 64.6                          |           | 68.7   |  |
|             | 7/16/78                 | 2.0                                  | 0.8                 | 21+                    | 200                   |      |           |      | 250    | 225  | 64.7                          |           | 66.5   |  |
|             | 8/3/78                  | 2.4                                  | 0.8                 | 21+                    | 220                   |      |           |      | 250    | 200  | 57.0                          |           | 62.2   |  |
| Brant L.    | 5/9/78                  | 16.0                                 | 4.6                 | —                      | 20                    |      |           |      | 10     | ND   | 64.6                          |           | 65.3   |  |
|             | 6/12/78                 | 13.0                                 | 6.7                 | 12                     | 15                    |      |           |      | 15     | 10   | 63.9                          |           | 64.7   |  |
|             | 8/2/78                  | 12.0                                 | 7.0                 | 12                     | 15                    |      |           |      | 15     | 15   | 68.6                          |           | 68.6   |  |
