# Supplementary material
Source: publisher figshare collection journal article supplement (https://wiley.figshare.com/articles/dataset/_/3521588)
Supplement: Supplementary file 5 [file 1]

Table 10. Diatom taxa observed in surface sediment samples taken from deepest part of 38 Adirondack lakes, their frequency of occurrence and pH preference categories<sup>1</sup>, and average<sup>2</sup> and ranges of pH, alkalinity, total phosphorus, and chlorophyll a for lakes in which they occurred. Averages are weighted by percentage of each count made up by the taxon. Bog lakes were excluded in determination of average and range of total phosphorus and chlorophyll a concentrations<sup>3</sup>.

| Taxon                                                             | No. of lakes in which taxon was observed | % of grand total of all counts | pH pref. categ. | pH Geometric mean |         | Alkalinity $\mu\text{eq/L}$ |            | Total phosphorus $\mu\text{g/L}$ |           | Chlorophyll <u>a</u> $\mu\text{g/L}$ |         |
|-------------------------------------------------------------------|------------------------------------------|--------------------------------|-----------------|-------------------|---------|-----------------------------|------------|----------------------------------|-----------|--------------------------------------|---------|
|                                                                   |                                          |                                |                 | Ave.              | Range   | Ave.                        | Range      | Ave.                             | Range     | Ave.                                 | Range   |
| <u>Achnanthes clevei</u> Grun.                                    | 2                                        | .012                           | ALKF            | 7.4               | 7.0-7.8 | 222                         | 77 to 366  | 10.1                             | 7.0-13.2  | 4.4                                  | 2.2-6.6 |
| <u>A. didyma</u> Hust.                                            | 5                                        | .062                           | ACF             | 7.1               | 6.8-7.3 | 111                         | 77 to 154  | 9.0                              | 4.2-18.1  | 3.3                                  | 1.5-7.7 |
| <u>A. exigua</u> var. <u>heterovalva</u> Krasske                  | 6                                        | .087                           | ALKF            | 7.6               | 7.2-7.8 | 320                         | 129 to 408 | 11.1                             | 7.3-18.1  | 3.4                                  | 1.8-7.7 |
| <u>A. lanceolata</u> (Bréb.) Grun.                                | 4                                        | .155                           | ALKF            | 7.3               | 6.8-7.3 | 174                         | 62 to 250  | 16.5                             | 7.2-18.1  | 6.8                                  | 1.8-7.7 |
| <u>A. lanceolata</u> var. <u>dubia</u> Grun.                      | 5                                        | .056                           | ALKF            | 7.5               | 6.8-7.8 | 291                         | 62 to 408  | 11.1                             | 7.2-18.1  | 4.3                                  | 1.8-7.7 |
| <u>A. lanceolata</u> var. <u>haynaldii</u> (Istv.-Schaarsch.) Cl. | 2                                        | .019                           | ALKF            | 7.4               | 7.3-7.5 | 190                         | 158 to 253 | 11.1                             | 10.0-13.4 | 2.0                                  | 1.8-2.2 |
| <u>A. cf. laterostrata</u> Hust.                                  | 3                                        | .037                           | IND             | 7.3               | 7.3-7.5 | 187                         | 154 to 253 | 17.2                             | 13.4-18.1 | 6.5                                  | 1.8-7.7 |
| <u>A. levanderi</u> Hust.                                         | 7                                        | .267                           | IND             | 7.0               | 6.4-7.3 | 96                          | 27 to 350  | 7.6                              | 2.4-14.8  | 2.4                                  | 0.6-6.8 |
| <u>A. linearis</u> (W. Sm.) Grun.                                 | 8                                        | .217                           | IND             | 7.4               | 5.7-7.8 | 225                         | 20 to 408  | 10.8                             | 4.6-18.1  | 2.9                                  | 0.9-7.7 |

| Taxon                                         | No. of lakes in which taxon was observed | % of grand total of all counts | pH pref. categ. | pH Geometric mean |         | Alkalinity $\mu\text{eq/L}$ |            | Total phosphorus $\mu\text{g/L}$ |           | Chlorophyll <u>a</u> $\mu\text{g/L}$ |         |
|-----------------------------------------------|------------------------------------------|--------------------------------|-----------------|-------------------|---------|-----------------------------|------------|----------------------------------|-----------|--------------------------------------|---------|
|                                               |                                          |                                |                 | Ave.              | Range   | Ave.                        | Range      | Ave.                             | Range     | Ave.                                 | Range   |
| <u>A. linearis</u> f. <u>curta</u> H.L. Sm.   | 6                                        | .149                           |                 | 7.2               | 6.8-7.5 | 151                         | 62 to 253  | 10.2                             | 7.2-13.4  | 2.6                                  | 1.8-3.9 |
| <u>A. marginulata</u> Grun.                   | 23                                       | 1.553                          | ACF             | 5.4               | 4.6-7.3 | 14                          | ~31 to 250 | 4.5                              | 2.4-10.1  | 1.1                                  | 0.3-3.9 |
| <u>A. microcephala</u> (Kütz.) Grun.          | 2                                        | .050                           | IND             | 7.3               | 7.3-7.3 | 157                         | 154 to 158 | 13.1                             | 10.0-18.1 | 4.3                                  | 2.2-7.7 |
| <u>A. minutissima</u> Kütz.                   | 20                                       | 1.168                          | IND             | 7.2               | 5.5-7.8 | 160                         | 4 to 408   | 9.0                              | 2.4-14.8  | 2.3                                  | 0.3-6.8 |
| <u>A. suchlandti</u> Hust.                    | 4                                        | .043                           | IND             | 7.2               | 7.0-7.3 | 153                         | 77 to 250  | 14.7                             | 7.0-18.1  | 6.0                                  | 2.2-7.7 |
| <u>A. spp.</u>                                | 18                                       | .696                           |                 | 6.8               | 4.7-7.8 | 108                         | ~16 to 392 | 10.0                             | 3.4-21.6  | 3.1                                  | 0.3-8.4 |
| <u>Actinella punctata</u> Lewis               | 11                                       | .162                           | ACB             | 5.1               | 4.6-6.8 | ~1                          | ~31 to 79  | 4.8                              | 2.7-13.9  | 1.8                                  | 0.4-6.0 |
| <u>Amphipleura pellucida</u> Kütz.            | 1                                        | .006                           | ALKF            | 7.8               | 7.8-7.8 | 366                         | 366 to 366 | 13.2                             | 13.2-13.2 | 6.6                                  | 6.6-6.6 |
| <u>Amphora ovalis</u> (Kütz.) Kütz.           | 1                                        | .006                           | ALKF            | 7.3               | 7.3-7.3 | 158                         | 158 to 158 | 10.0                             | 10.0-10.0 | 2.2                                  | 2.2-2.2 |
| <u>A. ovalis</u> var. <u>affinis</u> (Kütz.)  | 3                                        | .019                           | ALKF            | 7.3               | 7.2-7.5 | 176                         | 118 to 253 | 9.2                              | 4.2-13.4  | 1.8                                  | 1.5-2.2 |
| V.H. <u>ex</u> DeT.                           |                                          |                                |                 |                   |         |                             |            |                                  |           |                                      |         |
| <u>Anomoeoneis follis</u> (Ehr.) Cl.          | 1                                        | .006                           | IND             | 6.2               | 6.2-6.2 | 11                          | 11 to 11   | 8.7                              | 8.7-8.7   | 2.5                                  | 2.5-2.5 |
| <u>A. seriens</u> (Bréb. <u>ex</u> Kütz.) Cl. | 5                                        | .068                           | ACB             | 4.9               | 4.7-5.5 | ~10                         | ~18 to 4   | 3.6                              | 2.7-4.2   | 1.4                                  | 0.3-3.0 |
| <u>A. seriens</u> var. <u>brachysira</u>      | 28                                       | 1.131                          | ACF             | 5.9               | 4.6-7.8 | 29                          | ~31 to 208 | 6.4                              | 2.4-18.1  | 2.0                                  | 0.3-7.7 |
| (Breb. <u>ex</u> Kütz.) Hust.                 |                                          |                                |                 |                   |         |                             |            |                                  |           |                                      |         |

| Taxon                                                               | No. of lakes in which taxon was observed | % of grand total of all counts | pH pref. categ. | pH Geometric mean |         | Alkalinity $\mu\text{eq/L}$ |            | Total phosphorus $\mu\text{g/L}$ |           | Chlorophyll <u>a</u> $\mu\text{g/L}$ |         |
|---------------------------------------------------------------------|------------------------------------------|--------------------------------|-----------------|-------------------|---------|-----------------------------|------------|----------------------------------|-----------|--------------------------------------|---------|
|                                                                     |                                          |                                |                 | Ave.              | Range   | Ave.                        | Range      | Ave.                             | Range     | Ave.                                 | Range   |
| <u>A. vitrea</u> (Grun.) Ross                                       | 22                                       | .571                           | IND             | 6.9               | 5.2-7.8 | 112                         | 0 to 408   | 8.8                              | 2.4-18.1  | 2.4                                  | 0.3-7.7 |
| <u>Asterionella formosa</u> Hass.                                   | 15                                       | 2.149                          | ALKF            | 7.4               | 6.4-7.8 | 238                         | 27 to 408  | 10.4                             | 2.4-18.1  | 4.3                                  | 0.6-7.7 |
| <u>A. ralfsii</u> var. <u>americana</u><br>Korn.                    | 11                                       | 5.609                          | ACF             | 5.1               | 4.5-7.3 | -5                          | -26 to 154 | 6.7                              | 3.1-21.6  | 2.1                                  | 1.1-8.4 |
| <u>Caloneis ventricosa</u> var.<br><u>truncatula</u> (Grun.) Meist. | 2                                        | .019                           | ALKF            | 6.9               | 6.8-7.0 | 66                          | 62 to 69   | 6.6                              | 6.3-7.2   | 1.6                                  | 1.5-1.8 |
| <u>C. sp.</u>                                                       | 1                                        | .006                           |                 | 7.5               | 7.5-7.5 | 253                         | 253 to 253 | 13.4                             | 13.4-13.4 | 1.8                                  | 1.8-1.8 |
| <u>Cocconeis placentula</u> var.<br><u>lineata</u> (Ehr.) V.H.      | 4                                        | .025                           | ALKF            | 6.9               | 4.7-7.8 | 252                         | -18 to 408 | 9.3                              | 3.1-13.4  | 3.3                                  | 1.6-6.6 |
| <u>Coscinodiscus sp.</u> , <u>cf.</u>                               | 2                                        | .019                           |                 | 6.6               | 6.4-6.8 | 62                          | 27 to 79   | 5.6                              | 2.4-7.2   | 1.7                                  | 0.6-2.3 |
| <u>Cyclotella compta</u> (Ehr.)<br>Kütz.                            | 18                                       | 2.211                          | ALKF            | 7.2               | 6.0-7.8 | 165                         | 23 to 408  | 9.6                              | 2.4-18.1  | 3.8                                  | 0.6-7.7 |
| <u>C. kuetzingiana</u> var. <u>radiosa</u><br>Fricke                | 3                                        | .130                           | IND             | 7.3               | 7.2-7.3 | 146                         | 118 to 154 | 15.0                             | 4.2-18.1  | 6.3                                  | 1.5-7.7 |
| <u>C. michiganiana</u> Skv.                                         | 8                                        | 1.006                          |                 | 7.6               | 6.0-7.8 | 353                         | 23 to 408  | 9.2                              | 4.2-18.1  | 3.6                                  | 1.5-7.7 |
| <u>C. stelligera</u> Cl. <u>et</u> Grun.                            | 24                                       | 12.367                         | IND             | 6.8               | 5.1-7.8 | 84                          | -5 to 408  | 7.2                              | 2.4-18.1  | 2.3                                  | 0.6-7.7 |

| Taxon                                                 | No. of lakes in which taxon was observed | % of grand total of all counts | pH pref. categ. | pH Geometric mean |         | Alkalinity $\mu\text{eq/L}$ |            | Total phosphorus $\mu\text{g/L}$ |          | Chlorophyll $a$ $\mu\text{g/L}$ |         |
|-------------------------------------------------------|------------------------------------------|--------------------------------|-----------------|-------------------|---------|-----------------------------|------------|----------------------------------|----------|---------------------------------|---------|
|                                                       |                                          |                                |                 | Ave.              | Range   | Ave.                        | Range      | Ave.                             | Range    | Ave.                            | Range   |
| <u>Cymbella amphicephala</u> Naeg.<br><u>ex</u> Kütz. | 5                                        | .056                           | IND             | 6.5               | 4.6-7.2 | 74                          | -31 to 126 | 6.4                              | 3.5-8.9  | 1.9                             | 0.4-3.2 |
| <u>C. angustata</u> (W. Sm.) Cl.                      | 6                                        | .087                           | IND             | 6.4               | 4.9-7.7 | 138                         | -2 to 392  | 7.5                              | 3.1-14.8 | 2.1                             | 0.8-6.8 |
| <u>C. cesatii</u> (Rabh.) Grun.<br><u>ex</u> A.S.     | 6                                        | .162                           | IND             | 7.1               | 5.7-7.7 | 162                         | 20 to 392  | 8.7                              | 4.6-11.6 | 2.2                             | 0.9-2.9 |
| <u>C. cistula</u> (Ehr.) Kirchn.                      | 3                                        | .019                           | ALKF            | 7.6               | 7.2-7.8 | 294                         | 126 to 392 | 11.2                             | 8.9-13.2 | 3.9                             | 2.1-6.6 |
| <u>C. cuspidata</u> Kütz.                             | 5                                        | .037                           | IND             | 6.7               | 5.7-7.5 | 84                          | 20 to 253  | 7.4                              | 2.4-13.4 | 1.4                             | 0.6-3.3 |
| <u>C. gaeumannii</u> Meist.                           | 10                                       | .329                           | ACF             | 5.3               | 4.6-7.0 | 4                           | -31 to 77  | 4.8                              | 2.7-13.9 | 1.5                             | 0.3-6.0 |
| <u>C. hebridica</u> Grun. <u>ex</u> Cl.               | 13                                       | .907                           | ACF             | 5.1               | 4.6-7.0 | -3                          | -31 to 77  | 3.6                              | 2.7-7.0  | 1.9                             | 0.3-3.2 |
| <u>C. lunata</u> W. Sm.                               | 17                                       | .379                           | IND             | 6.5               | 4.9-7.8 | 62                          | -5 to 366  | 7.7                              | 4.4-18.1 | 2.4                             | 0.8-7.7 |
| <u>C. microcephala</u> Grun.                          | 14                                       | .280                           | ALKF            | 7.2               | 5.7-7.8 | 176                         | 20 to 408  | 10.7                             | 4.6-18.1 | 3.1                             | 0.8-7.7 |
| <u>C. minuta</u> Hilse <u>ex</u> Rabh.                | 11                                       | .205                           | IND             | 6.7               | 4.9-7.7 | 119                         | -5 to 392  | 7.7                              | 4.2-13.9 | 2.2                             | 0.8-6.0 |
| <u>C. naviculiformis</u> Auersw.<br><u>ex</u> Heib.   | 2                                        | .031                           | IND             | 7.1               | 6.8-7.2 | 100                         | 62 to 126  | 8.2                              | 7.2-8.9  | 2.4                             | 1.8-2.9 |
| <u>C. spp.</u>                                        | 13                                       | .180                           |                 | 5.9               | 4.6-7.7 | 72                          | -31 to 392 | 7.4                              | 2.4-21.6 | 2.2                             | 0.3-8.4 |

| Taxon                                                               | No. of<br>lakes<br>in which<br>taxon<br>was ob-<br>served | % of<br>grand<br>total<br>of<br>all<br>counts | pH<br>pref.<br>categ. | pH<br>Geometric<br>mean |         | Alkalinity<br>µeq/L |             | Total<br>phosphorus<br>µg/L |           | Chlorophyll <u>a</u><br>µg/L |         |
|---------------------------------------------------------------------|-----------------------------------------------------------|-----------------------------------------------|-----------------------|-------------------------|---------|---------------------|-------------|-----------------------------|-----------|------------------------------|---------|
|                                                                     |                                                           |                                               |                       | Ave.                    | Range   | Ave.                | Range       | Ave.                        | Range     | Ave.                         | Range   |
| <u>Diatoma anceps</u> (Ehr.) Kirchn.                                | 2                                                         | .019                                          | IND                   | 6.9                     | 6.4-7.2 | 93                  | 27 to 126   | 6.7                         | 2.4-8.9   | 2.1                          | 0.6-2.9 |
| <u>D. hiemale</u> var. <u>mesodon</u><br>Ehr. Grun.                 | 3                                                         | .037                                          | ALKF                  | 7.3                     | 7.2-7.5 | 152                 | 126 to 253  | 9.8                         | 8.9-13.4  | 2.6                          | 1.8-2.9 |
| <u>D. spp.</u>                                                      | 1                                                         | .006                                          |                       | 7.5                     | 7.5-7.5 | 253                 | 253 to 253  | 13.4                        | 13.4-13.4 | 1.8                          | 1.8-1.8 |
| <u>Diploneis elliptica</u> (Kütz.)<br>Cl.                           | 3                                                         | .019                                          | ALKF                  | 7.2                     | 7.1-7.3 | 140                 | 126 to 158  | 9.7                         | 8.9-10.1  | 2.8                          | 2.2-3.3 |
| <u>D. oblongella</u> (Naeg. <u>ex</u><br>Kütz.) Ross                | 1                                                         | .012                                          | ALKF                  | 7.2                     | 7.2-7.2 | 118                 | 118 to 118  | 4.2                         | 4.2-4.2   | 1.5                          | 1.5-1.5 |
| <u>D. cf. oculata</u> (Breb.) Cl.                                   | 2                                                         | .019                                          | IND                   | 7.4                     | 7.0-7.5 | 189                 | 59 to 253   | 10.4                        | 4.6-13.4  | 1.4                          | 0.8-1.8 |
| <u>Epithemia argus</u> <u>cf.</u> var.<br><u>protracta</u> A. Mayer | 1                                                         | .006                                          |                       | 7.8                     | 7.8-7.8 | 366                 | 366 to 366  | 13.2                        | 13.2-13.2 | 6.6                          | 6.6-6.6 |
| <u>Eunotia arcus</u> Ehr.                                           | 3                                                         | .043                                          | IND                   | 5.4                     | 4.8-6.6 | 7                   | ~13 to 40   | 4.2                         | 3.1-5.8   | 1.6                          | 0.9-2.9 |
| <u>E. bactriana</u> Ehr.                                            | 4                                                         | .056                                          | ACF                   | 5.0                     | 4.8-5.2 | ~5                  | ~13 to 0    | 4.1                         | 3.1-5.8   | 1.3                          | 0.9-3.2 |
| <u>E. bidentula</u> W. Sm.                                          | 7                                                         | .335                                          | ACF                   | 5.1                     | 4.5-7.0 | ~3                  | ~27 to 69   | 7.6                         | 3.1-13.9  | 2.7                          | 0.9-6.0 |
| <u>E. bigibba</u> Kütz.                                             | 4                                                         | .205                                          | ACF                   | 4.9                     | 4.6-5.0 | ~7                  | ~31 to ~3.9 | 4.1                         | 2.7-4.4   | 1.4                          | 0.4-3.0 |

| Taxon                                             | No. of lakes in which taxon was observed | % of grand total of all counts | pH pref. categ. | pH Geometric mean |         | Alkalinity $\mu\text{eq/L}$ |            | Total phosphorus $\mu\text{g/L}$ |          | Chlorophyll $\mu\text{g/L}$ |         |
|---------------------------------------------------|------------------------------------------|--------------------------------|-----------------|-------------------|---------|-----------------------------|------------|----------------------------------|----------|-----------------------------|---------|
|                                                   |                                          |                                |                 | Ave.              | Range   | Ave.                        | Range      | Ave.                             | Range    | Ave.                        | Range   |
| <u>E. curvata</u> (Kütz.) Lagerst.                | 27                                       | 2.149                          | ACF             | 5.0               | 4.5-7.8 | 0                           | -31 to 408 | 11.9                             | 2.4-21.6 | 4.5                         | 0.3-8.4 |
| <u>E. diodon</u> Ehr.                             | 1                                        | .006                           | ACF             | 4.8               | 4.8-4.8 | -13                         | -13 to -13 | 4.2                              | 4.2-4.2  | 1.0                         | 1.0-1.0 |
| <u>E. elegans</u> Østr.                           | 2                                        | .062                           | ACF             | 4.9               | 4.8-4.9 | -3                          | -13 to -2  | 3.2                              | 3.1-4.2  | 1.2                         | 0.9-1.2 |
| <u>E. exigua</u> (Bréb. <u>ex</u> Kütz.)<br>Rabh. | 15                                       | 1.031                          | ACB             | 5.2               | 4.6-7.3 | 1                           | -31 to 154 | 4.7                              | 2.4-18.1 | 1.9                         | 0.3-7.7 |
| <u>E. exigua</u> var. <u>bidens</u> Hust.         | 2                                        | .043                           | ACF             | 4.8               | 4.6-4.9 | -9                          | -31 to -5  | 4.3                              | 3.5-4.4  | 1.1                         | 0.4-1.2 |
| <u>E. exigua</u> var. <u>tridentula</u><br>Østr.  | 1                                        | .019                           | ACF             | 4.9               | 4.9-4.9 | -5                          | -5 to -5   | 4.4                              | 4.4-4.4  | 1.2                         | 1.2-1.2 |
| <u>E. fallax</u> A. Cl.                           | 4                                        | .143                           | ACF             | 4.9               | 4.8-5.0 | -5                          | -13 to -2  | 3.8                              | 2.7-4.4  | 1.4                         | 0.9-3.0 |
| <u>E. flexuosa</u> Breb. <u>ex</u> Kütz.          | 16                                       | .186                           | ACF             | 6.0               | 4.5-7.8 | 52                          | -27 to 408 | 7.2                              | 3.1-13.9 | 2.2                         | 0.8-6.6 |
| <u>E. gibbosa</u> Grun.                           | 1                                        | .006                           | ACF             | 5.5               | 5.5-5.5 | 4                           | 4 to 4     | 3.4                              | 3.4-3.4  | 0.3                         | 0.3-0.3 |
| <u>E. hexaglyphis</u> Erh.                        | 1                                        | .006                           | ACF             | 6.9               | 6.8-6.8 | 62                          | 62 to 62   | 7.2                              | 7.2-7.2  | 1.8                         | 1.8-1.8 |
| <u>E. incisa</u> W. Sm. <u>ex</u> Greg.           | 10                                       | .267                           | ACF             | 5.0               | 4.5-7.0 | -4                          | -31 to 77  | 4.3                              | 3.1-13.9 | 1.5                         | 0.4-6.0 |
| <u>E. kocheliensis</u> O. Müll.                   | 1                                        | .019                           | ACF             | 5.0               | 4.9-4.9 | -2                          | -2 to -2   | 3.1                              | 3.1-3.1  | 1.2                         | 1.2-1.2 |
| <u>E. lapponica</u> Grun. <u>ex</u> A. Cl.        | 2                                        | .050                           | ACF             | 5.0               | 4.7-7.3 | 15                          | -18 to 250 | 3.1                              | 3.1-3.1  | 1.7                         | 1.7-1.7 |

| Taxon                                                                | No. of<br>lakes<br>in which<br>taxon<br>was ob-<br>served | % of<br>grand<br>total<br>of<br>all<br>counts | pH<br>pref.<br>categ. | pH<br>Geometric<br>mean |         | Alkalinity<br>µeq/L |            | Total<br>phosphorus<br>µg/L |           | Chlorophyll <u>a</u><br>µg/L |         |
|----------------------------------------------------------------------|-----------------------------------------------------------|-----------------------------------------------|-----------------------|-------------------------|---------|---------------------|------------|-----------------------------|-----------|------------------------------|---------|
|                                                                      |                                                           |                                               |                       | Ave.                    | Range   | Ave.                | Range      | Ave.                        | Range     | Ave.                         | Range   |
| <u>E. major</u> (W. Sm.) Rabh.                                       | 1                                                         | .006                                          | ACF                   | 7.5                     | 7.5~7.5 | 253                 | 253 to 253 | 13.4                        | 13.4~13.4 | 1.8                          | 1.8~1.8 |
| <u>E. meisteri</u> Hust.                                             | 11                                                        | .205                                          | ACF                   | 5.7                     | 4.5~7.2 | 22                  | ~31 to 126 | 5.6                         | 3.1~8.9   | 2.2                          | 0.4~3.2 |
| <u>E. microcephala</u> Krasske <u>ex</u><br>Hust.                    | 3                                                         | .025                                          | ACF                   | 5.9                     | 4.5~7.0 | 32                  | ~26 to 77  | 6.6                         | 5.8~7.0   | 2.5                          | 2.2~3.2 |
| <u>E. microcephala</u> var.<br><u>tridentata</u> (A. Mayer)<br>Hust. | 5                                                         | .037                                          | ACF                   | 5.1                     | 4.7~6.4 | ~1                  | ~18 to 27  | 4.1                         | 2.4~5.8   | 1.5                          | 0.6~3.2 |
| <u>E. naegelii</u> Migula                                            | 6                                                         | .304                                          | ACF                   | 4.8                     | 4.5~6.0 | ~13                 | ~27 to 23  | 13.0                        | 2.7~21.6  | 4.9                          | 0.9~8.4 |
| <u>E. parallela</u> Ehr.                                             | 1                                                         | .006                                          | ACF                   | 5.2                     | 5.2~5.2 | 0                   | 0 to 0     | 5.8                         | 5.8~5.8   | 3.2                          | 3.2~3.2 |
| <u>E. pectinalis</u> (O.F. Müll.?)<br>Rabh.                          | 6                                                         | .081                                          | ACF                   | 6.4                     | 4.8~7.3 | 83                  | ~13 to 158 | 7.5                         | 3.1~10.0  | 1.8                          | 0.9~3.9 |
| <u>E. pectinalis</u> var. <u>minor</u><br>(Kütz.) Rabh.              | 15                                                        | .398                                          | ACF                   | 5.2                     | 4.5~7.2 | 4                   | ~31 to 135 | 11.0                        | 2.7~21.6  | 4.0                          | 0.4~8.4 |
| <u>E. pectinalis</u> var. <u>ventricosa</u><br>Grun.                 | 2                                                         | .012                                          | ACF                   | 6.8                     | 6.8~6.8 | 70                  | 62 to 79   | 7.2                         | 7.2~7.2   | 2.0                          | 1.8~2.3 |

| Taxon                                                                        | No. of lakes in which taxon was observed | % of grand total of all counts | pH pref. categ. | pH Geometric mean |         | Alkalinity $\mu\text{eq/L}$ |            | Total phosphorus $\mu\text{g/L}$ |          | Chlorophyll $a$ $\mu\text{g/L}$ |         |
|------------------------------------------------------------------------------|------------------------------------------|--------------------------------|-----------------|-------------------|---------|-----------------------------|------------|----------------------------------|----------|---------------------------------|---------|
|                                                                              |                                          |                                |                 | Ave.              | Range   | Ave.                        | Range      | Ave.                             | Range    | Ave.                            | Range   |
| <u>E. perpusilla</u> Grun.                                                   | 3                                        | .056                           | ACF             | 5.3               | 4.9-7.2 | 15                          | -2 to 126  | 4.9                              | 3.1-13.9 | 2.0                             | 1.2-6.0 |
| <u>E. praerupta</u> Ehr.                                                     | 4                                        | .056                           | ACF             | 6.3               | 4.9-7.0 | 38                          | -2 to 69   | 4.6                              | 2.4-6.3  | 1.5                             | 0.6-2.9 |
| <u>E. rhomboidea</u> Hust.                                                   | 1                                        | .031                           |                 | 5.0               | 5.0-5.0 | -2                          | -2 to -2   | 3.1                              | 3.1-3.1  | 1.2                             | 1.2-1.2 |
| <u>E. septentrionalis</u> Østr.                                              | 13                                       | .205                           | ACF             | 5.9               | 4.5-7.5 | 54                          | -27 to 253 | 6.3                              | 2.7-13.4 | 2.0                             | 0.8-3.0 |
| <u>E. serra</u> Ehr.                                                         | 6                                        | .118                           | ACF             | 4.9               | 4.5-6.6 | 15                          | -31 to 77  | 5.8                              | 3.5-13.9 | 2.1                             | 0.4-6.0 |
| <u>E. cf. soleirolii</u> (Kütz.) Rabh.                                       | 1                                        | .012                           |                 | 5.0               | 5.0-5.0 | -2                          | -2 to -2   | 3.1                              | 3.1-3.1  | 1.2                             | 1.2-1.2 |
| <u>E. sudetica</u> O. Müll.                                                  | 6                                        | .211                           | ACF             | 4.8               | 4.5-6.6 | -14                         | -27 to 42  | 5.4                              | 3.1-13.9 | 1.9                             | 0.8-6.0 |
| <u>E. tenella</u> (Grun.) Cl.                                                | 18                                       | 1.509                          | ACF             | 5.1               | 4.5-7.0 | -6                          | -31 to 77  | 6.9                              | 2.7-21.6 | 2.6                             | 0.3-8.4 |
| <u>E. triodon</u> Ehr.                                                       | 2                                        | .043                           | ACF             | 4.8               | 4.8-5.0 | 11                          | -13 to -4  | 4.0                              | 2.7-4.2  | 1.2                             | 0.9-3.0 |
| <u>E. valida</u> Hust.                                                       | 3                                        | .025                           |                 | 5.3               | 4.6-7.0 | 0                           | -31 to 69  | 4.4                              | 3.5-6.3  | 0.9                             | 0.4-1.5 |
| <u>E. vanheurckii</u> Patr.                                                  | 3                                        | .019                           | ACF             | 6.3               | 5.7-7.0 | 33                          | 11 to 69   | 6.5                              | 4.6-8.7  | 1.6                             | 0.9-2.5 |
| <u>E. vanheurckii</u> var. <u>intermedia</u> (Krasske <u>ex</u> Hust.) Patr. | 13                                       | .255                           | ACF             | 5.2               | 4.5-7.3 | 5                           | -27 to 250 | 12.0                             | 2.7-21.6 | 4.6                             | 0.9-8.4 |
| <u>E. sp.</u>                                                                | 28                                       | 2.528                          |                 | 5.3               | 4.5-7.8 | 14                          | -31 to 408 | 6.7                              | 2.7-21.6 | 2.8                             | 0.3-8.4 |
| <u>Fragilaria bicapitata</u> A. Mayer                                        | 2                                        | .143                           |                 | 5.7               | 5.5-7.5 | 26                          | 4 to 253   | 4.3                              | 3.4-13.4 | 0.5                             | 0.3-1.8 |



| Taxon                                                    | No. of lakes in which taxon was observed | % of grand total of all counts | pH pref. categ. | pH Geometric mean |         | Alkalinity $\mu\text{eq/L}$ |            | Total phosphorus $\mu\text{g/L}$ |          | Chlorophyll <u>a</u> $\mu\text{g/L}$ |         |
|----------------------------------------------------------|------------------------------------------|--------------------------------|-----------------|-------------------|---------|-----------------------------|------------|----------------------------------|----------|--------------------------------------|---------|
|                                                          |                                          |                                |                 | Ave.              | Range   | Ave.                        | Range      | Ave.                             | Range    | Ave.                                 | Range   |
| <u>F. brevistriata</u> Grun.                             | 9                                        | 1.708                          | ALKF            | 7.2               | 5.2-7.5 | 149                         | 0 to 253   | 12.2                             | 4.2-18.1 | 4.2                                  | 1.5-7.7 |
| <u>F. constricta</u> Ehr.                                | 7                                        | .298                           | ACF             | 5.2               | 4.6-7.0 | -4                          | -31 to 69  | 4.1                              | 3.4-6.3  | 0.8                                  | 0.3-3.2 |
| <u>F. constricta</u> f. <u>stricta</u><br>(A. Cl.) Hust. | 5                                        | .441                           | ACF             | 5.5               | 4.6-6.8 | 3                           | -31 to 79  | 3.6                              | 3.1-7.2  | 0.4                                  | 0.3-2.3 |
| <u>F. constricta</u> var. <u>trinodis</u><br>Hust.       | 1                                        | .006                           |                 | 5.7               | 5.7-5.7 | 20                          | 20 to 20   | 4.6                              | 4.6-4.6  | 0.9                                  | 0.9-0.9 |
| <u>F. construens</u> (Ehr.) Grun.                        | 10                                       | .926                           |                 | 7.4               | 5.1-7.8 | 216                         | -5 to 408  | 10.4                             | 2.4-18.1 | 2.3                                  | 0.6-7.7 |
| <u>F. construens</u> var. <u>binodis</u><br>(Ehr.) Grun. | 4                                        | .155                           | ALKF            | 7.1               | 6.8-7.3 | 113                         | 62 to 154  | 10.1                             | 7.2-18.1 | 3.6                                  | 1.8-7.7 |
| <u>F. construens</u> var. <u>pumila</u> Grun.            | 4                                        | .416                           |                 | 7.3               | 6.6-7.5 | 192                         | 33 to 253  | 13.1                             | 7.0-18.1 | 2.9                                  | 0.9-7.7 |
| <u>F. construens</u> var. <u>venter</u><br>(Ehr.) Grun.  | 22                                       | 4.721                          | ALKF            | 7.3               | 5.1-7.8 | 200                         | -5 to 408  | 10.4                             | 4.2-18.1 | 2.6                                  | 0.8-7.7 |
| <u>F. crotonensis</u> Kitton                             | 2                                        | 1.236                          | ALKF            | 7.5               | 7.3-7.8 | 312                         | 250 to 408 | 7.4                              | 7.4-7.4  | 3.2                                  | 3.2-3.2 |
| <u>F. leptostauron</u> (Ehr.) Hust.                      | 2                                        | .012                           | ALKF            | 7.5               | 7.3-7.8 | 329                         | 250 to 408 | 7.4                              | 7.4-7.4  | 3.2                                  | 3.2-3.2 |
| <u>F. pinnata</u> Ehr.                                   | 13                                       | 2.155                          | ALKF            | 7.3               | 6.9-7.8 | 200                         | 59 to 408  | 11.6                             | 4.2-18.1 | 3.9                                  | 0.8-7.7 |

| Taxon                                                                   | No. of lakes in which taxon was observed | % of grand total of all counts | pH pref. categ. | pH Geometric mean |         | Alkalinity $\mu\text{eq/L}$ |            | Total phosphorus $\mu\text{g/L}$ |           | Chlorophyll <u>a</u> $\mu\text{g/L}$ |         |
|-------------------------------------------------------------------------|------------------------------------------|--------------------------------|-----------------|-------------------|---------|-----------------------------|------------|----------------------------------|-----------|--------------------------------------|---------|
|                                                                         |                                          |                                |                 | Ave.              | Range   | Ave.                        | Range      | Ave.                             | Range     | Ave.                                 | Range   |
| <u>F. vaucheriae</u> (Kütz.) Peters.                                    | 3                                        | .025                           | ALKF            | 7.4               | 7.2-7.7 | 224                         | 126 to 392 | 10.7                             | 8.9-13.4  | 2.4                                  | 1.8-2.9 |
| <u>F. virescens</u> Ralfs                                               | 17                                       | .938                           | IND             | 6.8               | 5.5-7.5 | 88                          | 4 to 253   | 8.3                              | 2.4-18.1  | 2.5                                  | 0.3-7.7 |
| <u>F. virescens</u> var. 1                                              | 7                                        | 2.876                          | ACB             | 4.8               | 4.6-5.5 | -13                         | -31 to 4   | 3.3                              | 2.7-4.4   | 1.5                                  | 0.3-3.0 |
| <u>F. spp.</u>                                                          | 15                                       | 1.503                          |                 | 7.1               | 4.9-7.8 | 200                         | -2 to 408  | 8.8                              | 3.1-18.1  | 3.3                                  | 0.8-7.7 |
| <u>Frustulia rhomboides</u> (Ehr.)<br>DeT.                              | 8                                        | .062                           | ACF             | 5.5               | 4.6-6.8 | 9                           | -31 to 79  | 5.6                              | 2.4-13.9  | 1.6                                  | 0.4-6.0 |
| <u>F. rhomboides</u> var. <u>capitata</u><br>(A. Mayer) Patr.           | 10                                       | .578                           | ACF             | 5.4               | 4.7-7.0 | 7                           | -18 to 126 | 6.8                              | 3.1-13.9  | 2.8                                  | 0.3-6.0 |
| <u>F. rhomboides</u> var. <u>crassinervia</u><br>(Bréb. ex W. Sm.) Ross | 5                                        | .050                           | ACF             | 6.4               | 4.7-7.2 | 52                          | -31 to 135 | 7.3                              | 3.1-13.9  | 2.9                                  | 0.8-6.0 |
| <u>F. rhomboides</u> var. <u>saxonica</u><br>(Rabh.) DeT.               | 26                                       | 1.280                          | ACF             | 5.2               | 4.5-7.2 | 1                           | -2 to 69   | 9.6                              | 2.7-21.6  | 3.3                                  | 0.3-8.4 |
| <u>F. rhomboides</u> vars.                                              | 3                                        | .050                           |                 | 5.5               | 5.0-7.0 | 16                          | -2 to 69   | 4.6                              | 3.1-6.3   | 1.8                                  | 1.2-3.2 |
| <u>Gomphonema acuminatum</u> Ehr.                                       | 1                                        | .006                           | ALKF            | 7.8               | 7.8-7.8 | 366                         | 366 to 366 | 13.2                             | 13.2-13.2 | 6.6                                  | 6.6-6.6 |
| <u>G. affine</u> Kütz.                                                  | 1                                        | .012                           |                 | 5.1               | 5.1-5.1 | -5                          | -5 to -5   | 5.2                              | 5.2-5.2   | 0.9                                  | 0.9-0.9 |

| Taxon                                                            | No. of lakes in which taxon was observed | % of grand total of all counts | pH pref. categ. | pH Geometric mean |         | Alkalinity $\mu\text{eq/L}$ |            | Total phosphorus $\mu\text{g/L}$ |          | Chlorophyll <u>a</u> $\mu\text{g/L}$ |         |
|------------------------------------------------------------------|------------------------------------------|--------------------------------|-----------------|-------------------|---------|-----------------------------|------------|----------------------------------|----------|--------------------------------------|---------|
|                                                                  |                                          |                                |                 | Ave.              | Range   | Ave.                        | Range      | Ave.                             | Range    | Ave.                                 | Range   |
| <u>G. angustatum</u> (Kütz.) Rabh.                               | 6                                        | .087                           | ALKF            | 6.6               | 6.0-7.8 | 79                          | 23 to 408  | 9.2                              | 6.3-13.9 | 3.1                                  | 0.8-6.0 |
| <u>G. gracile</u> Ehr. <u>emend.</u> V.H.                        | 1                                        | .006                           | IND             | 7.2               | 7.2-7.2 | 126                         | 126 to 126 | 8.9                              | 8.9-8.9  | 2.9                                  | 2.9-2.9 |
| <u>G. parvulum</u> (Kütz.)                                       | 2                                        | .012                           | IND             | 5.7               | 4.8-6.6 | 14                          | -13 to 40  | 5.0                              | 4.2-5.8  | 1.9                                  | 0.9-2.9 |
| <u>B. sp.</u>                                                    | 13                                       | .373                           |                 | 6.9               | 5.7-7.8 | 155                         | 11 to 408  | 9.8                              | 2.4-13.9 | 3.7                                  | 0.6-6.6 |
| <u>Melosira ambigua</u> (Grun.)<br>Müller                        | 17                                       | 1.950                          |                 | 7.1               | 6.4-7.8 | 146                         | 27 to 408  | 6.7                              | 2.7-14.1 | 2.1                                  | 0.6-6.6 |
| <u>M. distans</u> (Ehr.) Kütz.                                   | 30                                       | 5.062                          | ACF             | 5.9               | 4.5-7.8 | 36                          | -31 to 408 | 5.5                              | 2.4-18.1 | 1.4                                  | 0.3-7.7 |
| <u>M. distans</u> var. <u>africana</u><br>Müller                 | 9                                        | .416                           | ACF             | 6.3               | 4.6-7.2 | 55                          | -31 to 135 | 6.7                              | 3.1-10.1 | 1.8                                  | 0.4-3.3 |
| <u>M. distans</u> var. <u>alpigena</u> Grun.                     | 2                                        | .099                           | IND             | 6.9               | 6.2-7.0 | 65                          | 11 to 69   | 6.5                              | 6.3-8.7  | 1.6                                  | 1.5-2.5 |
| <u>M. distans</u> var. <u>lirata</u> (Ehr.)                      | 10                                       | .808                           | ACF             | 6.5               | 5.1-7.3 | 49                          | -5 to 154  | 6.0                              | 2.4-18.1 | 1.6                                  | 0.6-7.7 |
| Bethge                                                           |                                          |                                |                 |                   |         |                             |            |                                  |          |                                      |         |
| <u>M. distans</u> var. <u>lirata</u> f.<br><u>seriata</u> Müller | 8                                        | .373                           | ACF             | 6.1               | 4.6-7.3 | 51                          | -31 to 158 | 6.2                              | 3.5-10.0 | 1.4                                  | 0.4-2.9 |
| <u>M. italica</u> subsp. <u>subarctica</u><br>Müller             | 4                                        | 0.223                          | ALKF            | 7.3               | 7.1-7.5 | 217                         | 126 to 253 | 11.9                             | 9.5-14.1 | 2.7                                  | 1.8-3.3 |

| Taxon                                                    | No. of lakes in which taxon was observed | % of grand total of all counts | pH pref. categ. | pH Geometric mean |         | Alkalinity $\mu\text{eq/L}$ |            | Total phosphorus $\mu\text{g/L}$ |           | Chlorophyll $a$ $\mu\text{g/L}$ |         |
|----------------------------------------------------------|------------------------------------------|--------------------------------|-----------------|-------------------|---------|-----------------------------|------------|----------------------------------|-----------|---------------------------------|---------|
|                                                          |                                          |                                |                 | Ave.              | Range   | Ave.                        | Range      | Ave.                             | Range     | Ave.                            | Range   |
| <u>M. spp.</u>                                           | 7                                        | .398                           |                 | 5.8               | 4.7-7.8 | 46                          | -18 to 408 | 6.7                              | 3.1-13.9  | 3.0                             | 1.5-6.0 |
| <u>Meridion circulare</u> (Grev.) Ag.                    | 1                                        | .081                           | ALKF            | 7.8               | 7.8-7.8 | 408                         | 408 to 408 | 7.4                              | 7.4-7.4   | 3.2                             | 3.2-3.2 |
| <u>M. circulare</u> var. <u>constrictum</u> (Ralfs) V.H. | 1                                        | .012                           | ALKF            | 7.5               | 7.5-7.5 | 253                         | 253 to 253 | 13.4                             | 13.4-13.4 | 1.8                             | 1.8-1.8 |
| <u>Navicula angusta</u> Grun.                            | 1                                        | .006                           |                 | 6.6               | 6.6-6.6 | 40                          | 40 to 40   | 5.8                              | 5.8-5.8   | 2.9                             | 2.9-2.9 |
| <u>N. cf. arvensis</u> Hust.                             | 6                                        | .261                           |                 | 6.4               | 4.7-7.3 | 73                          | -16 to 154 | 13.4                             | 4.2-21.6  | 5.1                             | 0.8-8.4 |
| <u>N. cocconeiformis</u> Greg. <u>ex</u> Grev.           | 10                                       | .093                           | IND             | 6.9               | 6.0-7.5 | 97                          | 23 to 253  | 8.3                              | 4.2-13.9  | 2.2                             | 0.8-6.0 |
| <u>N. contenta</u> var. <u>biceps</u> (Arn.) V.H.        | 1                                        | .006                           |                 | 5.0               | 5.0-5.0 | -4                          | -4 to -4   | 2.7                              | 2.7-2.7   | 3.0                             | 3.0-3.0 |
| <u>N. cryptocephala</u> Kütz.                            | 3                                        | .143                           | ALKF            | 7.6               | 7.2-7.7 | 310                         | 118 to 392 | 10.6                             | 4.2-11.6  | 2.3                             | 1.5-2.9 |
| <u>N. explanata</u> Hust.                                | 1                                        | .006                           | IND             | 7.2               | 7.2-7.2 | 118                         | 118 to 118 | 4.2                              | 4.2-4.2   | 1.5                             | 1.5-1.5 |
| <u>N. gysingensis</u> Foged                              | 6                                        | .050                           | ACF             | 7.0               | 6.8-7.3 | 128                         | 62 to 250  | 7.5                              | 6.3-10.0  | 2.0                             | 1.5-2.3 |
| <u>N. laevis</u> Kütz.                                   | 7                                        | .118                           | IND             | 6.6               | 5.7-7.3 | 78                          | 20 to 154  | 8.6                              | 4.2-18.1  | 2.9                             | 0.8-7.7 |
| <u>N. lanceolata</u> (Ag.) Kütz.                         | 1                                        | .006                           | ALKF            | 7.0               | 7.0-7.0 | 69                          | 69 to 69   | 6.3                              | 6.3-6.3   | 1.5                             | 1.5-1.5 |

| Taxon                                       | No. of lakes in which taxon was observed | % of grand total of all counts | pH pref. categ. | pH Geometric mean |         | Alkalinity $\mu\text{eq/L}$ |            | Total phosphorus $\mu\text{g/L}$ |           | Chlorophyll <u>a</u> $\mu\text{g/L}$ |         |
|---------------------------------------------|------------------------------------------|--------------------------------|-----------------|-------------------|---------|-----------------------------|------------|----------------------------------|-----------|--------------------------------------|---------|
|                                             |                                          |                                |                 | Ave.              | Range   | Ave.                        | Range      | Ave.                             | Range     | Ave.                                 | Range   |
| <u>N. mediocris</u> Krasske                 | 11                                       | .224                           | IND             | 5.4               | 4.6-7.5 | 11                          | -31 to 253 | 4.3                              | 2.7-13.4  | 1.1                                  | 0.4-3.0 |
| <u>N. minima</u> Grun.                      | 20                                       | .832                           | ALKF            | 7.0               | 5.1-7.8 | 112                         | -5 to 408  | 9.2                              | 4.2-18.1  | 2.9                                  | 0.8-7.7 |
| <u>N. cf. mouri</u> Patr.                   | 2                                        | .019                           |                 | 7.6               | 7.3-7.7 | 313                         | 154 to 392 | 13.8                             | 11.6-18.1 | 4.0                                  | 2.1-7.7 |
| <u>N. notha</u> Wallace                     | 21                                       | .578                           | IND             | 6.0               | 4.6-7.8 | 59                          | -31 to 408 | 6.8                              | 2.7-21.6  | 2.3                                  | 0.3-8.4 |
| <u>N. pseudoscutiformis</u> Hust.           | 12                                       | .168                           | IND             | 6.7               | 6.2-7.3 | 62                          | 11 to 250  | 7.2                              | 2.4-9.7   | 2.2                                  | 0.6-3.9 |
| <u>N. pupula</u> Kütz.                      | 13                                       | .193                           | IND             | 6.9               | 5.4-7.8 | 147                         | 6 to 392   | 8.6                              | 4.2-13.4  | 2.4                                  | 0.8-6.6 |
| <u>N. radiosa</u> Kütz.                     | 4                                        | .062                           | IND             | 7.1               | 5.7-7.7 | 159                         | 20 to 392  | 7.9                              | 4.6-11.6  | 1.7                                  | 0.9-2.1 |
| <u>N. radiosa</u> var. <u>parva</u> Wallace | 6                                        | .099                           |                 | 6.2               | 5.4-7.2 | 37                          | 6 to 118   | 9.2                              | 4.2-13.9  | 3.4                                  | 0.9-6.0 |
| <u>N. seminulum</u> Grun.                   | 9                                        | .460                           | IND             | 6.7               | 6.2-7.8 | 66                          | 11 to 366  | 8.6                              | 4.2-13.4  | 2.5                                  | 0.8-6.6 |
| <u>N. subatomoides</u> Hust.                | 1                                        | .012                           | ACF             | 6.9               | 6.9-6.9 | 62                          | 62 to 62   | 7.2                              | 7.2-7.2   | 1.8                                  | 1.8-1.8 |
| <u>N. subtilissima</u> Cl.                  | 21                                       | 1.851                          | ACB             | 5.1               | 4.6-7.0 | -4                          | -31 to 79  | 9.0                              | 2.4-21.6  | 3.4                                  | 0.3-8.4 |
| <u>N. tridentula</u> Krasske                | 1                                        | .006                           |                 | 7.7               | 7.7-7.7 | 392                         | 392 to 392 | 11.7                             | 11.7-11.7 | 2.1                                  | 2.1-2.1 |
| <u>N. cf. vanheurckii</u> Patr.             | 1                                        | .031                           | ALKF            | 5.0               | 5.0-5.0 | -2                          | -2 to -2   | 3.1                              | 3.1-3.1   | 1.2                                  | 1.2-1.2 |
| <u>N. spp.</u>                              | 30                                       | 1.528                          |                 | 6.9               | 4.5-7.8 | 134                         | -31 to 408 | 9.1                              | 2.4-18.1  | 2.9                                  | 0.4-7.7 |

| Taxon                                                       | No. of lakes in which taxon was observed | % of grand total of all counts | pH pref. categ. | pH Geometric mean |         | Alkalinity $\mu\text{eq/L}$ |            | Total phosphorus $\mu\text{g/L}$ |          | Chlorophyll <u>a</u> $\mu\text{g/L}$ |         |
|-------------------------------------------------------------|------------------------------------------|--------------------------------|-----------------|-------------------|---------|-----------------------------|------------|----------------------------------|----------|--------------------------------------|---------|
|                                                             |                                          |                                |                 | Ave.              | Range   | Ave.                        | Range      | Ave.                             | Range    | Ave.                                 | Range   |
| <u>Neidium affine</u> (Ehr.) Pfitz.                         | 20                                       | .845                           | IND             | 5.1               | 4.5-7.8 | 4                           | ~31 to 366 | 4.5                              | 3.1-13.9 | 1.4                                  | 0.4-6.6 |
| <u>N. affine</u> var. <u>amphirhynchus</u> (Ehr.) Cl.       | 2                                        | .019                           | IND             | 6.3               | 6.0-7.0 | 35                          | 23 to 59   | 10.8                             | 4.6-13.9 | 4.3                                  | 0.8-6.0 |
| <u>N. affine</u> var. <u>longiceps</u> (Greg.) Cl.          | 13                                       | .143                           | ACF             | 6.1               | 4.9-7.5 | 36                          | ~5 to 253  | 6.7                              | 3.1-13.9 | 1.6                                  | 0.8-6.0 |
| <u>N. bisulcatum</u> (Lagerst.) Cl.                         | 7                                        | .292                           | IND             | 5.2               | 4.9-7.0 | 2                           | ~5 to 77   | 4.4                              | 3.1-7.2  | 1.2                                  | 0.8-2.9 |
| <u>N. boyeri</u> Reim.                                      | 1                                        | .006                           |                 | 6.6               | 6.6-6.6 | 40                          | 40 to 40   | 5.8                              | 5.8-5.8  | 2.9                                  | 2.9-2.9 |
| <u>N. iridis</u> (Ehr.) Cl.                                 | 3                                        | .068                           | IND             | 5.1               | 4.7-7.5 | 18                          | ~18 to 253 | 4.0                              | 3.1-13.4 | 1.4                                  | 1.2-1.8 |
| <u>N. iridis</u> var. <u>amphigomphus</u> (Ehr.) A Mayer    | 10                                       | .118                           | IND             | 5.1               | 4.5-6.6 | ~6                          | ~31 to 40  | 4.4                              | 2.7-5.8  | 1.5                                  | 0.3-3.2 |
| <u>N. iridis</u> var. <u>ampliatum</u> (Ehr.) Cl.           | 1                                        | .012                           | IND             | 5.2               | 5.2-5.2 | 0                           | 0 to 0     | 5.8                              | 5.8-5.8  | 3.2                                  | 3.2-3.2 |
| <u>N. ladogense</u> var. <u>densestriatum</u> (Østr.) Foged | 1                                        | .012                           |                 | 4.9               | 4.9-4.9 | ~5                          | ~5 to ~5   | 4.4                              | 4.4-4.4  | 1.2                                  | 1.2-1.2 |
| <u>N. maximum</u> (Cl.) Meist.                              | 2                                        | .012                           |                 | 7.1               | 7.0-7.2 | 98                          | 77 to 118  | 5.6                              | 4.2-7.0  | 1.8                                  | 1.5-2.2 |

| Taxon                                 | No. of lakes in which taxon was observed | % of grand total of all counts | pH pref. categ. | pH Geometric mean |         | Alkalinity $\mu\text{eq/L}$ |            | Total phosphorus $\mu\text{g/L}$ |           | Chlorophyll <u>a</u> $\mu\text{g/L}$ |         |
|---------------------------------------|------------------------------------------|--------------------------------|-----------------|-------------------|---------|-----------------------------|------------|----------------------------------|-----------|--------------------------------------|---------|
|                                       |                                          |                                |                 | Ave.              | Range   | Ave.                        | Range      | Ave.                             | Range     | Ave.                                 | Range   |
| <u>N. saccoense</u> Reim.             | 1                                        | .012                           |                 | 5.4               | 5.4-5.4 | 6                           | 6 to 618   | --                               | --        | --                                   | --      |
| <u>N. spp.</u>                        | 5                                        | .068                           |                 | 5.2               | 4.6-6.0 | -3                          | -31 to 23  | 10.5                             | 3.1-21.6  | 4.0                                  | 0.4-8.4 |
| <u>Nitzschia acuta</u> Hantz.         | 10                                       | .106                           | ALKF            | 6.9               | 6.0-7.5 | 106                         | 23 to 253  | 10.3                             | 4.6-18.1  | 3.2                                  | 0.8-7.7 |
| <u>N. denticula</u> Grun.             | 3                                        | .236                           | ALKF            | 7.7               | 7.2-7.7 | 372                         | 129 to 392 | 11.7                             | 10.0-14.8 | 2.3                                  | 2.1-6.8 |
| <u>N. cf. dissipata</u> (Kütz.) Grun. | 2                                        | .031                           | ALKF            | 6.4               | 6.0-6.5 | 38                          | 23 to 42   | 8.0                              | 6.6-13.9  | 1.9                                  | 0.8-6.0 |
| <u>N. cf. fonticola</u> Grun.         | 8                                        | .242                           |                 | 6.9               | 6.0-7.7 | 160                         | 11 to 392  | 10.0                             | 6.3-14.8  | 2.7                                  | 0.8-6.8 |
| <u>N. gracilis</u> Hantz.             | 11                                       | .180                           | ALKF            | 6.7               | 5.1-7.8 | 116                         | -5 to 392  | 8.4                              | 5.2-14.8  | 2.2                                  | 0.8-6.8 |
| <u>N. cf. hantzschiana</u> Rabh.      | 3                                        | .019                           |                 | 6.3               | 5.2-7.0 | 43                          | 0 to 69    | 6.4                              | 5.8-7.2   | 2.1                                  | 1.5-3.2 |
| <u>N. cf. inconspicua</u> Grun.       | 2                                        | .025                           |                 | 7.0               | 7.0-7.0 | 64                          | 59 to 69   | 5.4                              | 4.6-6.3   | 1.1                                  | 0.8-1.5 |
| <u>N. linearis</u> W. Sm.             | 2                                        | .019                           | ALKF            | 5.8               | 4.8-7.8 | 128                         | -13 to 408 | 5.3                              | 4.2-7.3   | 1.7                                  | 0.9-3.2 |
| <u>N. microcephala</u> Grun.          | 2                                        | .037                           | ALKF            | 7.1               | 7.0-7.2 | 110                         | 77 to 126  | 8.2                              | 7.0-8.9   | 2.6                                  | 2.2-2.9 |
| <u>N. palea</u> (Kütz.) W. Sm.        | 20                                       | .714                           | IND             | 6.3               | 4.5-7.8 | 50                          | -26 to 366 | 8.4                              | 4.2-21.6  | 2.6                                  | 0.8-8.4 |
| <u>N. paleacea</u> Grun.              | 11                                       | .230                           |                 | 6.5               | 5.7-7.8 | 123                         | 20 to 408  | 7.3                              | 2.4-14.8  | 2.3                                  | 0.6-6.8 |
| <u>N. subtilis</u> (Kütz.) Grun.      | 1                                        | .006                           |                 | 6.9               | 6.9-6.9 | 62                          | 62 to 62   | 7.2                              | 7.2-7.2   | 1.8                                  | 1.8-1.8 |

| Taxon                                                                         | No. of lakes in which taxon was observed | % of grand total of all counts | pH pref. categ. | pH Geometric mean |         | Alkalinity $\mu\text{eq/L}$ |            | Total phosphorus $\mu\text{g/L}$ |          | Chlorophyll <u>a</u> $\mu\text{g/L}$ |         |
|-------------------------------------------------------------------------------|------------------------------------------|--------------------------------|-----------------|-------------------|---------|-----------------------------|------------|----------------------------------|----------|--------------------------------------|---------|
|                                                                               |                                          |                                |                 | Ave.              | Range   | Ave.                        | Range      | Ave.                             | Range    | Ave.                                 | Range   |
| <u>N. spp.</u>                                                                | 13                                       | .385                           |                 | 6.9               | 4.7-7.8 | 138                         | -18 to 408 | 8.7                              | 3.1-14.8 | 2.3                                  | 0.8-6.8 |
| <u>Peronia fibula</u> (Breb. <u>ex</u> Kütz.) Ross                            | 4                                        | .043                           | ACF             | 5.0               | 4.8-5.1 | -5                          | -13 to -2  | 4.0                              | 3.1-5.2  | 1.1                                  | 0.9-1.2 |
| <u>Pinnularia abaujensis</u> (Pant.) Ross                                     | 6                                        | .429                           | ACF             | 4.5               | 4.5-6.0 | -24                         | -31 to 23  | 5.7                              | 3.5-13.9 | 1.6                                  | 0.4-6.0 |
| <u>P. cf. abaujensis</u> var. <u>rostrata</u> (Patr.) Patr.                   | 1                                        | .031                           | ACF             | 6.6               | 6.6-6.6 | 33                          | 33 to 33   | 7.0                              | 7.0-7.0  | 0.9                                  | 0.9-0.9 |
| <u>P. abaujensis</u> var. <u>subundulata</u> (A. Mayer <u>ex</u> Hust.) Patr. | 12                                       | .112                           | ACF             | 5.9               | 4.5-7.2 | 37                          | -27 to 129 | 6.7                              | 2.7-14.8 | 2.9                                  | 0.9-6.8 |
| <u>P. biceps</u> Greg.                                                        | 18                                       | 2.348                          | ACF             | 5.6               | 4.5-7.2 | 9                           | -27 to 129 | 8.8                              | 3.4-21.6 | 2.9                                  | 0.3-8.4 |
| <u>P. biceps</u> f. <u>petersenii</u> Ross                                    | 6                                        | .062                           | IND             | 6.3               | 5.1-7.2 | 36                          | -5 to 126  | 9.3                              | 5.2-13.9 | 3.0                                  | 0.8-6.0 |
| <u>P. borealis</u> Ehr.                                                       | 2                                        | .019                           | IND             | 5.2               | 4.5-6.5 | -4                          | -27 to 42  | 6.6                              | 6.6-6.6  | 0.8                                  | 0.8-0.8 |
| <u>P. braunii</u> (Grun.) Cl.                                                 | 4                                        | .230                           | ACF             | 6.2               | 5.7-7.2 | 51                          | 20 to 126  | 6.0                              | 4.6-8.9  | 1.4                                  | 0.9-2.9 |
| <u>P. cf. caudata</u> (Boyer) Patr.                                           | 2                                        | .031                           |                 | 5.3               | 4.9-6.6 | 7                           | -2 to 40   | 3.6                              | 3.1-5.8  | 1.6                                  | 1.2-2.9 |
| <u>P. divergentissima</u> (Grun.) Cl.                                         | 4                                        | .056                           | ACF             | 6.3               | 6.0-6.6 | 24                          | 11 to 42   | 9.1                              | 5.8-13.9 | 2.9                                  | 0.8-6.0 |



| Taxon                                    | No. of lakes in which taxon was observed | % of grand total of all counts | pH pref. categ. | pH Geometric mean |         | Alkalinity $\mu\text{eq/L}$ |            | Total phosphorus $\mu\text{g/L}$ |           | Chlorophyll $a$ $\mu\text{g/L}$ |         |
|------------------------------------------|------------------------------------------|--------------------------------|-----------------|-------------------|---------|-----------------------------|------------|----------------------------------|-----------|---------------------------------|---------|
|                                          |                                          |                                |                 | Ave.              | Range   | Ave.                        | Range      | Ave.                             | Range     | Ave.                            | Range   |
| <u>P. formica</u> (Ehr.) Patr.           | 1                                        | .025                           |                 | 6.2               | 6.2-6.2 | 11                          | 11 to 11   | 8.7                              | 8.7-8.7   | 2.5                             | 2.5-2.5 |
| <u>P. maior</u> (Kütz.) Rabh.            | 1                                        | .012                           | IND             | 6.5               | 6.5-6.5 | 42                          | 42 to 42   | 6.6                              | 6.6-6.6   | 0.8                             | 0.8-0.8 |
| <u>P. mesolepta</u> (Ehr.) W. Sm.        | 2                                        | .012                           | ACF             | 5.8               | 4.8-6.8 | 25                          | -13 to 62  | 5.7                              | 4.2-7.2   | 1.4                             | 0.9-1.8 |
| <u>P. microstauron</u> (Ehr.) Cl.        | 14                                       | .919                           | ACF             | 5.2               | 4.5-7.2 | 0                           | -27 to 135 | 4.9                              | 2.7-10.1  | 1.9                             | 0.3-3.3 |
| <u>P. obscura</u> Krasske                | 1                                        | .006                           |                 | 7.2               | 7.2-7.2 | 126                         | 126 to 126 | 8.9                              | 8.9-8.9   | 2.9                             | 2.9-2.9 |
| <u>P. rupestris</u> Hantz.               | 4                                        | .043                           |                 | 5.3               | 4.8-5.5 | 0                           | -13 to 4   | 3.8                              | 2.7-5.8   | 1.2                             | 0.3-3.2 |
| <u>P. ruttneri</u> Hust.                 | 1                                        | .006                           | ACF             | 7.3               | 7.3-7.3 | 154                         | 154 to 154 | 18.2                             | 18.2-18.2 | 7.7                             | 7.7-7.7 |
| <u>P. cf. subcapitata</u> Greg.          | 1                                        | .081                           | IND             | 4.5               | 4.5-4.5 | -27                         | -27 to -27 | --                               | --        | --                              | --      |
| <u>P. cf. sublinearis</u> (Grun.) Cl.    | 2                                        | .012                           |                 | 6.0               | 4.8-7.2 | 53                          | -13 to 118 | 4.2                              | 4.2-4.2   | 1.2                             | 0.9-1.5 |
| <u>P. viridis</u> (Nitz.) Ehr.           | 4                                        | .025                           | IND             | 7.1               | 6.8-7.3 | 107                         | 62 to 158  | 8.9                              | 7.2-10.0  | 2.7                             | 1.8-3.9 |
| <u>P. spp.</u>                           | 27                                       | 1.646                          |                 | 5.6               | 4.5-7.8 | 19                          | -31 to 408 | 5.4                              | 2.4-14.8  | 1.8                             | 0.3-6.8 |
| <u>Rhizosolenia</u> sp.                  | 1                                        | .006                           |                 | 7.8               | 7.8-7.8 | 408                         | 408 to 408 | 7.4                              | 7.4-7.4   | 3.2                             | 3.2-3.2 |
| <u>Rhopalodia gibba</u> (Ehr.) O.        | 1                                        | .006                           | ALKF            | 7.3               | 7.3-7.3 | 158                         | 158 to 158 | 10.0                             | 10.0-10.0 | 2.2                             | 2.2-2.2 |
| Müll.                                    |                                          |                                |                 |                   |         |                             |            |                                  |           |                                 |         |
| <u>Semiorbis hemicyclus</u> (Ehr.) Patr. | 8                                        | .323                           | ACF             | 4.9               | 4.6-5.7 | -8                          | -31 to 20  | 4.3                              | 3.1-5.8   | 1.1                             | 0.3-3.2 |

| Taxon                                                       | No. of lakes in which taxon was observed | % of grand total of all counts | pH pref. categ. | pH Geometric mean |         | Alkalinity $\mu\text{eq/L}$ |            | Total phosphorus $\mu\text{g/L}$ |           | Chlorophyll $a$ $\mu\text{g/L}$ |         |
|-------------------------------------------------------------|------------------------------------------|--------------------------------|-----------------|-------------------|---------|-----------------------------|------------|----------------------------------|-----------|---------------------------------|---------|
|                                                             |                                          |                                |                 | Ave.              | Range   | Ave.                        | Range      | Ave.                             | Range     | Ave.                            | Range   |
| <u>Stauroneis anceps</u> Ehr.                               | 8                                        | .149                           | IND             | 6.1               | 4.8-7.1 | 20                          | -13 to 135 | 7.2                              | 3.1-10.1  | 2.1                             | 0.8-3.3 |
| <u>S. anceps</u> f. <u>gracilis</u> Rabh.                   | 18                                       | .652                           | ACF             | 6.2               | 4.7-7.8 | 44                          | -16 to 366 | 8.2                              | 3.4-2.6   | 2.5                             | 0.3-8.4 |
| <u>S. anceps</u> f. <u>linearis</u> (Ehr.)<br>Hust.         | 1                                        | .006                           | IND             | 6.5               | 6.5-6.5 | 42                          | 42 to 42   | 6.6                              | 6.6-6.6   | 0.8                             | 0.8-0.8 |
| <u>S. dilatata</u> Ehr.                                     | 1                                        | .006                           |                 | 5.1               | 5.1-5.1 | -5                          | -5 to -5   | 5.2                              | 5.2-5.2   | 0.9                             | 0.9-0.9 |
| <u>S. gracillima</u> Hust.                                  | 6                                        | .379                           | ACB             | 4.8               | 4.6-5.2 | -14                         | -31 to 0   | 3.6                              | 3.1-5.8   | 1.5                             | 0.4-3.2 |
| <u>S. livingstonii</u> Reim.                                | 1                                        | .006                           |                 | 7.3               | 7.3-7.3 | 158                         | 158 to 158 | 10.0                             | 10.0-10.0 | 2.2                             | 2.2-2.2 |
| <u>S. nobilis</u> var. <u>baconiana</u><br>(Stodd.) Reim.   | 1                                        | .043                           |                 | 7.2               | 7.2-7.2 | 126                         | 126 to 126 | 8.9                              | 8.9-8.9   | 2.9                             | 2.9-2.9 |
| <u>S. phoenicenteron</u> (Nitz.) Ehr.                       | 2                                        | .025                           | IND             | 6.7               | 6.6-6.9 | 51                          | 40 to 84   | 6.8                              | 5.8-9.7   | 3.2                             | 2.9-3.9 |
| <u>S. phoenicenteron</u> f. <u>gracilis</u><br>(Ehr.) Hust. | 5                                        | .037                           | IND             | 5.6               | 4.5-7.5 | 38                          | -26 to 253 | 7.7                              | 5.2-13.4  | 1.9                             | 0.9-3.2 |
| <u>S. staurolineata</u> Reim.                               | 1                                        | .006                           |                 | 7.0               | 7.0-7.0 | 69                          | 69 to 69   | 6.3                              | 6.3-6.3   | 1.5                             | 1.5-1.5 |
| <u>S. stodderi</u> Lewis                                    | 2                                        | .012                           |                 | 6.3               | 5.7-6.8 | 41                          | 20 to 62   | 5.9                              | 4.6-7.2   | 1.3                             | 0.9-1.8 |
| <u>S. spp.</u>                                              | 3                                        | .019                           |                 | 5.7               | 5.2-6.6 | 15                          | 0 to 40    | 5.8                              | 5.8-5.8   | 3.0                             | 2.9-3.2 |

| Taxon                                                         | No. of<br>lakes<br>in which<br>taxon<br>was ob-<br>served | % of<br>grand<br>total<br>of<br>all<br>counts | pH<br>pref.<br>categ. | pH<br>Geometric<br>mean |         | Alkalinity<br>µeq/L |            | Total<br>phosphorus<br>µg/L |           | Chlorophyll <u>a</u><br>µg/L |         |
|---------------------------------------------------------------|-----------------------------------------------------------|-----------------------------------------------|-----------------------|-------------------------|---------|---------------------|------------|-----------------------------|-----------|------------------------------|---------|
|                                                               |                                                           |                                               |                       | Ave.                    | Range   | Ave.                | Range      | Ave.                        | Range     | Ave.                         | Range   |
| <u>Stenopterobia intermedia</u><br>(Lewis) Fricke             | 18                                                        | .466                                          | ACF                   | 5.4                     | 4.8-7.3 | 13                  | -13 to 158 | 4.6                         | 2.4-13.9  | 1.6                          | 0.3-6.0 |
| <u>Stephanodiscus cf. niagarae</u><br>Ehr.                    | 1                                                         | .006                                          |                       | 7.3                     | 7.3-7.3 | 250                 | 250 to 250 | --                          | --        | --                           | --      |
| <u>Surirella cf. angustata</u> Kütz.                          | 1                                                         | .006                                          | ALKF                  | 7.2                     | 7.2-7.2 | 126                 | 126 to 126 | 8.9                         | 8.9-8.9   | 2.9                          | 2.9-2.9 |
| <u>S. cf. biseriata</u> Bréb.                                 | 1                                                         | .006                                          | IND                   | 6.0                     | 6.0-6.0 | 23                  | 23 to 23   | 13.9                        | 13.9-13.9 | 6.0                          | 6.0-6.0 |
| <u>S. cf. biseriata</u> var.<br><u>constricta</u> Grun.       | 1                                                         | .012                                          |                       | 5.2                     | 5.2-5.2 | 0                   | 0 to 0     | 5.8                         | 5.8-5.8   | 3.2                          | 3.2-3.2 |
| <u>S. delicatissima</u> Lewis                                 | 23                                                        | 1.627                                         | ACF                   | 5.2                     | 4.5-7.7 | 2                   | -31 to 392 | 4.2                         | 2.7-13.9  | 1.5                          | 0.3-6.0 |
| <u>S. linearis</u> W. Sm.                                     | 5                                                         | .112                                          | IND                   | 5.2                     | 4.6-7.2 | 6                   | -31 to 118 | 4.5                         | 3.5-5.2   | 1.1                          | 0.4-1.5 |
| <u>S. linearis</u> var. <u>constricta</u><br>(Ehr.) Grun.     | 1                                                         | .012                                          | IND                   | 6.6                     | 6.6-6.6 | 40                  | 40 to 40   | 5.8                         | 5.8-5.8   | 2.9                          | 2.9-2.9 |
| <u>S. spp.</u>                                                | 4                                                         | .056                                          |                       | 5.7                     | 5.0-6.8 | 15                  | -4 to 62   | 4.4                         | 2.7-7.2   | 1.6                          | 0.3-3.2 |
| <u>Synedra amphicephala</u> Kütz.                             | 2                                                         | .012                                          |                       | 7.7                     | 7.5-7.8 | 310                 | 253 to 366 | 13.3                        | 13.2-13.4 | 4.2                          | 1.8-6.6 |
| <u>S. cf. delicatissima</u> var.<br><u>angustissima</u> Grun. | 3                                                         | .099                                          | IND                   | 7.4                     | 7.2-7.5 | 196                 | 126 to 253 | 11.3                        | 8.9-13.4  | 2.1                          | 1.8-2.9 |

| Taxon                                                                            | No. of lakes in which taxon was observed | % of grand total of all counts | pH pref. categ. | pH Geometric mean |         | Alkalinity $\mu\text{eq/L}$ |            | Total phosphorus $\mu\text{g/L}$ |           | Chlorophyll <u>a</u> $\mu\text{g/L}$ |         |
|----------------------------------------------------------------------------------|------------------------------------------|--------------------------------|-----------------|-------------------|---------|-----------------------------|------------|----------------------------------|-----------|--------------------------------------|---------|
|                                                                                  |                                          |                                |                 | Ave.              | Range   | Ave.                        | Range      | Ave.                             | Range     | Ave.                                 | Range   |
| <u>S. cf. filiformis</u> var.<br><u>exilis</u> Cl.-Eul.                          | 5                                        | .217                           |                 | 7.3               | 7.0-7.8 | 169                         | 59 to 408  | 8.1                              | 4.2-14.8  | 2.4                                  | 0.8-6.8 |
| <u>S. cf. minuscula</u> Grun.                                                    | 5                                        | .255                           | ALKF            | 7.5               | 6.0-7.8 | 250                         | 23 to 366  | 13.8                             | 6.3-18.1  | 3.4                                  | 1.5-7.7 |
| <u>S. cf. nana</u> Meist.                                                        | 7                                        | .379                           | IND             | 7.2               | 6.8-7.8 | 148                         | 62 to 408  | 11.2                             | 6.3-14.8  | 4.8                                  | 1.5-6.8 |
| <u>S. parasitica</u> (W. Sm.) Hust.                                              | 1                                        | .006                           | ALKF            | 7.0               | 7.0-7.0 | 77                          | 77 to 77   | 7.0                              | 7.0-7.0   | 2.2                                  | 2.2-2.2 |
| <u>S. rumpens</u> Kütz.                                                          | 10                                       | .441                           | IND             | 7.1               | 6.5-7.5 | 117                         | 33 to 253  | 12.3                             | 4.2-18.1  | 4.6                                  | 0.8-7.7 |
| <u>S. tabulata</u> (Ag.) Kütz.                                                   | 1                                        | .019                           |                 | 7.3               | 7.3-7.3 | 250                         | 250 to 250 | --                               | --        | --                                   | --      |
| <u>S. tenera</u> W. Sm.                                                          | 2                                        | .087                           | ACF             | 7.2               | 7.2-7.3 | 144                         | 126 to 250 | 8.9                              | 8.9-8.9   | 2.9                                  | 2.9-2.9 |
| <u>S. ulna</u> var. <u>chaseana</u> Thomas                                       | 3                                        | .043                           |                 | 7.6               | 7.3-7.8 | 317                         | 250 to 366 | 13.3                             | 13.2-13.4 | 5.6                                  | 1.8-6.6 |
| <u>S. ulna</u> var. <u>danica</u> (Kütz.)<br>V.H.                                | 2                                        | .012                           | IND             | 7.8               | 7.7-7.8 | 400                         | 392 to 408 | 9.5                              | 7.3-11.6  | 2.7                                  | 2.1-3.2 |
| <u>S. ulna</u> var. <u>oxyrhynchus</u> f.<br><u>mediocontracta</u> (Forti) Hust. | 1                                        | .012                           | ALKF            | 7.5               | 7.5-7.5 | 253                         | 253 to 253 | 13.4                             | 13.4-13.4 | 1.8                                  | 1.8-1.8 |
| <u>S. spp.</u>                                                                   | 19                                       | .758                           |                 | 7.2               | 4.5-7.8 | 222                         | -26 to 408 | 10.3                             | 2.4-13.9  | 4.3                                  | 0.6-6.6 |
| <u>Tabellaria binalis</u> (Ehr.?)<br>Grun.                                       | 6                                        | .075                           | ACB             | 5.0               | 4.6-5.2 | -7                          | -31 to 0   | 4.4                              | 3.1-5.8   | 1.4                                  | 0.4-3.2 |

| Taxon                                                                                         | No. of<br>lakes<br>in which<br>taxon<br>was ob-<br>served | % of<br>grand<br>total<br>of<br>all<br>counts | pH<br>pref.<br>categ. | pH<br>Geometric<br>mean |         | Alkalinity<br>µeq/L |            | Total<br>phosphorus<br>µg/L |          | Chlorophyll <u>a</u><br>µg/L |         |
|-----------------------------------------------------------------------------------------------|-----------------------------------------------------------|-----------------------------------------------|-----------------------|-------------------------|---------|---------------------|------------|-----------------------------|----------|------------------------------|---------|
|                                                                                               |                                                           |                                               |                       | Ave.                    | Range   | Ave.                | Range      | Ave.                        | Range    | Ave.                         | Range   |
| <u>T. flocculosa</u> (Roth) Kütz.<br>var. <u>flocculosa</u> strain<br>III <u>sensu</u> Koppen | 30                                                        | 2.398                                         | ACF                   | 6.4                     | 4.7-7.8 | 94                  | -18 to 408 | 7.6                         | 2.4-18.1 | 2.9                          | 0.6-7.7 |
| <u>T. flocculosa</u> (Roth) Kütz.<br>var. <u>flocculosa</u> strain<br>IV <u>sensu</u> Koppen  | 17                                                        | .783                                          | ACF                   | 6.3                     | 4.5-7.3 | 63                  | -31 to 158 | 10.5                        | 2.4-14.8 | 4.3                          | 0.3-6.8 |
| <u>T. flocculosa</u> (Roth) Kütz.<br>var. <u>linearis</u> Koppen                              | 22                                                        | .540                                          | ACF                   | 5.7                     | 4.5-7.3 | 24                  | -31 to 250 | 5.6                         | 2.4-18.1 | 1.5                          | 0.4-7.7 |

Footnotes for Table 10

1. Preference categories are based on literature references; procedures used to assign taxa to categories are described in text. ACB = acidobiontic; ACF = acidophilic; IND = indifferent; ALKF = alkaliphilic.

2. The weighted mean of each characteristic was determined using the following formula,

$$\bar{X} = \frac{\sum_{i=1}^{38} P_i (X_i)}{\sum_{i=1}^{38} P_i} \text{ where}$$

$\bar{X}$  = mean of the characteristic X (e.g., alkalinity).

$P_i$  = percentage occurrence of the taxon in lake sediment sample i.

$X_i$  = value of the lake water characteristic in lake i.

Initially, two tables were prepared, one with weighted and one with unweighted means. Comparison of the two indicated that the weighted values were more representative of the conditions under which optimal development of populations seemed to occur.

3. Bog lakes were excluded from calculation of means and ranges, because concentrations of total P and chlorophyll a were much higher than in the other lakes.
