# Supplementary material
Source: publisher figshare collection journal article supplement (https://wiley.figshare.com/articles/dataset/_/3521588)
Supplement: Supplementary file 6 [file 1]

Table 8. Cation and anion concentrations in Adirondack study lakes.

| LAKE NAME    | SAMPLE<br>DATE | SAMPLE<br>TYPE | Ca++<br>ueq/L | Mg++<br>ueq/L | Na+<br>ueq/L | K+<br>ueq/L | NH4+<br>ueq/L | H+<br>ueq/L | SO4--<br>ueq/L | HCO3-<br>ueq/L | Cl-<br>ueq/L | NO3-<br>ueq/L |
|--------------|----------------|----------------|---------------|---------------|--------------|-------------|---------------|-------------|----------------|----------------|--------------|---------------|
| ARBUTUS L.   | 053078         | Int            | 145           | 42            | 24           | 12          |               | 0           | 128            | 52             | 11           | 19            |
|              | 062978         | Int            | 146           | 43            | 27           | 13          |               | 0           | 118            | 90             | 6            | 11            |
|              | 081378         | Surf           | 139           | 44            | 26           | 12          |               | 0           | 115            | 76             | 6            | 0             |
|              | 081378         | Bot            | 162           | 47            | 27           | 15          |               | 0           | 86             | 91             | 6            | 29            |
|              | 082579         | Surf           | 145           | 43            | 26           | 11          | 0             | 0           | 120            | 74             | 13           | 0             |
|              | 082579         | LA             | 149           | 43            | 26           | 11          | 0             | 0           | 120            | 79             | 16           | 0             |
|              | 082579         | Int            | 148           | 43            | 28           | 11          | 0             | 0           | 120            | 94             | 16           | 0             |
|              |                |                |               |               |              |             |               |             |                |                |              |               |
| AVALANCHE L. | 062378         | Int            | 73            | 16            | 13           | 2           |               | 12          | 95             | 0              | 7            | 36            |
|              | 081778         | Surf           | 85            | 21            | 16           | 2           |               | 13          | 125            | 0              | 33           | 31            |
|              | 081778         | Bot            | 207           | 108           | 54           | 12          |               | 11          | 118            | 0              | 8            | 17            |
|              | 080979         | Surf           | 89            | 22            | 17           | 4           | 0             | 13          | 125            | 0              | 11           | 21            |
|              | 080979         | LA             | 89            | 22            | 17           | 4           | 0             | 15          | 128            | 0              | 13           | 21            |
|              | 080979         | Int            | 89            | 22            | 17           | 4           | 0             | 13          | 130            | 0              | 11           | 21            |
|              |                |                |               |               |              |             |               |             |                |                |              |               |
| BEAR P.      | 052378         | Int            | 86            | 27            | 18           | 9           |               | 9           | 143            | 0              | 15           | 11            |
|              | 071278         | Int            | 93            | 28            | 19           | 9           |               | ND          | 173            | 0              | 11           | 7             |
|              | 081078         | Surf           | 92            | 27            | 21           | 10          |               | 9           | 139            | 10             | 3            | 5             |
|              | 081078         | Bot            | 104           | 31            | 23           | 12          |               | 8           | 155            | 0              | 17           | 8             |
|              | 082379         | Surf           | 90            | 29            | 18           | 9           | 0             | 13          | 145            | 0              | 9            | 2             |
|              | 082379         | LA             | 90            | 28            | 19           | 0           | 0             | 10          | 145            | 0              | 13           | 2             |
|              | 082379         | Int            | 91            | 29            | 18           | 0           | 0             | 11          | 145            | 0              | 7            | 0             |
|              |                |                |               |               |              |             |               |             |                |                |              |               |

Table 8 (continued). Cation and anion concentrations in Adirondack study lakes.

| LAKE NAME  | SAMPLE<br>DATE | SAMPLE<br>TYPE | Ca++<br>ueq/L | Mg++<br>ueq/L | Na+<br>ueq/L | K+<br>ueq/L | NH4+<br>ueq/L | H+<br>ueq/L | SO4--<br>ueq/L | HCO3-<br>ueq/L | Cl-<br>ueq/L | NO3-<br>ueq/L |
|------------|----------------|----------------|---------------|---------------|--------------|-------------|---------------|-------------|----------------|----------------|--------------|---------------|
| BOG P.     | 052378         | Int            | 50            | 23            | 5            | 13          |               | 4           | 50             | 0              | 19           | 0             |
|            | 071278         | Int            | 37            | 21            | 6            | 12          |               | ND          | 57             | 0              | 16           | 0             |
|            | 081078         | Surf           | 43            | 24            | 9            | 5           |               | 4           | 61             | 0              | 14           | 0             |
|            | 081078         | Bot            | 129           | 44            | 16           | 30          |               | 0           | 40             | 36             | 28           | 0             |
|            | 082379         | Surf           | 40            | 20            | 8            | 2           | 0             | 3           | 50             | 7              | 9            | 1             |
|            | 082379         | LA             | 58            | 21            | 8            | 4           | 0             | 3           | 54             | 41             | 11           | 0             |
|            | 082379         | Int            | 66            | 21            | 8            | 5           | 0             | 2           | 58             | 34             | 11           | 0             |
|            |                |                |               |               |              |             |               |             |                |                |              |               |
| CAT MT. P. | 070978         | Int            | 86            | 18            | 14           | 2           |               | ND          | 137            | 0              | 31           | 3             |
|            | 081978         | Surf           | 86            | 20            | 16           | 2           |               | 10          | 133            | 0              | 9            | 0             |
|            | 081978         | Bot            | 114           | 28            | 26           | 9           |               | 3           | 127            | 5              | 19           | 0             |
|            | 081779         | Surf           | 82            | 21            | 16           | 6           | 0             | 8           | 145            | 0              | 3            | 0             |
|            | 081779         | LA             | 82            | 21            | 17           | 4           | 0             | 9           | 123            | 0              | 4            | 0             |
|            | 081779         | Int            | 82            | 21            | 16           | 5           | 0             | 9           | 130            | 0              | 3            | 0             |
|            |                |                |               |               |              |             |               |             |                |                |              |               |
| CLEAR P.   | 051278         | Int            | 191           | 96            | 26           | 4           |               | 0           | 165            | 124            | 20           | 0             |
|            | 062078         | Int            | 182           | 90            | 23           | 3           |               | 0           | 146            | 140            | 13           | 0             |
|            | 080978         | Surf           | 180           | 91            | 29           | 4           |               | 0           | 156            | 126            | 12           | 0             |
|            | 080978         | Bot            | 229           | 111           | 31           | 6           |               | 0           | 152            | 138            | 60           | 0             |
|            | 080779         | Surf           | 173           | 87            | 25           | 7           | 0             | 0           | 150            | 114            | 9            | 0             |
|            | 080779         | LA             | 177           | 90            | 25           | 7           | 0             | 0           | 150            | 113            | 7            | 0             |
|            | 080779         | Int            | 182           | 93            | 25           | 7           | 0             | 0           | 145            | 138            | 7            | 0             |
|            |                |                |               |               |              |             |               |             |                |                |              |               |

Table 8 (continued). Cation and anion concentrations in Adirondack study lakes.

| LAKE NAME             | SAMPLE DATE | SAMPLE TYPE | Ca++<br>ueq/L | Mg++<br>ueq/L | Na+<br>ueq/L | K+<br>ueq/L | NH4+<br>ueq/L | H+<br>ueq/L | SO4--<br>ueq/L | HCO3-<br>ueq/L | Cl-<br>ueq/L | NO3-<br>ueq/L |
|-----------------------|-------------|-------------|---------------|---------------|--------------|-------------|---------------|-------------|----------------|----------------|--------------|---------------|
| COPPERAS P.<br>(F.C.) | 051578      | Int         | 281           | 171           | 70           | 15          |               | ND          | 87             | 0              | 12           | 3             |
|                       | 060878      | Int         | 259           | 161           | 69           | 13          |               | 0           | 80             | 386            | 12           | 6             |
|                       | 080578      | Surf        | 296           | 194           | 77           | 15          |               | 0           | 94             | 393            | 12           | 0             |
|                       | 080578      | Bot         | 379           | 228           | 76           | 18          |               | 0           | 40             | 418            | 17           | 7             |
|                       | 082779      | Surf        | 257           | 130           | 64           | 11          | 0             | 0           | 100            | 357            | 5            | 0             |
|                       | 082779      | LA          | 261           | 133           | 64           | 11          | 0             | 0           | 80             | 382            | 7            | 0             |
|                       | 082779      | Int         | 264           | 136           | 65           | 12          | 0             | 0           | 80             | 390            | 7            | 0             |
| COPPERAS P.<br>(W.N.) | 051178      | Int         | 213           | 125           | 39           | 12          |               | 0           | 152            | 164            | 20           | 8             |
|                       | 061478      | Int         | 192           | 112           | 28           | 8           |               | 0           | 138            | 146            | 18           | 0             |
|                       | 080878      | Surf        | 183           | 114           | 28           | 8           |               | 0           | 137            | 184            | 12           | 0             |
|                       | 080878      | Bot         | 212           | ND            | 30           | 10          |               | 0           | 73             | 170            | 21           | 15            |
|                       | 080579      | Surf        | 176           | 87            | 25           | 8           | 0             | 0           | 145            | 142            | 9            | 0             |
|                       | 080579      | LA          | 188           | 91            | 26           | 8           | 0             | 0           | 130            | 174            | 9            | 0             |
|                       | 080579      | Int         | 188           | 92            | 26           | 8           | 0             | 0           | 130            | 175            | 9            | 0             |
| COWHORN P.            | 052578      | Int         | 89            | 35            | 24           | 7           |               | 1           | 102            | 24             | 16           | 9             |
|                       | 070978      | Int         | 89            | 38            | 33           | 12          |               | ND          | 126            | 0              | 26           | 3             |
|                       | 081978      | Surf        | 84            | 38            | 35           | 12          |               | 0           | 112            | 26             | 12           | 0             |
|                       | 081978      | Bot         | 128           | 47            | 37           | 14          |               | 0           | 62             | 36             | 23           | 0             |
|                       | 081779      | Surf        | 93            | 37            | 35           | 12          | 0             | 1           | 130            | 37             | 5            | 0             |
|                       | 081779      | LA          | 100           | 39            | 35           | 12          | 0             | 0           | 130            | 42             | 14           | 0             |
|                       | 081779      | Int         | 107           | 47            | 36           | 13          | 12            | 0           | 110            | 94             | 11           | 0             |

Table 8 (continued). Cation and anion concentrations in Adirondack study lakes.

| LAKE NAME    | SAMPLE<br>DATE | SAMPLE<br>TYPE | Ca++<br>ueq/L | Mg++<br>ueq/L | Na+<br>ueq/L | K+<br>ueq/L | NH4+<br>ueq/L | H+<br>ueq/L | SO4--<br>ueq/L | HCO3-<br>ueq/L | Cl-<br>ueq/L | NO3-<br>ueq/L |
|--------------|----------------|----------------|---------------|---------------|--------------|-------------|---------------|-------------|----------------|----------------|--------------|---------------|
| CRANE MT. P. | 051878         | Int            | 158           | 27            | 26           | 5           |               | 0           | 141            | 56             | 17           | 3             |
|              | 061678         | Int            | 154           | 29            | 9            | 2           |               | 0           | 137            | 48             | 10           | 1             |
|              | 080178         | Surf           | 153           | ND            | 11           | ND          |               | 0           | 148            | 7              | 9            | 0             |
|              | 080178         | Bot            | 154           | 29            | 11           | 2           |               | 0           | 150            | 79             | 24           | 0             |
|              | 081679         | Surf           | 143           | 27            | 15           | 5           | 0             | 0           | 150            | 38             | 5            | 0             |
|              | 081679         | LA             | 154           | 30            | 15           | 9           | 0             | 0           | 145            | 39             | 10           | 0             |
|              | 081679         | Int            | 144           | 28            | 14           | 9           | 0             | 0           | 145            | 44             | 11           | 0             |
| DEEP L.      | 052778         | Int            | 63            | 25            | 10           | 6           |               | 19          | 144            | 0              | 8            | 33            |
|              | 062878         | Int            | 55            | 23            | 9            | 6           |               | 20          | 139            | 0              | 6            | 36            |
|              | 080778         | Surf           | ND            | ND            | ND           | ND          |               | 22          | 141            | 0              | 6            | 31            |
|              | 080778         | Bot            | ND            | ND            | ND           | ND          |               | 17          | 139            | 0              | 7            | 27            |
|              | 090179         | Surf           | 66            | 26            | 13           | 7           | 12            | 21          | 145            | 0              | 5            | 12            |
|              | 090179         | LA             | 64            | 26            | 13           | 6           | 12            | 21          | 150            | 0              | 7            | 12            |
|              | 090179         | Int            | 68            | 26            | 14           | 7           | 12            | 21          | 145            | 0              | 7            | 24            |
| DEER L.      | 053078         | Int            | ND            | ND            | ND           | ND          |               | 0           | 136            | 0              | 8            | 10            |
|              | 060678         | Int            | ND            | ND            | ND           | ND          |               | 0           | 146            | 0              | 11           | 0             |
|              | 081378         | Surf           | ND            | ND            | ND           | ND          |               | 0           | 137            | 0              | 9            | 0             |
|              | 081378         | Bot            | ND            | ND            | ND           | ND          |               | 0           | 135            | 257            | 9            | 0             |
|              | 082579         | Surf           | 175           | 47            | 41           | 7           | 0             | 0           | 130            | 116            | 9            | 0             |
|              | 082579         | LA             | 176           | 47            | 41           | 7           | 0             | 0           | 130            | 113            | 9            | 0             |
|              | 082579         | Int            | 176           | 47            | 41           | 7           | 0             | 0           | 130            | 115            | 14           | 0             |

Table 8 (continued). Cation and anion concentrations in Adirondack study lakes.

| LAKE NAME           | SAMPLE<br>DATE | SAMPLE<br>TYPE | Ca++<br>ueq/L | Mg++<br>ueq/L | Na+<br>ueq/L | K+<br>ueq/L | NH4+<br>ueq/L | H+<br>ueq/L | SO4--<br>ueq/L | HCO3-<br>ueq/L | Cl-<br>ueq/L | NO3-<br>ueq/L |
|---------------------|----------------|----------------|---------------|---------------|--------------|-------------|---------------|-------------|----------------|----------------|--------------|---------------|
| DUNK P.             | 051778         | Int            | ND            | ND            | ND           | ND          |               | 0           | 155            | 0              | 15           | 3             |
|                     | 062278         | Int            | 304           | 96            | 37           | 6           |               | 0           | 170            | 238            | 17           | 0             |
|                     | 081178         | Surf           | ND            | ND            | ND           | ND          |               | 0           | 179            | 0              | 15           | 4             |
|                     | 081178         | Bot            | ND            | ND            | ND           | ND          |               | 0           | 110            | 403            | 14           | 13            |
|                     | 082879         | Surf           | 341           | 81            | 31           | 8           | 0             | 0           | 145            | 273            | 9            | 0             |
|                     | 082879         | LA             | 356           | 81            | 31           | 8           | 0             | 0           | 145            | 323            | 7            | 0             |
|                     | 082879         | Int            | 418           | 87            | 33           | 11          | 0             | 0           | 130            | 373            | 11           | 0             |
| EAST COPPERAS<br>P. | 051578         | Int            | 65            | 13            | 8            | 11          |               | 11          | 92             | 0              | 16           | 2             |
|                     | 060878         | Int            | 59            | 11            | 5            | 9           |               | 8           | 90             | 2              | 22           | 0             |
|                     | 080578         | Surf           | 35            | 12            | 6            | 16          |               | 32          | 128            | 0              | 31           | 0             |
|                     | 080578         | Bot            | 79            | 15            | 7            | 12          |               | 24          | 105            | 0              | 21           | 0             |
|                     | 082779         | Surf           | 46            | 15            | 5            | 9           | 0             | 33          | 80             | 0              | 0            | 0             |
|                     | 082779         | LA             | 51            | 15            | 5            | 9           | 0             | 23          | 80             | 0              | 14           | 0             |
|                     | 082779         | Int            | 41            | 14            | 5            | 10          | 0             | 37          | 80             | 0              | 9            | 0             |
| FRANK P.            | 062278         | Int            | 117           | 43            | 25           | 3           |               | 0           | 146            | 50             | 10           | 0             |
|                     | 081178         | Surf           | 120           | 42            | 25           | 3           |               | 0           | 118            | 38             | 8            | 0             |
|                     | 081178         | Bot            | 122           | 37            | 22           | 3           |               | 0           | 106            | 47             | 9            | 0             |
|                     | 082879         | Surf           | 117           | 37            | 23           | 6           | 0             | 0           | 110            | 37             | 5            | 0             |
|                     | 082879         | LA             | 121           | 37            | 23           | 6           | 0             | 0           | 118            | 42             | 8            | 0             |
|                     | 082879         | Int            | 126           | 38            | 24           | 6           | 0             | 0           | 120            | 47             | 3            | 0             |

Table 8 (continued). Cation and anion concentrations in Adirondack study lakes.

| LAKE NAME          | SAMPLE<br>DATE | SAMPLE<br>TYPE | Ca++<br>ueq/L | Mg++<br>ueq/L | Na+<br>ueq/L | K+<br>ueq/L | NH4+<br>ueq/L | H+<br>ueq/L | SO4--<br>ueq/L | HCO3-<br>ueq/L | Cl-<br>ueq/L | NO3-<br>ueq/L |
|--------------------|----------------|----------------|---------------|---------------|--------------|-------------|---------------|-------------|----------------|----------------|--------------|---------------|
| GIANTS<br>WASHBOWL | 051078         | Int            | 230           | 54            | 24           | 0           |               | 0           | 146            | 143            | 12           | 7             |
|                    | 060678         | Int            | 250           | 59            | 31           | 2           |               | 0           | 162            | 154            | 22           | 3             |
|                    | 080878         | Surf           | 232           | 56            | 28           | 0           |               | 0           | 161            | 147            | 8            | 0             |
|                    | 080878         | Bot            | 347           | 84            | 39           | 0           |               | 0           | 165            | 210            | 14           | 0             |
|                    | 080479         | Surf           | 236           | 44            | 24           | 2           | 0             | 0           | 135            | 159            | 3            | 0             |
|                    | 080479         | LA             | 164           | 53            | 31           | 3           | 0             | 0           | 132            | 113            | 6            | 0             |
|                    | 080479         | Int            | 280           | 54            | 29           | 3           | 0             | 0           | 130            | 210            | 7            | 0             |
| GREEN P.           | 052378         | Int            | 91            | 36            | 20           | 9           |               | ND          | 124            | 26             | 11           | 0             |
|                    | 071278         | Int            | 93            | 41            | 22           | 10          |               | ND          | 124            | 0              | 9            | 0             |
|                    | 081078         | Surf           | 94            | 39            | 22           | 10          |               | 1           | 137            | 7              | 10           | 0             |
|                    | 081078         | Bot            | 102           | 39            | 21           | 10          |               | 1           | 102            | 7              | 8            | 0             |
|                    | 082379         | Surf           | 83            | 35            | 20           | 10          | 0             | 1           | 110            | 16             | 5            | 0             |
|                    | 082379         | LA             | 84            | 35            | 20           | 10          | 0             | 0           | 110            | 23             | 5            | 0             |
|                    | 082379         | Int            | 84            | 35            | 20           | 10          | 0             | 0           | 120            | 17             | 7            | 0             |
| GULL P.            | 051278         | Int            | 232           | 63            | 31           | 7           |               | 0           | 113            | 200            | 12           | 0             |
|                    | 062078         | Int            | 206           | 61            | 29           | 6           |               | 0           | 118            | 124            | 12           | 0             |
|                    | 080978         | Surf           | 209           | 62            | 30           | 6           |               | 0           | 132            | 131            | 11           | 0             |
|                    | 080978         | Bot            | 277           | ND            | 31           | 9           |               | 0           | 39             | 257            | 39           | 0             |
|                    | 080779         | Surf           | 211           | 53            | 28           | 7           | 0             | 0           | 120            | 152            | 11           | 0             |
|                    | 080779         | LA             | 243           | 57            | 31           | 8           | 15            | 0           | 110            | 204            | 13           | 0             |
|                    | 080779         | Int            | 258           | 59            | 30           | 8           | 24            | 0           | 110            | 256            | 13           | 0             |

Table 8 continued). Cation and anion concentrations in Adirondack study lakes.

| LAKE NAME  | SAMPLE<br>DATE | SAMPLE<br>TYPE | Ca++<br>ueq/L | Mg++<br>ueq/L | Na+<br>ueq/L | K+<br>ueq/L | NH4+<br>ueq/L | H+<br>ueq/L | SO4--<br>ueq/L | HCO3-<br>ueq/L | Cl-<br>ueq/L | NO3-<br>ueq/L |
|------------|----------------|----------------|---------------|---------------|--------------|-------------|---------------|-------------|----------------|----------------|--------------|---------------|
| HEART L.   | 051478         | Int            | ND            | ND            | ND           | ND          |               | 0           | ND             | 0              | ND           | 4             |
|            | 060478         | Int            | 128           | 26            | 20           | 2           |               | 0           | 130            | 50             | 15           | 2             |
|            | 081678         | Surf           | 120           | 27            | 22           | 3           |               | 0           | 118            | 43             | 12           | 0             |
|            | 081678         | Bot            | 132           | 26            | 19           | 5           |               | 0           | 44             | 96             | 16           | 17            |
|            | 081179         | Surf           | 120           | 23            | 21           | 2           | 0             | 0           | 110            | 33             | 9            | 0             |
|            | 081179         | LA             | 123           | 23            | 21           | 3           | 0             | 0           | 110            | 39             | 10           | 0             |
|            | 081179         | Int            | 129           | 23            | 21           | 3           | 15            | 0           | 100            | 78             | 13           | 0             |
|            |                |                |               |               |              |             |               |             |                |                |              |               |
| HUNTLEY P. | 051778         | Int            | 424           | 94            | 30           | 9           |               | 0           | 135            | 393            | 15           | 15            |
|            | 081278         | Surf           | 437           | 102           | 35           | 9           |               | 0           | 119            | 450            | 13           | 0             |
|            | 081278         | Bot            | 567           | 129           | 38           | 12          |               | 0           | 47             | 542            | 17           | 0             |
|            | 082879         | Surf           | 448           | 83            | 33           | 10          | 0             | 0           | 120            | 436            | 18           | 0             |
|            | 082879         | LA             | 480           | 85            | 33           | 10          | 4             | 0           | 120            | 474            | 18           | 0             |
|            | 082879         | Int            | 476           | 87            | 34           | 11          | 15            | 0           | 120            | 490            | 13           | 0             |
|            |                |                |               |               |              |             |               |             |                |                |              |               |
| JENKINS P. | 060178         | Int            | 152           | 48            | 29           | 8           |               | ND          | 135            | 0              | 15           | 38            |
|            | 073178         | Int            | 142           | 48            | 27           | 8           |               | 1           | 124            | 16             | 9            | 34            |
|            | 073178         | Surf           | 141           | 43            | 27           | 8           |               | 0           | 132            | 40             | 9            | 37            |
|            | 083079         | Surf           | 140           | 42            | 26           | 9           | 0             | 0           | 130            | 11             | 7            | 32            |
|            | 083079         | LA             | 140           | 42            | 26           | 9           | 0             | 0           | 127            | 31             | 9            | 32            |
|            | 083079         | Int            | 141           | 42            | 26           | 9           | 0             | 0           | 130            | 32             | 9            | 33            |
|            |                |                |               |               |              |             |               |             |                |                |              |               |

Table 8 continued). Cation and anion concentrations in Adirondack study lakes.

| LAKE NAME                | SAMPLE<br>DATE | SAMPLE<br>TYPE | Ca++<br>ueq/L | Mg++<br>ueq/L | Na+<br>ueq/L | K+<br>ueq/L | NH4+<br>ueq/L | H+<br>ueq/L | SO4--<br>ueq/L | HCO3-<br>ueq/L | Cl-<br>ueq/L | NO3-<br>ueq/L |
|--------------------------|----------------|----------------|---------------|---------------|--------------|-------------|---------------|-------------|----------------|----------------|--------------|---------------|
| L. ARNOLD                | 080279         | Surf           | 84            | 18            | 15           | 2           | 0             | 13          | 120            | 0              | 9            | 10            |
|                          | 080279         | LA             | 84            | 19            | 15           | 2           | 0             | 13          | 114            | 0              | 10           | 9             |
|                          | 080279         | Int            | 84            | 19            | 16           | 2           | 0             | 14          | 113            | 0              | 9            | 8             |
| L. COLDEN                | 062378         | Int            | 90            | 7             | 22           | 2           |               | 9           | 162            | 0              | 9            | 20            |
|                          | 081778         | Surf           | 104           | 22            | 21           | 3           |               | 13          | 132            | 0              | 4            | 14            |
|                          | 081778         | Bot            | 105           | 25            | 20           | 4           |               | 11          | 134            | 0              | 11           | 14            |
| L. TEAR OF<br>THE CLOUDS | 080279         | Surf           | 82            | 16            | 23           | 3           | 0             | 27          | 115            | 0              | 18           | 33            |
|                          | 080279         | LA             | 82            | 16            | 23           | 3           | 0             | 27          | 115            | 0              | 18           | 33            |
|                          | 080279         | Int            | 82            | 16            | 23           | 3           | 0             | 21          | 115            | 0              | 18           | 33            |
| LITTLE PINE P.           | 080478         | Surf           | 392           | 200           | 80           | 9           |               | 0           | 182            | 460            | 15           | 0             |
|                          | 080679         | Surf           | 371           | 145           | 75           | 9           | 0             | 0           | 145            | 431            | 24           | 0             |
|                          | 080679         | LA             | 378           | 145           | 75           | 9           | 0             | 0           | 148            | 436            | 23           | 0             |
|                          | 080679         | Int            | 378           | 145           | 75           | 9           | 0             | 0           | 148            | 436            | 23           | 0             |



Table 8 continued). Cation and anion concentrations in Adirondack study lakes.

| LAKE NAME            | SAMPLE<br>DATE | SAMPLE<br>TYPE | Ca++<br>ueq/L | Mg++<br>ueq/L | Na+<br>ueq/L | K+<br>ueq/L | NH4+<br>ueq/L | H+<br>ueq/L | SO4--<br>ueq/L | HCO3-<br>ueq/L | Cl-<br>ueq/L | NO3-<br>ueq/L |
|----------------------|----------------|----------------|---------------|---------------|--------------|-------------|---------------|-------------|----------------|----------------|--------------|---------------|
| LITTLE SHALLOW<br>P. | 052678         | Int            | 192           | 90            | 50           | 15          |               | 0           | 182            | 114            | 17           | 35            |
|                      | 071078         | Int            | 202           | 99            | 55           | 17          |               | ND          | 164            | 0              | 14           | 50            |
|                      | 082078         | Surf           | 209           | 107           | 60           | 17          |               | 0           | 150            | 172            | 13           | 35            |
|                      | 082078         | Bot            | 210           | 102           | 56           | 17          |               | 0           | 147            | 188            | 13           | 33            |
|                      | 082079         | Surf           | 216           | 84            | 56           | 15          | 0             | 0           | 150            | 191            | 18           | 0             |
|                      | 082079         | LA             | 214           | 84            | 56           | 15          | 0             | 0           | 157            | 155            | 16           | 41            |
|                      | 082079         | Int            | 214           | 84            | 56           | 15          | 0             | 0           | 157            | 155            | 16           | 41            |
|                      |                |                |               |               |              |             |               |             |                |                |              |               |
| LIVINGSTON P.        | 062478         | Int            | 115           | 27            | 20           | 7           |               | 1           | 131            | 10             | 7            | 25            |
|                      | 081778         | Surf           | 94            | 27            | 21           | 6           |               | 2           | 143            | 7              | 11           | 19            |
|                      | 081778         | Bot            | 128           | 36            | 25           | 8           |               | 1           | 140            | 23             | 15           | 0             |
|                      | 080979         | Surf           | 115           | 28            | 24           | 6           | 0             | 1           | 130            | 7              | 9            | 16            |
|                      | 080979         | LA             | 115           | 27            | 23           | 5           | 0             | 1           | 125            | 6              | 9            | 17            |
|                      | 080979         | Int            | 123           | 28            | 24           | 5           | 0             | 0           | 130            | 20             | 10           | 16            |
|                      |                |                |               |               |              |             |               |             |                |                |              |               |
| LONG P.              | 060178         | Int            | 140           | 22            | 21           | 8           |               | 3           | 155            | 8              | 8            | 31            |
|                      | 073178         | Surf           | 135           | 38            | 24           | 7           |               | 1           | 164            | 13             | 5            | 8             |
|                      | 073178         | Bot            | 152           | 36            | 22           | 8           |               | ND          | 153            | 0              | 10           | 6             |
|                      | 083079         | Surf           | 138           | 37            | 24           | 8           | 0             | 0           | 145            | 41             | 11           | 6             |
|                      | 083079         | LA             | 139           | 37            | 25           | 8           | 3             | 0           | 150            | 42             | 10           | 8             |
|                      | 083079         | Int            | 139           | 37            | 24           | 8           | 3             | 0           | 140            | 32             | 9            | 8             |
|                      |                |                |               |               |              |             |               |             |                |                |              |               |

Table 8 continued). Cation and anion concentrations in Adirondack study lakes.

| LAKE NAME   | SAMPLE<br>DATE | SAMPLE<br>TYPE | Ca++<br>ueq/L | Mg++<br>ueq/L | Na+<br>ueq/L | K+<br>ueq/L | NH4+<br>ueq/L | H+<br>ueq/L | SO4--<br>ueq/L | HCO3-<br>ueq/L | Cl-<br>ueq/L | NO3-<br>ueq/L |
|-------------|----------------|----------------|---------------|---------------|--------------|-------------|---------------|-------------|----------------|----------------|--------------|---------------|
| MOUNTAIN P. | 052178         | Int            | 40            | 10            | 5            | 10          |               | 10          | 57             | 0              | 7            | 0             |
|             | 061378         | Int            | 41            | 10            | 2            | 11          |               | 11          | 64             | 0              | 10           | 0             |
|             | 081878         | Surf           | 43            | 12            | 2            | 11          |               | 24          | 75             | 0              | 17           | 0             |
|             | 081878         | Bot            | 50            | 13            | 1            | 15          |               | 12          | 28             | 0              | 9            | 0             |
|             | 082279         | Surf           | 22            | 16            | 10           | 10          | 0             | 22          | 50             | 0              | 3            | 0             |
|             | 082279         | LA             | 22            | 16            | 1            | 10          | 0             | 19          | 50             | 0              | 3            | 0             |
|             | 082279         | Int            | 22            | 16            | 10           | 11          | 0             | 9           | 40             | 0              | 5            | 0             |
| NICK'S P.   | 053178         | Int            | 85            | 17            | 15           | 4           |               | 6           | 107            | 4              | 1            | 5             |
|             | 070878         | Int            | 86            | 17            | 16           | 5           |               | 4           | 108            | 7              | 5            | 3             |
|             | 081478         | Surf           | 90            | 22            | 15           | 5           |               | 8           | 118            | 0              | 4            | 0             |
|             | 081478         | Bot            | 81            | 19            | 13           | 5           |               | 8           | 119            | 22             | 4            | 0             |
|             | 082279         | Surf           | 75            | 25            | 18           | 6           | 0             | 3           | 105            | 3              | 7            | 0             |
|             | 082279         | LA             | 75            | 25            | 18           | 6           | 0             | 4           | 110            | 3              | 7            | 0             |
|             | 082279         | Int            | 75            | 25            | 18           | 6           | 0             | 3           | 105            | 3              | 7            | 0             |
| PARCH P.    | 062778         | Int            | 130           | 34            | 18           | 2           |               | 0           | 84             | 92             | 9            | 0             |
|             | 080678         | Surf           | 139           | 38            | 24           | 4           |               | 0           | 86             | 96             | 10           | 0             |
|             | 080678         | Bot            | 166           | 40            | 20           | 4           |               | 0           | 72             | 83             | 10           | 0             |
|             | 080879         | Surf           | 131           | 41            | 20           | 2           | 0             | 0           | 100            | 81             | 9            | 0             |
|             | 080879         | LA             | 137           | 41            | 20           | 2           | 0             | 0           | 80             | 110            | 10           | 0             |
|             | 080879         | Int            | 153           | 44            | 20           | 3           | 0             | 0           | 80             | 89             | 10           | 0             |

Table 8 continued). Cation and anion concentrations in Adirondack study lakes.

| LAKE NAME | SAMPLE<br>DATE | SAMPLE<br>TYPE | Ca++<br>ueq/L | Mg++<br>ueq/L | Na+<br>ueq/L | K+<br>ueq/L | NH4+<br>ueq/L | H+<br>ueq/L | SO4--<br>ueq/L | HCO3-<br>ueq/L | Cl-<br>ueq/L | NO3-<br>ueq/L |
|-----------|----------------|----------------|---------------|---------------|--------------|-------------|---------------|-------------|----------------|----------------|--------------|---------------|
| PINE P.   | 052278         | Int            | 143           | 49            | 36           | 6           |               | 0           | 136            | 85             | 11           | 4             |
|           | 061778         | Int            | 142           | 49            | 36           | 8           |               | 0           | 140            | 75             | 12           | 3             |
|           | 080478         | Surf           | 140           | 50            | 38           | 6           |               | 0           | 138            | 68             | 12           | 0             |
|           | 080478         | Bot            | 158           | 55            | 40           | 8           |               | 0           | 128            | 89             | 11           | 0             |
|           | 080679         | Surf           | 134           | 54            | 38           | 7           | 0             | 0           | 130            | 94             | 9            | 0             |
|           | 080679         | LA             | 136           | 53            | 37           | 7           | 0             | 0           | 145            | 77             | 11           | 0             |
|           | 080679         | Int            | 138           | 52            | 37           | 7           | 0             | 0           | 115            | 84             | 9            | 0             |
|           |                |                |               |               |              |             |               |             |                |                |              |               |
| ROCK P.   | 051178         | Int            | 192           | 48            | 37           | 7           |               | 0           | 162            | 99             | 13           | 10            |
|           | 061478         | Int            | 213           | 59            | 46           | 8           |               | 0           | 178            | 60             | 15           | 14            |
|           | 080378         | Surf           | 233           | 61            | 45           | 9           |               | 0           | 159            | 76             | 15           | 0             |
|           | 080378         | Bot            | 200           | 58            | 45           | 9           |               | 0           | 187            | 60             | 10           | 8             |
|           | 080579         | Surf           | 196           | 55            | 40           | 8           | 0             | 0           | 180            | 82             | 13           | 0             |
|           | 080579         | LA             | 201           | 56            | 41           | 9           | 0             | 0           | 180            | 112            | 13           | 0             |
|           | 080579         | Int            | 213           | 56            | 42           | 8           | 0             | 0           | 170            | 130            | 13           | 2             |
|           |                |                |               |               |              |             |               |             |                |                |              |               |
| ROUND P.  | 051078         | Int            | 134           | 20            | 20           | 1           |               | 0           | 99             | 64             | 4            | 0             |
|           | 060678         | Int            | 141           | 23            | 21           | 2           |               | 0           | 106            | 75             | 7            | 0             |
|           | 081678         | Surf           | 130           | 27            | 22           | 1           |               | 0           | 113            | 57             | 10           | 0             |
|           | 081678         | Bot            | 176           | 33            | 23           | 3           |               | ND          | 84             | 101            | 14           | 0             |
|           | 081379         | Surf           | 138           | 25            | 23           | 1           | 0             | 0           | 100            | 73             | 13           | 0             |
|           | 081379         | LA             | 142           | 25            | 23           | 1           | 0             | 0           | 85             | 90             | 8            | 0             |
|           | 081379         | Int            | 148           | 26            | 22           | 1           | 3             | 0           | 80             | 103            | 7            | 0             |
|           |                |                |               |               |              |             |               |             |                |                |              |               |

Table 8 continued). Cation and anion concentrations in Adirondack study lakes.

| LAKE NAME            | SAMPLE<br>DATE | SAMPLE<br>TYPE | Ca++<br>ueq/L | Mg++<br>ueq/L | Na+<br>ueq/L | K+<br>ueq/L | NH4+<br>ueq/L | H+<br>ueq/L | SO4--<br>ueq/L | HCO3-<br>ueq/L | Cl-<br>ueq/L | NO3-<br>ueq/L |
|----------------------|----------------|----------------|---------------|---------------|--------------|-------------|---------------|-------------|----------------|----------------|--------------|---------------|
| UPPER<br>WALLFACE P. | 061078         | Int            | 76            | 14            | 11           | 1           |               | 9           | 158            | 0              | 17           | 5             |
|                      | 081578         | Surf           | 62            | 15            | 12           | 1           |               | 11          | 112            | 0              | 12           | 0             |
|                      | 081578         | Bot            | 65            | 16            | 17           | 3           |               | 12          | 109            | 0              | 10           | 0             |
|                      | 081279         | Surf           | 65            | 17            | 14           | 1           | 0             | 10          | 110            | 0              | 3            | 0             |
|                      | 081279         | LA             | 65            | 17            | 13           | 10          | 0             | 10          | 110            | 0              | 4            | 0             |
|                      | 081279         | Int            | 69            | 17            | 13           | 1           | 0             | 10          | 110            | 0              | 5            | 0             |
| WASHBOWL P.          | 052678         | Int            | 46            | 9             | 5            | 11          |               | 36          | 68             | 0              | 9            | 0             |
|                      | 071078         | Int            | 42            | 10            | 6            | 13          |               | ND          | 98             | 0              | 13           | 0             |
|                      | 082078         | Surf           | 49            | 13            | 6            | 14          |               | 44          | 96             | 0              | 9            | 0             |
|                      | 082078         | Bot            | 52            | 12            | 6            | 14          |               | 44          | 119            | 0              | 10           | 31            |
|                      | 082079         | Surf           | 38            | 17            | 9            | 12          | 0             | 28          | 80             | 0              | 9            | 0             |
|                      | 082079         | LA             | 38            | 17            | 9            | 12          | 0             | 30          | 80             | 0              | 10           | 0             |
|                      | 082079         | Int            | 38            | 17            | 9            | 12          | 0             | 30          | 80             | 0              | 10           | 0             |
| WOLF L.              | 053078         | Int            | 160           | 41            | 25           | 7           |               | 0           | 136            | 56             | 9            | ND            |
|                      | 062978         | Int            | 167           | 45            | 27           | 9           |               | 0           | 134            | 68             | 10           | 32            |
|                      | 081378         | Surf           | 175           | 47            | 30           | 9           |               | 0           | 140            | 78             | 4            | 25            |
|                      | 081378         | Bot            | 176           | 47            | 29           | 9           |               | 0           | 119            | 72             | 5            | 18            |
|                      | 082579         | Surf           | 175           | 44            | 29           | 9           | 0             | 0           | 120            | 82             | 11           | 20            |
|                      | 082579         | LA             | 175           | 44            | 29           | 9           | 0             | 0           | 117            | 80             | 11           | 20            |
|                      | 082579         | Int            | 176           | 44            | 29           | 9           | 0             | 0           | 110            | 113            | 13           | 20            |

Footnotes for Table 8

ND = no data

Surf = surface; LA = lake average; Int = Integrated-water-column

See Table 5 or 6 for depth of integrated sample.

$\text{HCO}_3^-$  concentrations were not measured directly, but estimated using alkalinity values or the anion deficit. If alkalinity values were equal to or less than 0,  $\text{HCO}_3^-$  was made equal to 0. If alkalinity ranged from 0 to 50  $\mu\text{eq/L}$ ,  $\text{HCO}_3^-$  was set equal to alkalinity. At alkalinities greater than 50  $\mu\text{eq/L}$ ,  $\text{HCO}_3^-$  concentration was assumed to be equal to the anion deficit calculated from concentrations of all other measured ions. This was done because at higher alkalinities,  $\text{HCO}_3^-$  can be significantly overestimated by equating it to alkalinity. For example, in highly colored lakes, organic acids can be important contributors to alkalinity. In the higher alkalinity lakes pH is high enough so that Al and organic acids probably contribute little to the overall charge balance, even though their total concentrations may be high.
